# Supplementary material for: Synthesis of fluorinated polycyclic dehydroaltenusin analogs through hypervalent iodine-catalyzed dearomatization
Source: Royal Society of Chemistry journal article supplement (doi:10.1039/d2ob01582j), 2022-01-01

# Supporting Information

## Synthesis of Fluorinated Polycyclic Dehydroaltenusin Analogs through Hypervalent Iodine-Catalyzed Dearomatization

Jiaqi Cao,<sup>†a</sup> Qingfu Deng,<sup>†a</sup> Liangzhen Hu,<sup>\*a</sup> Xiaohui Zhang,<sup>a</sup> and Yan Xiong<sup>\*a,b,c</sup>

<sup>a</sup> School of Chemistry and Chemical Engineering, and Chongqing Key Laboratory of Theoretical and Computational Chemistry, Chongqing University, Chongqing 401331, China

<sup>b</sup> State Key Laboratory of Elemento-Organic Chemistry, Nankai University, Tianjin 300071, China

<sup>c</sup> School of Chemical and Environmental Engineering, and Collaborative Innovation Center for High Value Transformation of Coal Chemical Process By-products, Xinjiang Institute of Engineering, Xinjiang 830091, China

<sup>†</sup> These authors contributed equally to this work.

\* Email: [huliangzhen@cqu.edu.cn](mailto:huliangzhen@cqu.edu.cn); Email: [xiong@cqu.edu.cn](mailto:xiong@cqu.edu.cn).

### Table of contents

|                                                                                                              |    |
|--------------------------------------------------------------------------------------------------------------|----|
| 1. Experimental Section .....                                                                                | S2 |
| 2. <sup>1</sup> H-NMR, <sup>13</sup> C-NMR, <sup>19</sup> F-NMR and HRMS Analytical Data .....               | S4 |
| 3. Copies of <sup>1</sup> H-NMR, <sup>13</sup> C-NMR, <sup>19</sup> F-NMR and HRMS spectra of products ..... | S9 |

# 1. Experimental Section

**General Information.**  $^1\text{H}$ - and  $^{13}\text{C}$ -NMR spectra were recorded in  $\text{CDCl}_3$  solution on a Bruker Avance 500 spectrometer at 20~25 °C.  $^1\text{H}$  NMR spectra were reported in parts per million using tetramethylsilane TMS ( $\delta = 0.00$  ppm) as an internal standard. The data of  $^1\text{H}$  NMR were reported as follows: chemical shift, multiplicity (s = singlet, d = doublet, t = triplet, q = quartet, m = multiplet), coupling constants ( $J$ , Hz), and integration.  $^{13}\text{C}$  NMR spectra were reported in parts per million using solvent  $\text{CDCl}_3$  ( $\delta = 77.2$  ppm) as an internal standard. The data of  $^{13}\text{C}$  NMR were reported as follows: chemical shift, multiplicity (s = singlet, d = doublet, t = triplet, q = quartet, m = multiplet), and coupling constants ( $J$ , Hz). High resolution mass spectra (HRMS) were obtained with a Q-TOF MS spectrometer. Thin layer chromatography (TLC) was performed on a glass plate coated with GF254 silica gel and observed under 254nm UV light, while column chromatography was performed using silica gel HG/T2354-2010. All reagents were analytically pure, purchased from commercial suppliers and used directly unless further purification is indicated otherwise. All reactions were performed at atmospheric pressure and all reagent weighing was performed at room temperature in air.

## Typical Procedure for Synthesis of 1.

For starting materials: **1a, 1b, 1c, 1d, 1e, 1f, 1g, 1h, 1i, 1j and 1k.**

(i) To a solution of bromobenzoate (10 mmol), 2 N  $\text{Na}_2\text{CO}_3$  (10 mL, 2 equivalents) and (3-hydroxyphenyl) boronic acid (10 mmol, 1 equivalent) in toluene (50 mL) was added  $\text{Pd}(\text{dppf})\text{Cl}_2$  (0.5 mmol, 5 mol %) under argon. After stirring for 14 h, the solvent was removed by vacuum and the mixture was purified by silica-gel column chromatography (10 : 1 petroleum ether : EtOAc) to give colourless oil liquid biphenyl-carboxylate (90% yield). (ii) To a solution of biphenyl-carboxylate (9 mmol) in THF (25.0 mL) and MeOH (25.0 mL) was added 2 N NaOH (25.0 mL, 5.6 equivalents) and stirred overnight at room temperature. The reaction mixture was cooled to 0 °C, quenched with 1 N HCl until pH reached to 2, and extracted with EtOAc (30 mL  $\times$  3). The organic layers were dried over anhydrous  $\text{MgSO}_4$  and the solvents were removed in vacuo to give pure solid biphenyl-carboxylic acid with quantitative yield.

For starting materials: **1l, 1m, 1n, 1o and 1p.**

(i) To a solution of 3-bromophenol (10 mmol), 2 N  $\text{Na}_2\text{CO}_3$  (10 mL, 2 equivalents) and (2-(methoxycarbonyl)phenyl) boronic acid (10 mmol, 1 equivalent) in DMF (50 mL) was added  $\text{Pd}(\text{PPh}_3)_4$  (0.5 mmol, 5 mol %) under argon. After stirring for 14 h, the solvent was removed by vacuum and the mixture was purified by silica-gel column chromatography (10 : 1 petroleum ether : EtOAc) to give colourless oil liquid biphenyl-carboxylate (80% yield). (ii) To a solution of biphenyl-carboxylate (9 mmol) in THF (25.0 mL) and MeOH (25.0 mL) was added 2 N NaOH (25.0 mL, 5.6 equivalents) and stirred overnight at room temperature. The reaction mixture was cooled to 0 °C, quenched with 1 N HCl until pH reached to 2, and extracted with EtOAc (30 mL  $\times$  3). The organic layers were dried over anhydrous  $\text{MgSO}_4$  and the solvents were removed in vacuo to give pure solid biphenyl-carboxylic acid with quantitative yield.

## General Procedure for Synthesis of 2.

To a round-bottom flask was charged with **1** (0.3 mmol), 20 wt% HFIP, *m*-CPBA (1.2 mmol), PhI (0.15 mmol) and pyr-HF (1.8 mmol) in DCM (1 mL) at 35 °C for 10 h. The reaction was quenched with saturated solution of  $\text{Na}_2\text{S}_2\text{O}_3$  (1 mL). The organic phase was separated, and the aqueous layer was extracted with DCM (5 mL  $\times$  3). The combined

organic solution was dried with  $\text{Mg}_2\text{SO}_4$  and concentrated in vacuo. The resulting residue was purified by a column chromatography to give **2**.

## 2. <sup>1</sup>H-NMR, <sup>13</sup>C-NMR, <sup>19</sup>F-NMR and HRMS Analytical Data

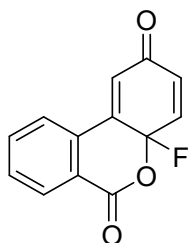

4a-fluoro-6H-benzo[c]chromene-2,6(4aH)-dione (**2a**). Purification was performed by column chromatography (petroleum ether / ethyl acetate = 10 / 1) to afford 63.5 mg (92%) of **2a**. yellowish solid. mp 140-141 °C. <sup>1</sup>H NMR (500 MHz, CDCl<sub>3</sub>) δ 8.23 (d, *J* = 8 Hz, 1H), 7.80 (t, *J* = 8 Hz, 1H), 7.75 (d, *J* = 8 Hz, 1H), 7.69 (t, *J* = 8 Hz, 1H), 6.98 (dd, *J* = 10, 3 Hz, 1H), 6.70 (s, 1H), 6.44 (d, *J* = 10 Hz, 1H). <sup>13</sup>C {H} NMR (126 MHz, CDCl<sub>3</sub>) δ 184.0 (d, *J* = 4 Hz), 160.2, 141.2 (d, *J* = 10 Hz), 138.3 (d, *J* = 10 Hz), 135.6, 132.2, 132.1, 131.2, 131.1, 124.8, 124.4 (d, *J* = 4 Hz), 122.8, 102.6 (d, *J* = 214 Hz). HRMS (ESI-TOF) *m/z* calcd for C<sub>13</sub>H<sub>7</sub>FO<sub>3</sub> (M-H)<sup>-</sup> 229.0306, found 229.0302. <sup>19</sup>F NMR(376 MHz, CDCl<sub>3</sub>): -90.6 ppm.

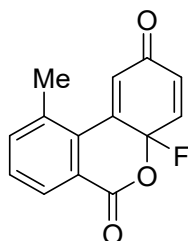

4a-fluoro-10-methyl-6H-benzo[c]chromene-2,6(4aH)-dione (**2b**). Purification was performed by column chromatography (petroleum ether / ethyl acetate = 10 / 1) to afford 69.1 mg (94%) of **2b**. yellowish solid. mp 146-147 °C. <sup>1</sup>H NMR (500 MHz, CDCl<sub>3</sub>) δ 8.10 (d, *J* = 7.5 Hz, 1H), 7.63 (d, *J* = 7.5 Hz, 1H), 7.53 (t, *J* = 7.5 Hz, 1H), 6.97 (dd, *J* = 10, 5 Hz, 1H), 6.59 (s, 1H), 6.45 (d, *J* = 10 Hz, 1H), 2.59 (s, 3H). <sup>13</sup>C {H} NMR (126 MHz, CDCl<sub>3</sub>) δ 184.1 (d, *J* = 4 Hz), 160.7, 140.6 (d, *J* = 25 Hz), 138.6 (d, *J* = 25 Hz), 138.3, 137.1, 130.9, 130.6, 130.3 (d, *J* = 8 Hz), 129.3, 128.2 (d, *J* = 5 Hz), 123.9, 102.3 (d, *J* = 215 Hz), 21.3. HRMS (ESI-TOF) *m/z* calcd for C<sub>14</sub>H<sub>9</sub>FO<sub>3</sub> (M+Na)<sup>+</sup> 267.0427, found 267.0429. <sup>19</sup>F NMR(376 MHz, CDCl<sub>3</sub>): -96.6 ppm.

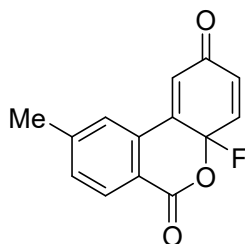

4a-fluoro-9-methyl-6H-benzo[c]chromene-2,6(4aH)-dione (**2c**). Purification was performed by column chromatography (petroleum ether / ethyl acetate = 10 / 1) to afford 66.1 mg (90%) of **2c**. yellowish solid. mp 145-147 °C. <sup>1</sup>H NMR (500 MHz, CDCl<sub>3</sub>) δ 8.12 (d, *J* = 8 Hz, 1H), 7.54 (s, 1H), 7.48 (d, *J* = 8 Hz, 1H), 6.97 (dd, *J* = 10, 4 Hz, 1H), 6.69 (s, 1H), 6.44 (d, *J* = 10 Hz, 1H), 2.52 (s, 3H). <sup>13</sup>C {H} NMR (126 MHz, CDCl<sub>3</sub>) δ 184.2 (d, *J* = 4 Hz), 160.3, 147.0, 141.5 (d, *J* = 25 Hz), 138.4 (d, *J* = 25 Hz), 133.2, 132.0, 131.2, 131.0 (d, *J* = 8 Hz), 125.1, 124.1 (d, *J* = 4 Hz), 120.3, 102.7 (d, *J* = 212 Hz), 22.2. HRMS (ESI-TOF) *m/z* calcd for C<sub>14</sub>H<sub>9</sub>FO<sub>3</sub> (M-H)<sup>-</sup> 243.0463, found 243.0464. <sup>19</sup>F NMR(376 MHz, CDCl<sub>3</sub>): -90.8 ppm.

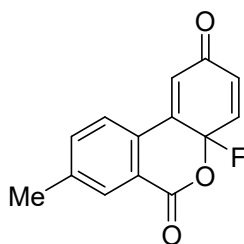

4a-fluoro-8-methyl-6H-benzo[c]chromene-2,6(4aH)-dione (**2d**). Purification was performed by column chromatography (petroleum ether / ethyl acetate = 10 / 1) to afford 67.6 mg (92%) of **2d**. yellowish solid. mp 144-145 °C.  $^1\text{H}$  NMR (500 MHz,  $\text{CDCl}_3$ )  $\delta$  8.10 (d,  $J$  = 8 Hz, 1H), 7.54 (s, 1H), 7.48 (d,  $J$  = 8 Hz, 1H), 6.97 (dd,  $J$  = 10, 5 Hz, 1H), 6.69 (s, 1H), 6.44 (d,  $J$  = 10 Hz, 1H), 2.53 (s, 3H).  $^{13}\text{C}$  {H} NMR (126 MHz,  $\text{CDCl}_3$ )  $\delta$  184.1 (d,  $J$  = 5 Hz), 160.3, 147.0, 141.4 (d,  $J$  = 25 Hz), 138.4 (d,  $J$  = 25 Hz), 133.2, 132.0, 131.1, 131.0 (d,  $J$  = 8 Hz), 125.2, 124.1 (d,  $J$  = 4 Hz), 120.2, 102.7 (d,  $J$  = 212 Hz), 22.2. HRMS (ESI-TOF)  $m/z$  calcd for  $\text{C}_{14}\text{H}_9\text{FO}_3$  (M-H) $^-$  243.0463, found 243.0462.  $^{19}\text{F}$  NMR(376 MHz,  $\text{CDCl}_3$ ): -90.8 ppm.

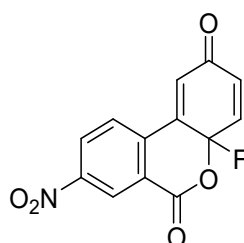

4a-fluoro-8-nitro-6H-benzo[c]chromene-2,6(4aH)-dione (**2e**). Purification was performed by column chromatography (petroleum ether / ethyl acetate = 10 / 1) to afford 60.4 mg (73%) of **2e**. yellowish solid. mp 157-159 °C.  $^1\text{H}$  NMR (500 MHz,  $\text{CDCl}_3$ )  $\delta$  9.05 (s, 1H), 8.63 (d,  $J$  = 8 Hz, 1H), 7.99 (d,  $J$  = 8 Hz, 1H), 7.04 (dd,  $J$  = 10, 4 Hz, 1H), 6.85 (s, 1H), 6.52 (d,  $J$  = 10 Hz, 1H).  $^{13}\text{C}$  {H} NMR (126 MHz,  $\text{CDCl}_3$ )  $\delta$  183.2 (d,  $J$  = 4 Hz), 158.4, 149.8, 139.0 (d,  $J$  = 25 Hz), 137.9 (d,  $J$  = 25 Hz), 137.2, 131.4 (d,  $J$  = 8 Hz), 129.7, 126.9 (d,  $J$  = 5 Hz), 126.6, 126.3, 124.4, 102.6 (d,  $J$  = 215 Hz). HRMS (ESI-TOF)  $m/z$  calcd for  $\text{C}_{13}\text{H}_6\text{FNO}_5$  (M-H) $^-$  274.0157, found 274.0152.  $^{19}\text{F}$  NMR(376 MHz,  $\text{CDCl}_3$ ): -91.1 ppm.

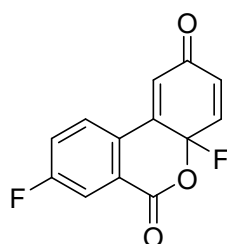

4a,8-difluoro-6H-benzo[c]chromene-2,6(4aH)-dione (**2f**). Purification was performed by column chromatography (petroleum ether / ethyl acetate = 10 / 1) to afford 50.8 mg (68%) of **2f**. yellowish solid. mp 151-152 °C.  $^1\text{H}$  NMR (500 MHz,  $\text{CDCl}_3$ )  $\delta$  7.91 (dd,  $J$  = 8, 2.5 Hz, 1H), 7.78 (dd,  $J$  = 8, 5 Hz, 1H), 7.51 (dt,  $J$  = 8, 2.5 Hz, 1H), 6.98 (dd,  $J$  = 10, 4 Hz, 1H), 6.67 (d,  $J$  = 1 Hz, 1H), 6.46 (d,  $J$  = 10 Hz, 1H).  $^{13}\text{C}$  {H} NMR (126 MHz,  $\text{CDCl}_3$ )  $\delta$  183.8 (d,  $J$  = 5 Hz), 164.6 (d,  $J$  = 250 Hz), 159.3 (d,  $J$  = 3 Hz), 140.2 (d,  $J$  = 25 Hz), 137.9 (d,  $J$  = 25 Hz), 131.3 (d,  $J$  = 8 Hz), 128.3 (d,  $J$  = 3 Hz), 127.4 (d,  $J$  = 8 Hz), 125.1 (d,  $J$  = 8 Hz), 124.3 (d,  $J$  = 3 Hz), 123.4 (d,  $J$  = 25 Hz), 117.8 (d,  $J$  = 25 Hz), 102.7 (d,  $J$  = 213 Hz). HRMS (ESI-TOF)  $m/z$  calcd for  $\text{C}_{13}\text{H}_6\text{F}_2\text{O}_3$  (M-H) $^-$  247.0212, found 247.0212.  $^{19}\text{F}$  NMR(376 MHz,  $\text{CDCl}_3$ ): -90.8, -99.3 ppm.

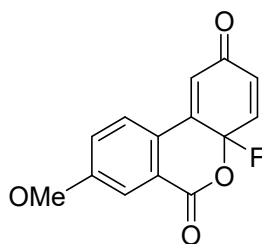

4a-fluoro-8-methoxy-6H-benzo[c]chromene-2,6(4aH)-dione (**2g**). Purification was performed by column chromatography (petroleum ether / ethyl acetate = 10 / 1) to afford 63.4 mg (81%) of **2g**. yellowish solid. mp 143-144 °C. <sup>1</sup>H NMR (500 MHz, CDCl<sub>3</sub>) δ 7.66-7.68 (m, 2H), 7.30 (dd, *J* = 10, 3 Hz, 1H), 6.95 (dd, *J* = 10, 4 Hz, 1H), 6.60 (d, *J* = 2 Hz, 1H), 6.42 (d, *J* = 10 Hz, 1H), 3.93 (s, 3H). <sup>13</sup>C {<sup>1</sup>H} NMR (126 MHz, CDCl<sub>3</sub>) δ 184.1 (d, *J* = 5 Hz), 162.7, 160.4, 141.2 (d, *J* = 25 Hz), 137.9 (d, *J* = 25 Hz), 131.3 (d, *J* = 6 Hz), 126.6, 124.6, 124.3, 123.3, 122.6 (d, *J* = 4 Hz), 113.8, 102.8 (d, *J* = 212 Hz), 56.2. HRMS (ESI-TOF) *m/z* calcd for C<sub>14</sub>H<sub>9</sub>FO<sub>4</sub> (M-H)<sup>-</sup> 259.0412, found 259.0410. <sup>19</sup>F NMR(376 MHz, CDCl<sub>3</sub>): -88.6 ppm.

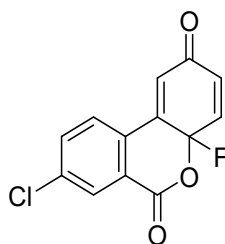

8-chloro-4a-fluoro-6H-benzo[c]chromene-2,6(4aH)-dione (**2h**). Purification was performed by column chromatography (petroleum ether / ethyl acetate = 10 / 1) to afford 60.4 mg (76%) of **2h**. yellowish solid. mp 145-146 °C. <sup>1</sup>H NMR (500 MHz, CDCl<sub>3</sub>) δ 8.20 (s, 1H), 7.76 (d, *J* = 8 Hz, 1H), 7.70 (d, *J* = 8 Hz, 1H), 6.98 (dd, *J* = 10, 4 Hz, 1H), 6.70 (s, 1H), 6.46 (d, *J* = 10 Hz, 1H). <sup>13</sup>C {<sup>1</sup>H} NMR (126 MHz, CDCl<sub>3</sub>) δ 183.7 (d, *J* = 5 Hz), 159.2, 140.1 (d, *J* = 25 Hz), 138.7, 138.0 (d, *J* = 25 Hz), 135.7, 131.2 (d, *J* = 8 Hz), 130.9, 130.4, 126.4, 124.6 (d, *J* = 4 Hz), 124.2, 102.6 (d, *J* = 213 Hz). HRMS (ESI-TOF) *m/z* calcd for C<sub>13</sub>H<sub>6</sub>ClFO<sub>3</sub> (M-H)<sup>-</sup> 262.9916, found 262.9920. <sup>19</sup>F NMR(376 MHz, CDCl<sub>3</sub>): -90.3 ppm.

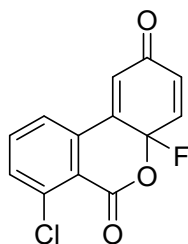

7-chloro-4a-fluoro-6H-benzo[c]chromene-2,6(4aH)-dione (**2i**). Purification was performed by column chromatography (petroleum ether / ethyl acetate = 10 / 1) to afford 57.2 mg (72%) of **2i**. yellowish solid. mp 147-148 °C. <sup>1</sup>H NMR (500 MHz, CDCl<sub>3</sub>) δ 7.64-7.73 (m, 3H), 6.98 (dd, *J* = 10, 5 Hz, 1H), 6.69 (s, 1H), 6.46 (d, *J* = 10 Hz, 1H). <sup>13</sup>C {<sup>1</sup>H} NMR (126 MHz, CDCl<sub>3</sub>) δ 183.8 (d, *J* = 4 Hz), 156.6, 141.9 (d, *J* = 25 Hz), 138.4, 138.0 (d, *J* = 25 Hz), 135.2 (d, *J* = 8 Hz), 134.6, 131.0 (d, *J* = 8 Hz), 124.9 (d, *J* = 4 Hz), 123.9, 120.3, 102.1 (d, *J* = 213 Hz). HRMS (ESI-TOF) *m/z* calcd for C<sub>13</sub>H<sub>6</sub>ClFO<sub>3</sub> (M-H)<sup>-</sup> 262.9916, found 262.9913. <sup>19</sup>F NMR(376 MHz, CDCl<sub>3</sub>): -94.2 ppm.

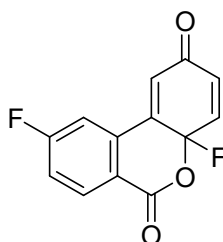

4a,9-difluoro-6*H*-benzo[*c*]chromene-2,6(4*aH*)-dione (**2j**). Purification was performed by column chromatography (petroleum ether / ethyl acetate = 10 / 1) to afford 50.8 mg (68%) of **2j**. yellowish solid. mp 141-143 °C. <sup>1</sup>H NMR (500 MHz, CDCl<sub>3</sub>) δ 8.27 (dd, *J* = 8, 5 Hz, 1H), 7.42 (d, *J* = 8 Hz, 1H), 7.36 (t, *J* = 8 Hz, 1H), 6.99 (dd, *J* = 10, 4 Hz, 1H), 6.69 (s, 1H), 6.46 (d, *J* = 10 Hz, 1H). <sup>13</sup>C {<sup>1</sup>H} NMR (126 MHz, CDCl<sub>3</sub>) δ 183.7 (d, *J* = 5 Hz), 166.9 (d, *J* = 256 Hz), 159.3, 140.2 (d, *J* = 25 Hz), 138.2 (d, *J* = 25 Hz), 134.8 (d, *J* = 10 Hz), 134.3 (d, *J* = 10 Hz), 131.1 (d, *J* = 6 Hz), 125.2 (d, *J* = 5 Hz), 119.8 (d, *J* = 25 Hz), 119.2 (d, *J* = 4 Hz), 111.8 (d, *J* = 25 Hz), 102.6 (d, *J* = 218 Hz). HRMS (ESI-TOF) *m/z* calcd for C<sub>13</sub>H<sub>6</sub>F<sub>2</sub>O<sub>3</sub> (M-H)<sup>-</sup> 247.0212, found 247.0211. <sup>19</sup>F NMR(376 MHz, CDCl<sub>3</sub>): -90.6, -104.4 ppm.

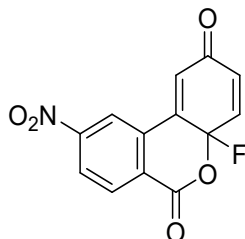

4a-fluoro-9-nitro-6*H*-benzo[*c*]chromene-2,6(4*aH*)-dione (**2k**). Purification was performed by column chromatography (petroleum ether / ethyl acetate = 10 / 1) to afford 62.9 mg (76%) of **2k**. yellowish solid. mp 167-168 °C. <sup>1</sup>H NMR (500 MHz, CDCl<sub>3</sub>) δ 8.60 (d, *J* = 2 Hz, 1H), 8.45-8.50 (m, 2H), 7.03 (dd, *J* = 10, 4 Hz, 1H), 6.87 (d, *J* = 2 Hz, 1H), 6.53 (d, *J* = 10 Hz, 1H). <sup>13</sup>C {<sup>1</sup>H} NMR (126 MHz, CDCl<sub>3</sub>) δ 183.2 (d, *J* = 4 Hz), 158.6, 152.0, 139.0 (d, *J* = 25 Hz), 137.7 (d, *J* = 25 Hz), 133.7, 132.9, 131.5 (d, *J* = 8 Hz), 127.4, 126.3 (d, *J* = 5 Hz), 126.2, 120.2, 102.7 (d, *J* = 213 Hz). HRMS (ESI-TOF) *m/z* calcd for C<sub>13</sub>H<sub>6</sub>FNO<sub>5</sub> (M-H)<sup>-</sup> 274.0157, found 274.0155. <sup>19</sup>F NMR(376 MHz, CDCl<sub>3</sub>): -91.1 ppm.

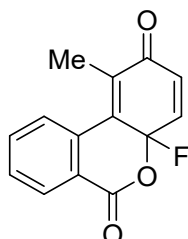

4a-fluoro-1-methyl-6*H*-benzo[*c*]chromene-2,6(4*aH*)-dione (**2l**). Purification was performed by column chromatography (petroleum ether / ethyl acetate = 10 / 1) to afford 38.1 mg (52%) of **2l**. yellowish solid. mp 161-162 °C. <sup>1</sup>H NMR (500 MHz, CDCl<sub>3</sub>) δ 8.22 (d, *J* = 8 Hz, 1H), 8.64-8.80 (m, 3H), 6.93 (dd, *J* = 10, 4 Hz, 1H), 6.46 (d, *J* = 8 Hz, 1H), 2.24 (s, 3H). <sup>13</sup>C {<sup>1</sup>H} NMR (126 MHz, CDCl<sub>3</sub>) δ 184.6 (d, *J* = 4 Hz), 160.8, 137.9 (d, *J* = 25 Hz), 135.8 (d, *J* = 25 Hz), 134.4, 134.1, 132.9, 130.8 (d, *J* = 8 Hz), 130.6 (d, *J* = 5 Hz), 128.9, 124.4, 103.4 (d, *J* = 213 Hz), 12.8. HRMS (ESI-TOF) *m/z* calcd for C<sub>14</sub>H<sub>9</sub>FO<sub>3</sub> (M+H)<sup>+</sup> 267.0427, found 267.0430. <sup>19</sup>F NMR(376 MHz, CDCl<sub>3</sub>): -95.9 ppm.

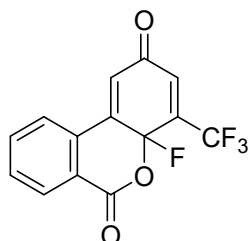

4a-fluoro-4-(trifluoromethyl)-6*H*-benzo[*c*]chromene-2,6(4*aH*)-dione (**2m**). Purification was performed by column chromatography (petroleum ether / ethyl acetate = 10 / 1) to afford 33.9 mg (38%) of **2m**. yellowish solid. mp 164-165 °C. <sup>1</sup>H NMR (500 MHz, CDCl<sub>3</sub>) δ 8.26 (d, *J* = 8 Hz, 1H), 7.74-7.84 (m, 3H), 6.86 (s, 4 Hz, 1H), 6.80 (s, 1H). <sup>13</sup>C {<sup>1</sup>H} NMR (126 MHz, CDCl<sub>3</sub>) δ 182.2 (d, *J* = 4 Hz), 158.5, 142.0 (d, *J* = 25 Hz), 137.8 (dt, *J* = 25, 10 Hz), 135.8, 132.9, 132.2 (t, *J* = 6 Hz), 131.3, 131.2, 125.3, 123.5 (d, *J* = 5 Hz), 122.7, 120.9 (d, *J* = 275 Hz), 102.2 (d, *J* = 213 Hz). HRMS (ESI-TOF) *m/z* calcd for C<sub>14</sub>H<sub>6</sub>F<sub>4</sub>O<sub>3</sub> (M-H)<sup>-</sup> 297.0180, found 297.0178. <sup>19</sup>F NMR(376 MHz, CDCl<sub>3</sub>): -63.1, -90.9 ppm.

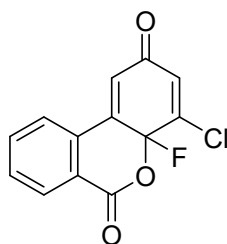

4-chloro-4a-fluoro-6H-benzo[c]chromene-2,6(4aH)-dione (**2n**). Purification was performed by column chromatography (petroleum ether / ethyl acetate = 10 / 1) to afford 24.4 mg (31%) of **2n**. yellowish solid. mp 164-165 °C.  $^1\text{H}$  NMR (500 MHz,  $\text{CDCl}_3$ )  $\delta$  8.25 (d,  $J$  = 8 Hz, 1H), 7.72-7.83 (m, 3H), 6.72 (s, 4 Hz, 1H), 6.66 (s, 1H).  $^{13}\text{C}$  {H} NMR (126 MHz,  $\text{CDCl}_3$ )  $\delta$  181.7 (d,  $J$  = 4 Hz), 159.1, 146.1 (d,  $J$  = 25 Hz), 141.6 (d,  $J$  = 25 Hz), 135.8, 132.5, 131.8, 131.2, 130.2 (d,  $J$  = 4 Hz), 124.9, 124.2, 122.8, 101.2 (d,  $J$  = 221 Hz). HRMS (ESI-TOF)  $m/z$  calcd for  $\text{C}_{13}\text{H}_6\text{ClFO}_3$  (M-H) $^-$  262.9916, found 262.9914.  $^{19}\text{F}$  NMR(376 MHz,  $\text{CDCl}_3$ ): -93.8 ppm.

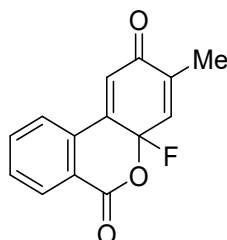

4a-fluoro-3-methyl-6H-benzo[c]chromene-2,6(4aH)-dione (**2o**). Purification was performed by column chromatography (petroleum ether / ethyl acetate = 10 / 1) to afford 19.7 mg (27%) of **2o**. yellowish solid. mp 164-165 °C.  $^1\text{H}$  NMR (500 MHz,  $\text{CDCl}_3$ )  $\delta$  8.23 (d,  $J$  = 8 Hz, 1H), 7.67-7.79 (m, 3H), 6.76 (d,  $J$  = 1.5 Hz, 1H), 6.69 (s, 1H), 2.03 (t,  $J$  = 2.5 Hz, 3H).  $^{13}\text{C}$  {H} NMR (126 MHz,  $\text{CDCl}_3$ )  $\delta$  184.9 (d,  $J$  = 4 Hz), 160.6, 141.1 (d,  $J$  = 10 Hz), 139.0 (d,  $J$  = 10 Hz), 135.4, 133.9, 133.6, 132.4 (d,  $J$  = 4 Hz), 131.0, 124.8, 124.4 (d,  $J$  = 4 Hz), 122.9, 102.3 (d,  $J$  = 208 Hz), 15.4. HRMS (ESI-TOF)  $m/z$  calcd for  $\text{C}_{14}\text{H}_9\text{FO}_3$  (M+Na) $^+$  267.0427, found 267.0431.  $^{19}\text{F}$  NMR(376 MHz,  $\text{CDCl}_3$ ): -90.3 ppm.

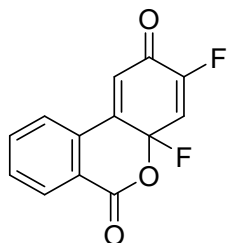

3,4a-difluoro-6H-benzo[c]chromene-2,6(4aH)-dione (**2p**). Purification was performed by column chromatography (petroleum ether / ethyl acetate = 10 / 1) to afford 11.6 mg (29%) of **2p**. yellowish solid. mp 164-165 °C.  $^1\text{H}$  NMR (500 MHz,  $\text{CDCl}_3$ )  $\delta$  8.25 (d,  $J$  = 8 Hz, 1H), 7.73-7.83 (m, 3H), 6.70 (d,  $J$  = 6 Hz, 1H), 6.60 (dd,  $J$  = 3.5, 5 Hz, 1H).  $^{13}\text{C}$  {H} NMR (126 MHz,  $\text{CDCl}_3$ )  $\delta$  177.1 (dd,  $J$  = 4, 20 Hz), 159.7, 155.6 (dd,  $J$  = 10, 275 Hz), 142,5 (d,  $J$  = 30 Hz), 135.7, 132.8, 131.4, 131.3, 125.1, 122.8, 122.5 (d,  $J$  = 4 Hz), 115.6 (d,  $J$  = 4 Hz), 105.7 (dd,  $J$  = 15, 213 Hz). HRMS (ESI-TOF)  $m/z$  calcd for  $\text{C}_{13}\text{H}_6\text{F}_2\text{O}_3$  (M-H) $^-$  247.0212, found 247.0210.  $^{19}\text{F}$  NMR(376 MHz,  $\text{CDCl}_3$ ): -87.3, -123.7 ppm.



### 3. Copies of $^1\text{H}$ -NMR, $^{13}\text{C}$ -NMR, $^{19}\text{F}$ -NMR and HRMS spectra of products

#### 4a-fluoro-6*H*-benzo[*c*]chromene-2,6(4*aH*)-dione (**2a**)

$^1\text{H}$  NMR (500 MHz,  $\text{CDCl}_3$ )

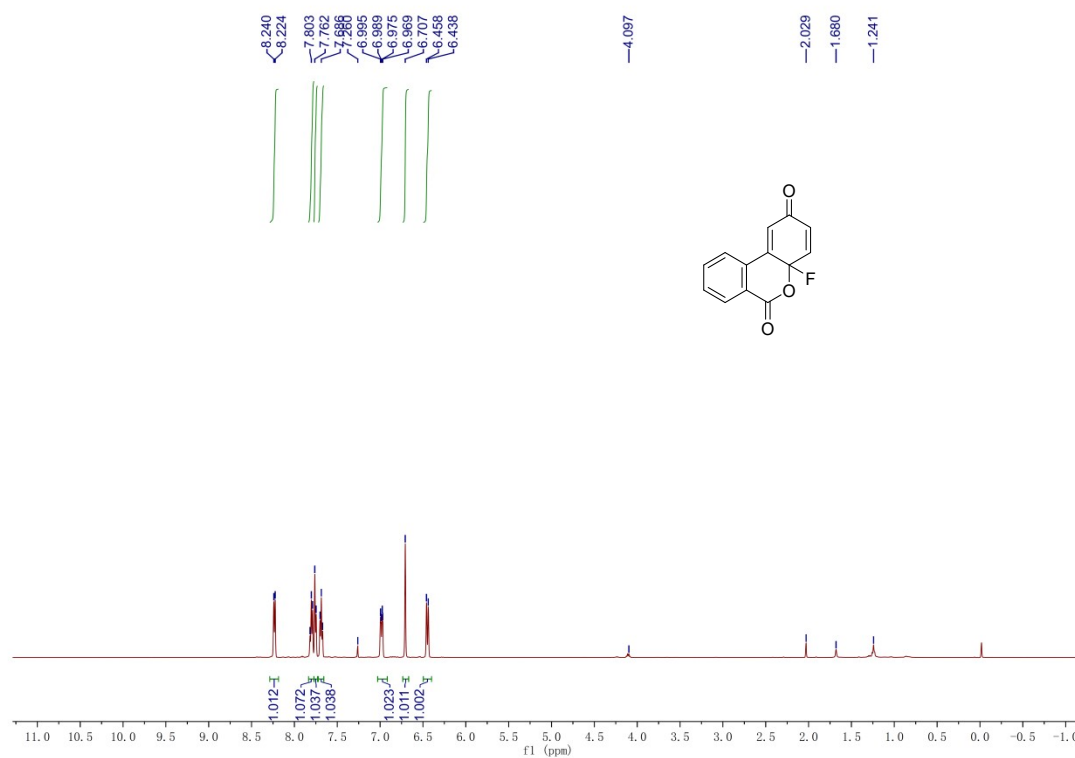

$^{13}\text{C}$  { $^1\text{H}$ } NMR (126 MHz,  $\text{CDCl}_3$ )

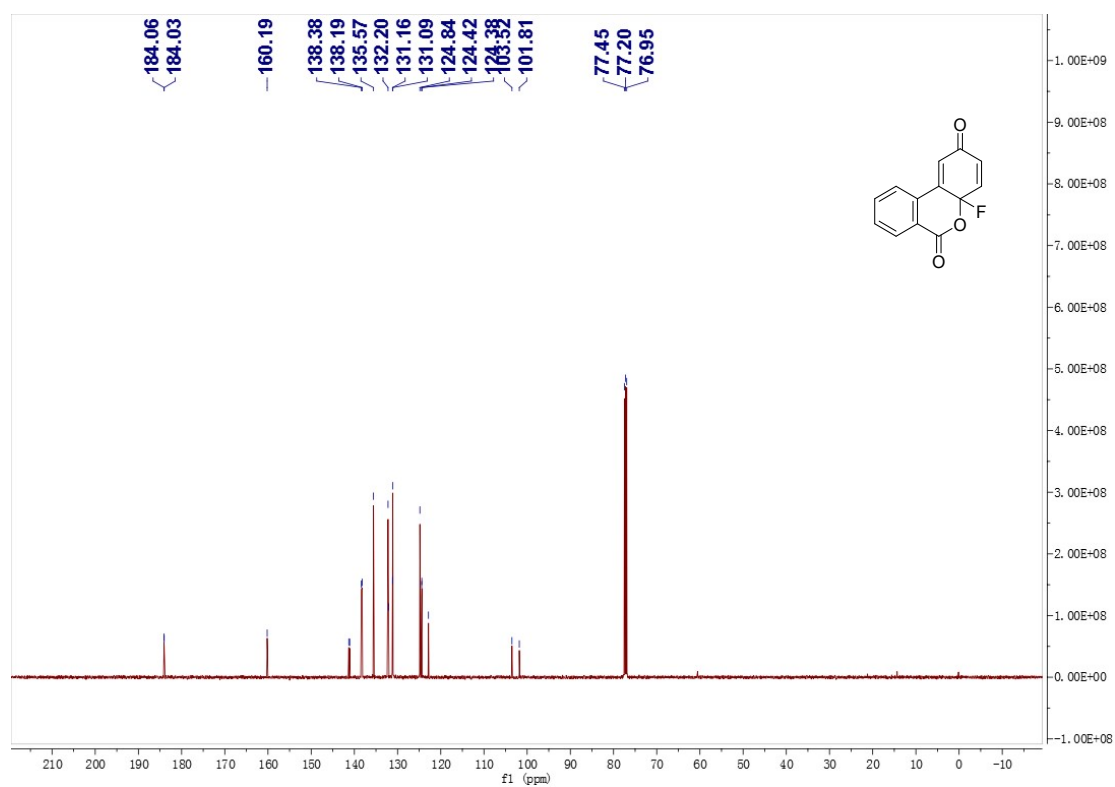

$^{19}\text{F}$  NMR(376 MHz,  $\text{CDCl}_3$ )

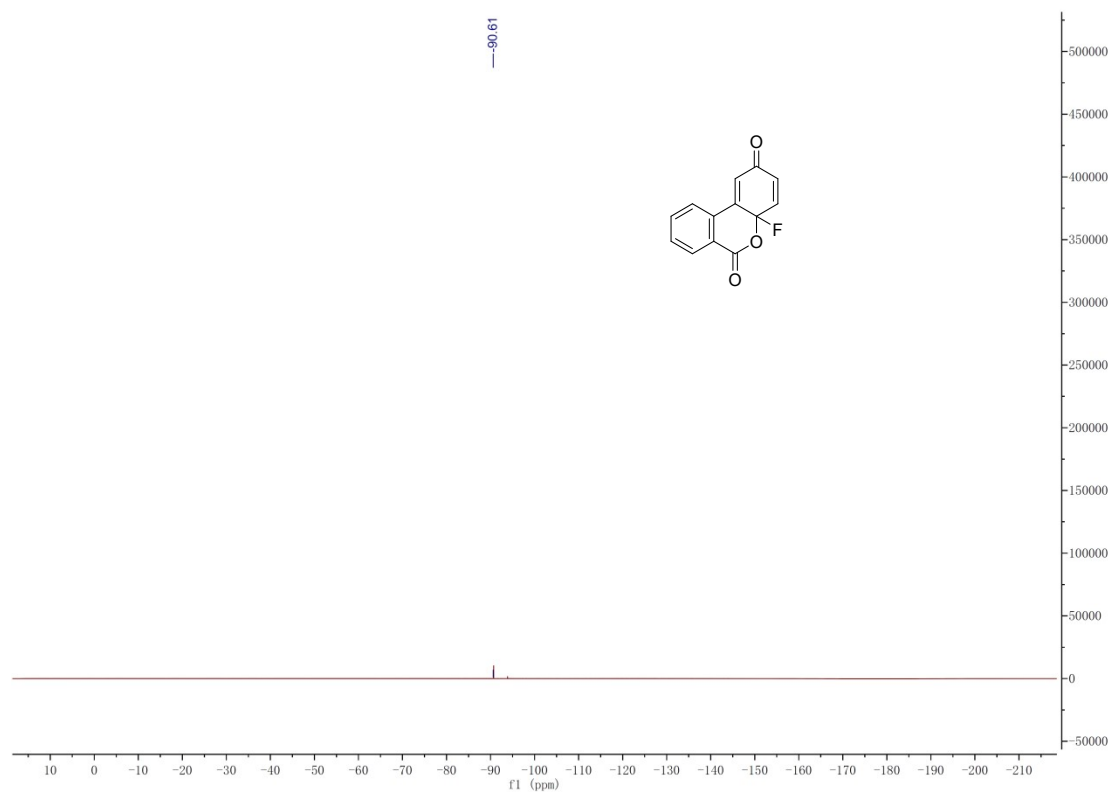

HRMS (ESI-TOF)  $m/z$  calcd for  $\text{C}_{13}\text{H}_7\text{FO}_3$  ( $\text{M}-\text{H}$ ) $^-$  229.0307, found 229.0303.

### Acquisition Parameter

|                          |            |                   |     |                       |                          |
|--------------------------|------------|-------------------|-----|-----------------------|--------------------------|
| Polarity                 | Negative   | n/a               | n/a | No. of Laser Shots    | 200                      |
| n/a                      | n/a        | No. of Cell Fills | 1   | Laser Power           | 20.0 lp                  |
| Broadband Low Mass       | 200.7 m/z  | n/a               | n/a | n/a                   | n/a                      |
| Broadband High Mass      | 1000.0 m/z | n/a               | n/a | n/a                   | n/a                      |
| Acquisition Mode         | Single MS  | n/a               | n/a | Calibration Date      | Wed Jun 17 02:41:42      |
| Pulse Program            | basic      | n/a               | n/a | Data Acquisition Size | 1020576                  |
| Source Accumulation      | 0.500 sec  | n/a               | n/a | Apodization           | Sine-Bell Multiplication |
| Ion Accumulation Time    | 0.200 sec  | n/a               | n/a |                       |                          |
| Flight Time to Acq. Cell | 0.001 sec  |                   |     |                       |                          |

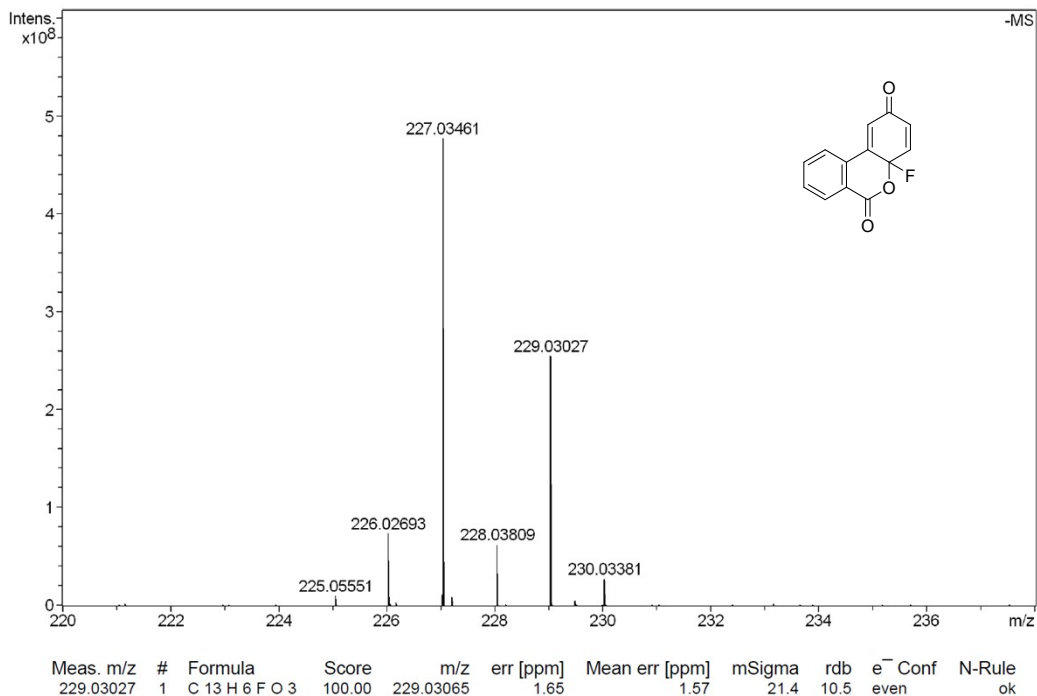

### 4a-fluoro-10-methyl-6H-benzo[c]chromene-2,6(4aH)-dione (**2b**)

<sup>1</sup>H NMR (500 MHz, CDCl<sub>3</sub>)

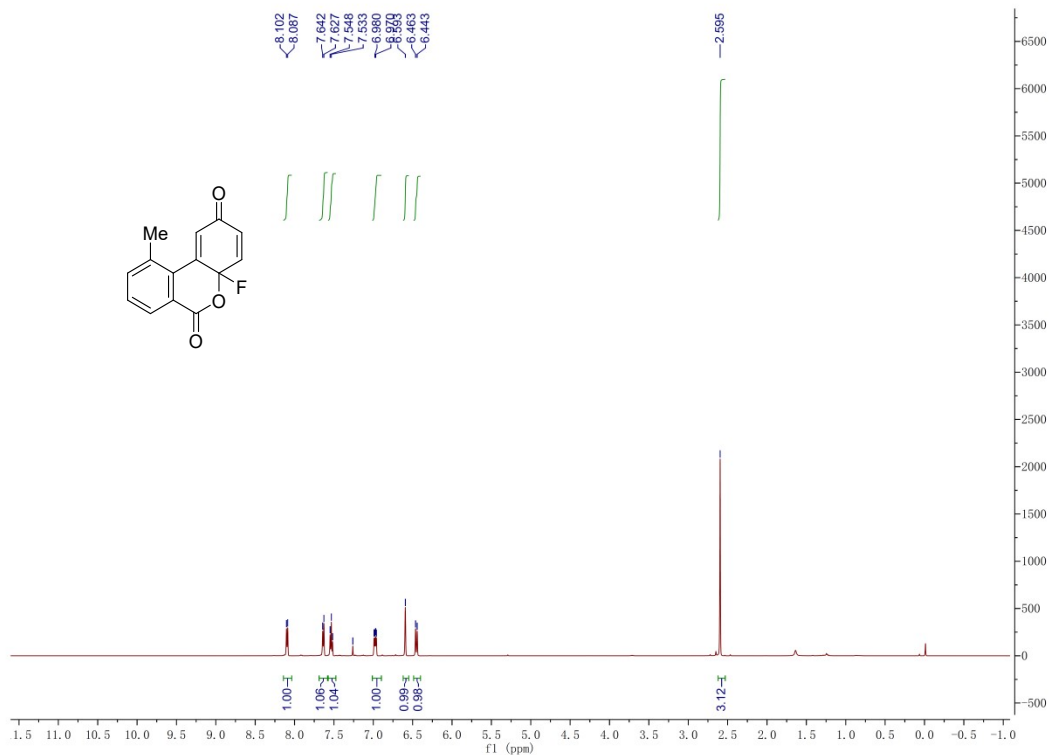

$^{13}\text{C}$  { $^1\text{H}$ } NMR (126 MHz,  $\text{CDCl}_3$ )

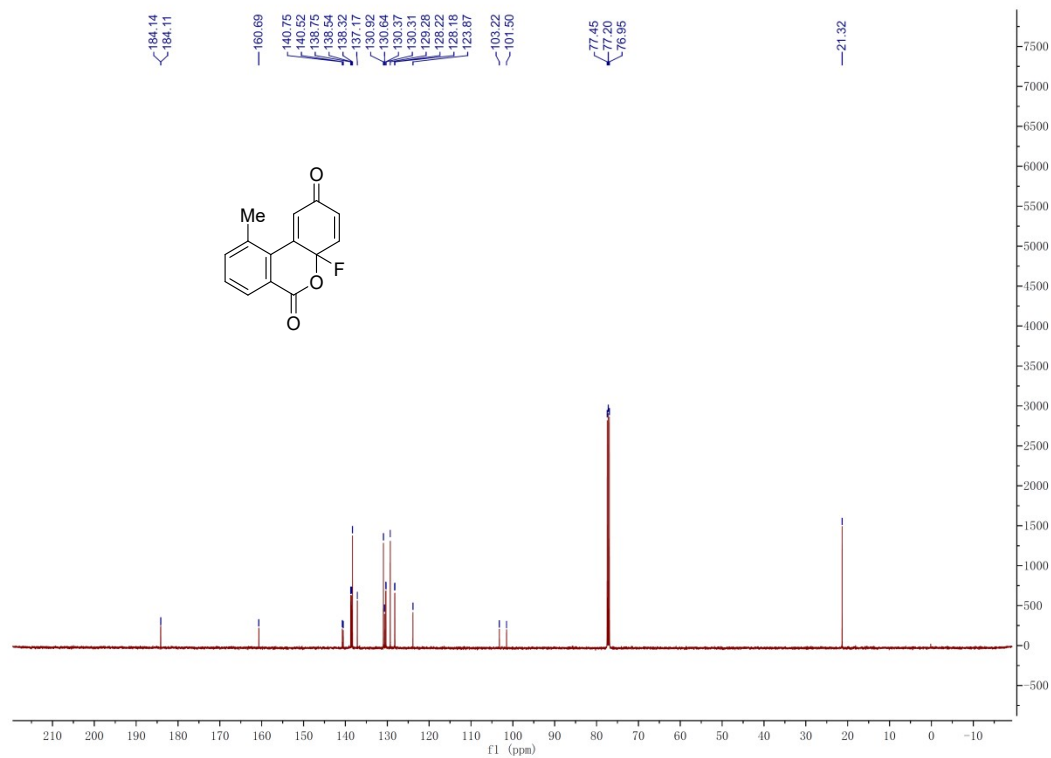

$^{19}\text{F}$  NMR(376 MHz,  $\text{CDCl}_3$ )

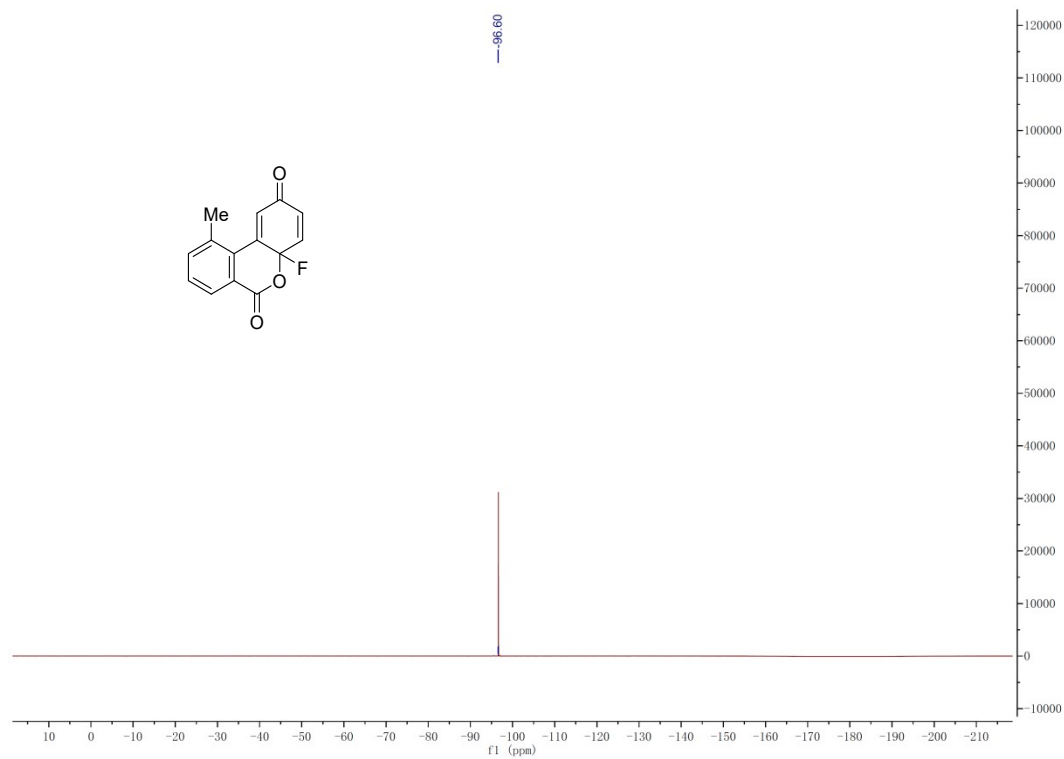

HRMS (ESI-TOF)  $m/z$  calcd for  $\text{C}_{14}\text{H}_9\text{FO}_3$  ( $\text{M}+\text{Na}$ ) $^+$  267.0428, found 267.0429.

**Acquisition Parameter**

|                          |            |                   |     |                       |                          |
|--------------------------|------------|-------------------|-----|-----------------------|--------------------------|
| Polarity                 | Positive   | n/a               | n/a | No. of Laser Shots    | 200                      |
| n/a                      | n/a        | No. of Cell Fills | 1   | Laser Power           | 20.0 lp                  |
| Broadband Low Mass       | 100.4 m/z  | n/a               | n/a | n/a                   | n/a                      |
| Broadband High Mass      | 1000.0 m/z | n/a               | n/a | n/a                   | n/a                      |
| Acquisition Mode         | Single MS  | n/a               | n/a | Calibration Date      | Wed Jun 17 02:41:42      |
| Pulse Program            | basic      | n/a               | n/a | Data Acquisition Size | 2028576                  |
| Source Accumulation      | 0.500 sec  | n/a               | n/a | Apodization           | Sine-Bell Multiplication |
| Ion Accumulation Time    | 0.200 sec  | n/a               | n/a |                       |                          |
| Flight Time to Acq. Cell | 0.001 sec  |                   |     |                       |                          |

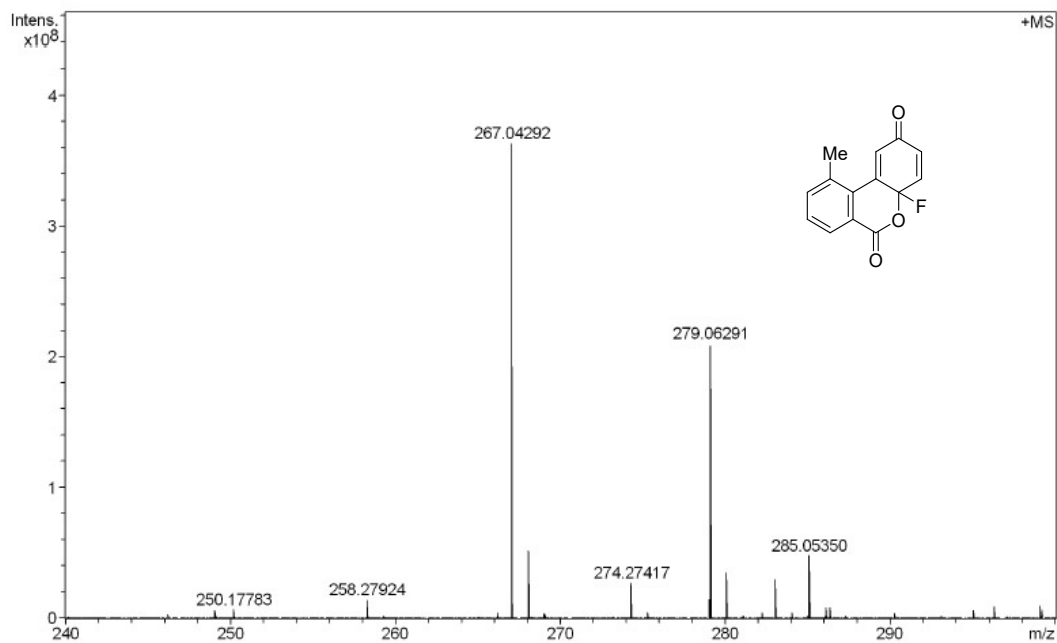

| Meas. m/z | # | Formula                                          | Score  | m/z       | err [ppm] | Mean err [ppm] | mSig ma | rdb | e <sup>-</sup> Conf | N-R ule |
|-----------|---|--------------------------------------------------|--------|-----------|-----------|----------------|---------|-----|---------------------|---------|
| 267.04292 | 1 | C <sub>14</sub> H <sub>9</sub> FNaO <sub>3</sub> | 100.00 | 267.04279 | -0.46     | -0.45          | 6.5     | 9.5 | even                | ok      |

4a-fluoro-9-methyl-6H-benzo[c]chromene-2,6(4aH)-dione (**2c**)

<sup>1</sup>H NMR (500 MHz, CDCl<sub>3</sub>)

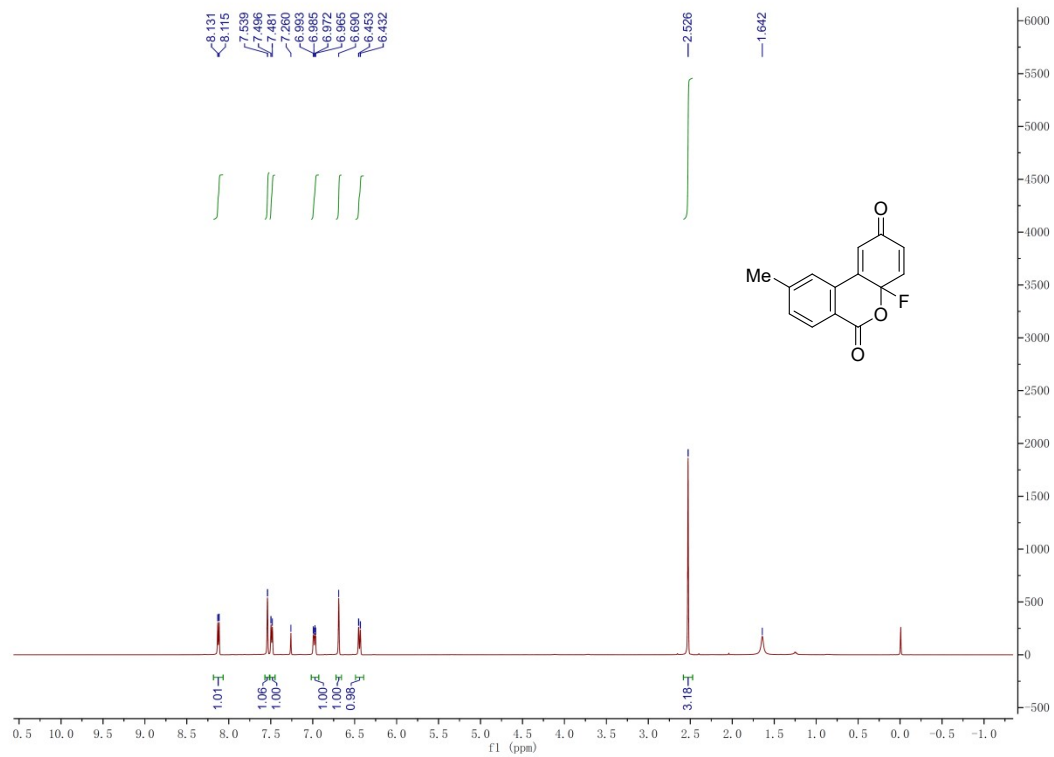

**<sup>13</sup>C {<sup>1</sup>H} NMR (126 MHz, CDCl<sub>3</sub>)**

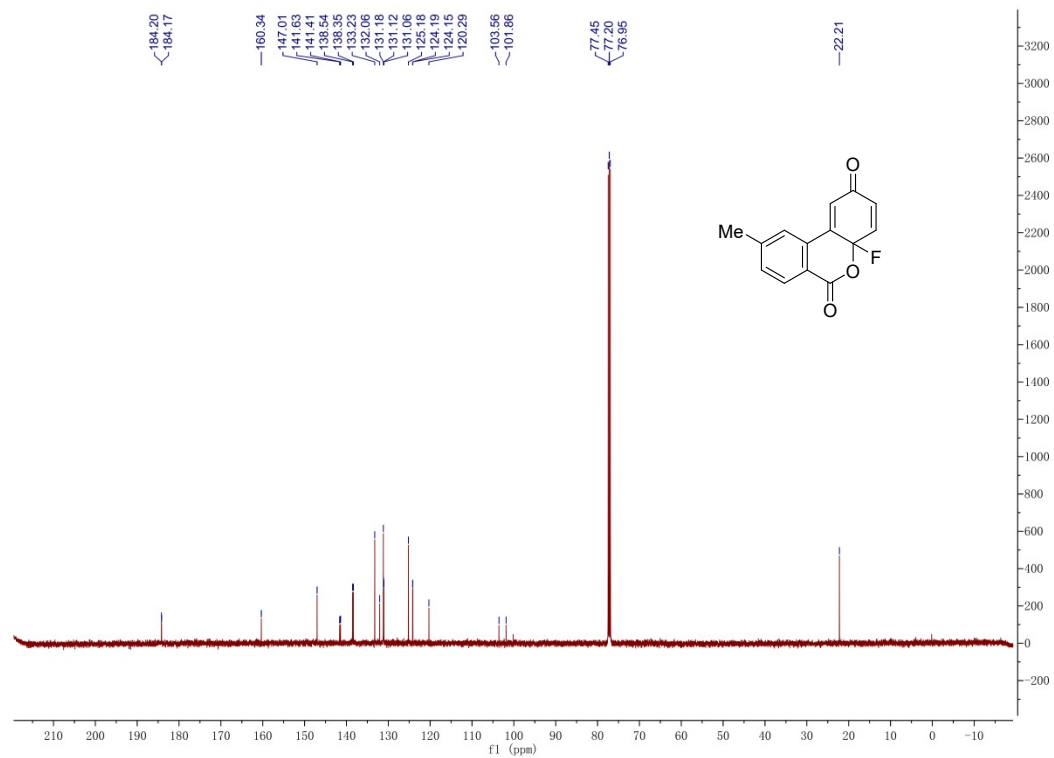

**<sup>19</sup>F NMR (376 MHz, CDCl<sub>3</sub>)**

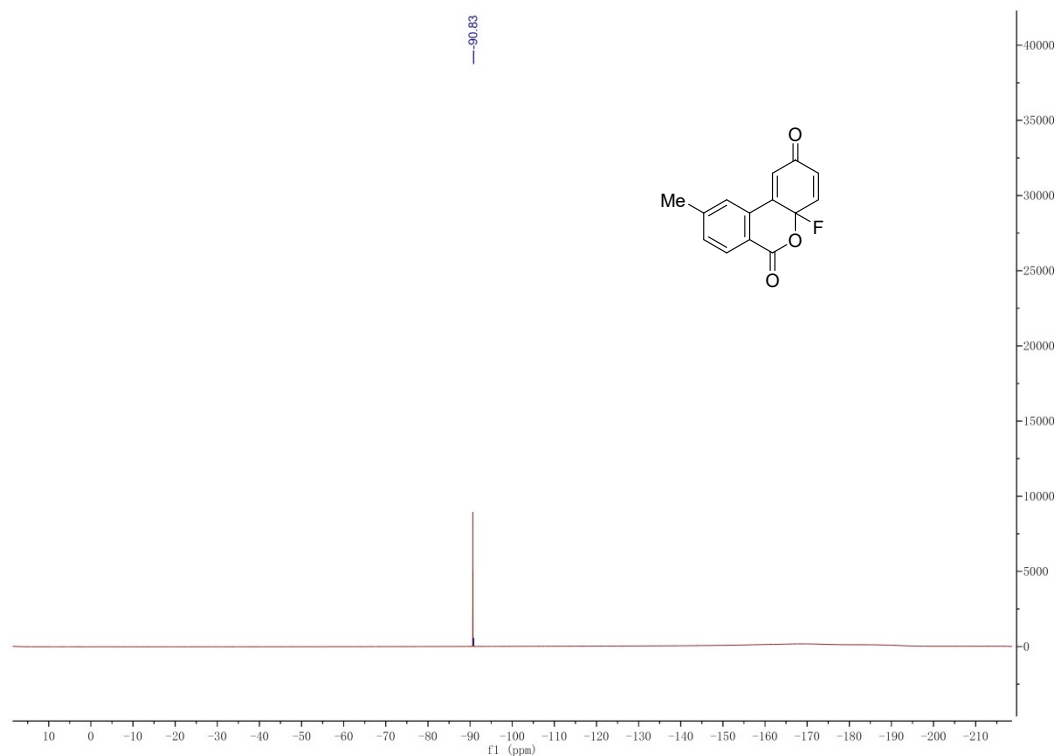

HRMS (ESI-TOF)  $m/z$  calcd for  $C_{14}H_9FO_3$  (M-H)<sup>-</sup> 243.0463, found 243.0465.

**Acquisition Parameter**

|                          |            |                   |     |                       |                          |
|--------------------------|------------|-------------------|-----|-----------------------|--------------------------|
| Polarity                 | Negative   | n/a               | n/a | No. of Laser Shots    | 200                      |
| n/a                      | n/a        | No. of Cell Fills | 1   | Laser Power           | 20.0 lp                  |
| Broadband Low Mass       | 200.7 m/z  | n/a               | n/a | n/a                   | n/a                      |
| Broadband High Mass      | 1000.0 m/z | n/a               | n/a | n/a                   | n/a                      |
| Acquisition Mode         | Single MS  | n/a               | n/a | Calibration Date      | Wed Jun 17 02:41:42      |
| Pulse Program            | basic      | n/a               | n/a | Data Acquisition Size | 2028576                  |
| Source Accumulation      | 0.500 sec  | n/a               | n/a | Apodization           | Sine-Bell Multiplication |
| Ion Accumulation Time    | 0.100 sec  | n/a               | n/a |                       |                          |
| Flight Time to Acq. Cell | 0.001 sec  |                   |     |                       |                          |

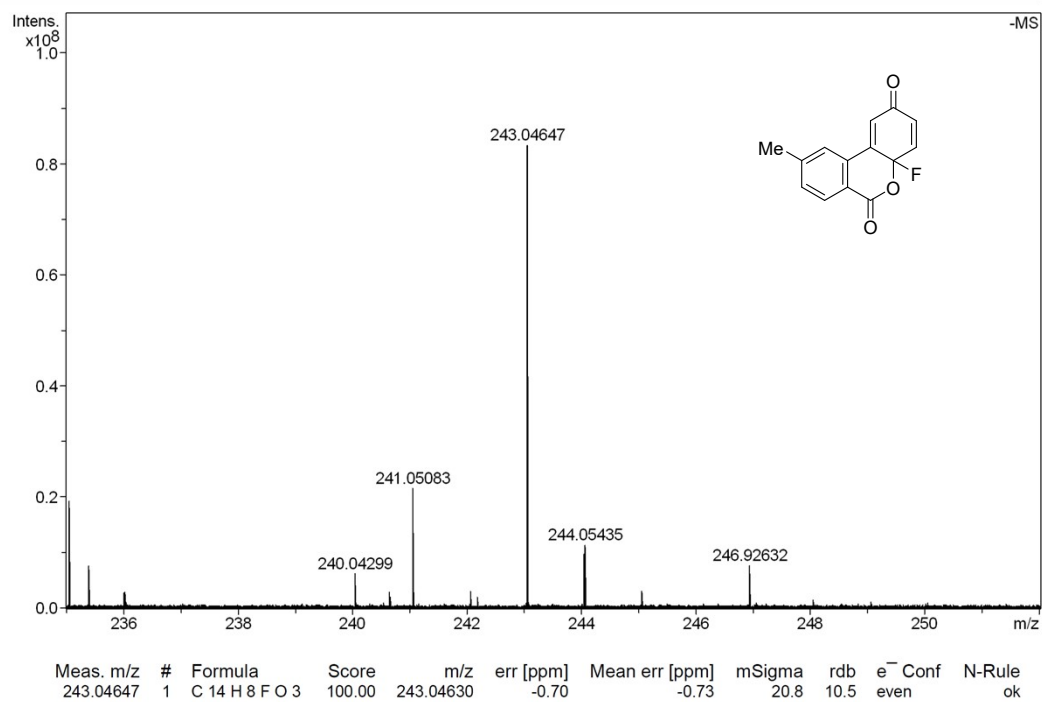

4a-fluoro-8-methyl-6H-benzo[c]chromene-2,6(4aH)-dione (**2d**)

<sup>1</sup>H NMR (500 MHz, CDCl<sub>3</sub>)

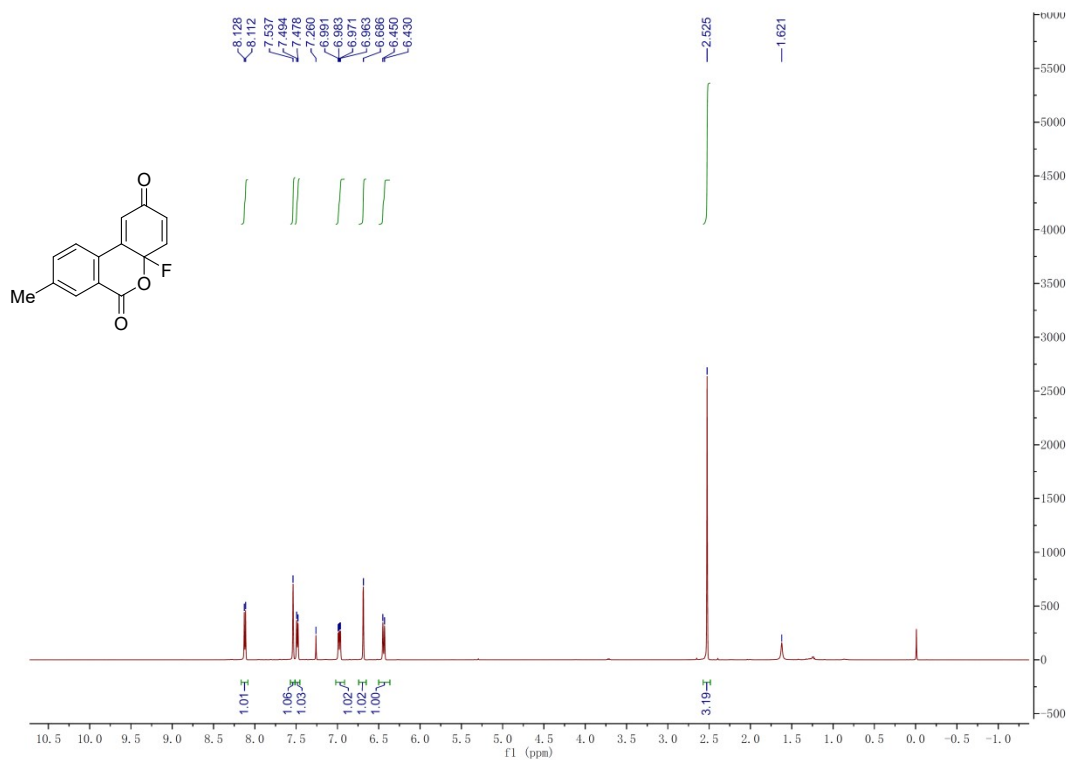

<sup>13</sup>C {<sup>1</sup>H} NMR (126 MHz, CDCl<sub>3</sub>)

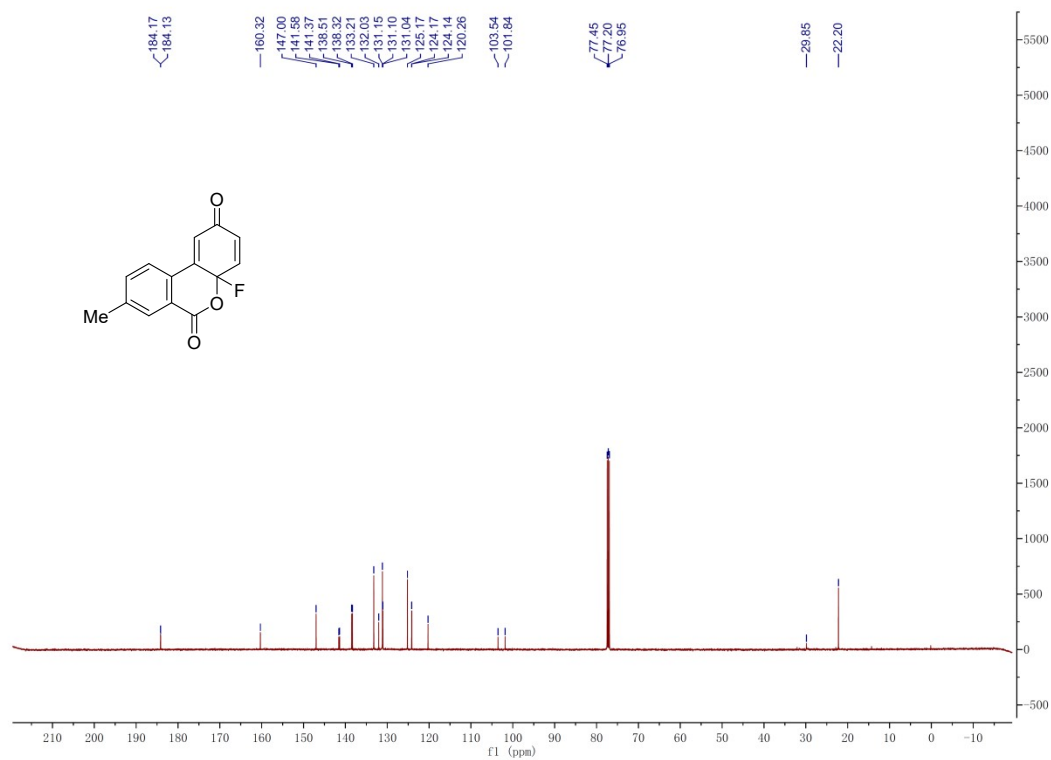

<sup>19</sup>F NMR (376 MHz, CDCl<sub>3</sub>)



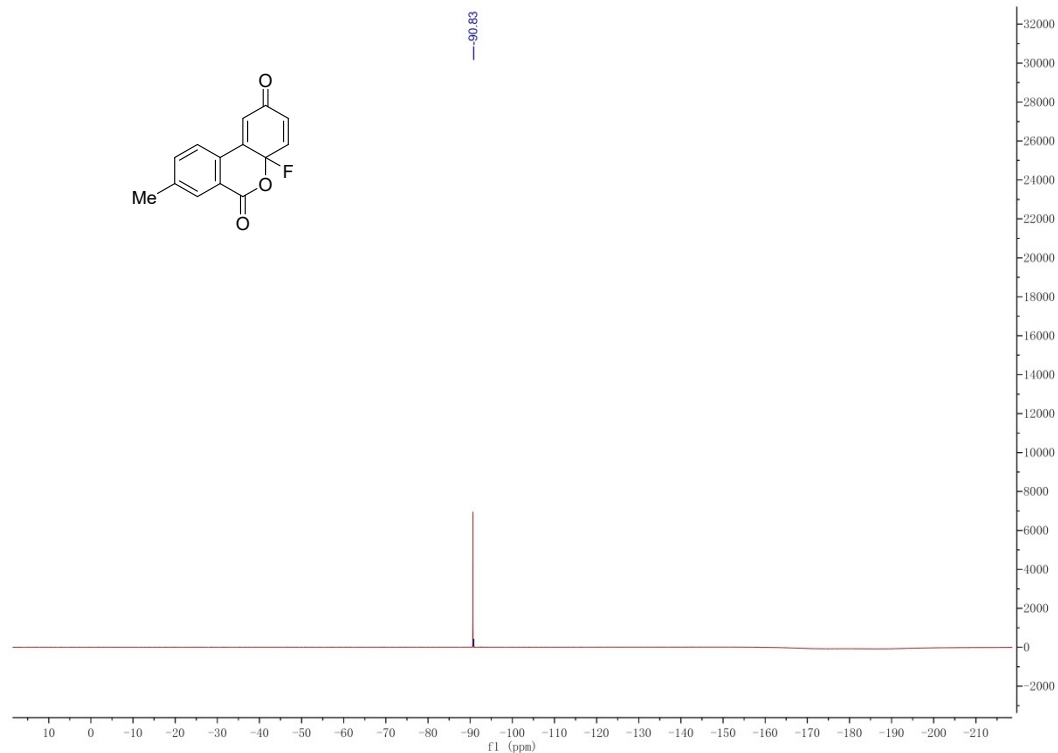

HRMS (ESI-TOF)  $m/z$  calcd for  $C_{14}H_9FO_3$  (M-H)<sup>-</sup> 243.0463, found 243.0462.

**Acquisition Parameter**

|                          |            |                   |     |                       |                          |
|--------------------------|------------|-------------------|-----|-----------------------|--------------------------|
| Polarity                 | Negative   | n/a               | n/a | No. of Laser Shots    | 200                      |
| n/a                      | n/a        | No. of Cell Fills | 1   | Laser Power           | 20.0 Ip                  |
| Broadband Low Mass       | 200.7 m/z  | n/a               | n/a | n/a                   | n/a                      |
| Broadband High Mass      | 1000.0 m/z | n/a               | n/a | n/a                   | n/a                      |
| Acquisition Mode         | Single MS  | n/a               | n/a | Calibration Date      | Wed Jun 17 02:41:42      |
| Pulse Program            | basic      | n/a               | n/a | Data Acquisition Size | 2020576                  |
| Source Accumulation      | 0.500 sec  | n/a               | n/a | Apodization           | Sine-Bell Multiplication |
| Ion Accumulation Time    | 0.200 sec  | n/a               | n/a |                       |                          |
| Flight Time to Acq. Cell | 0.001 sec  | n/a               | n/a |                       |                          |

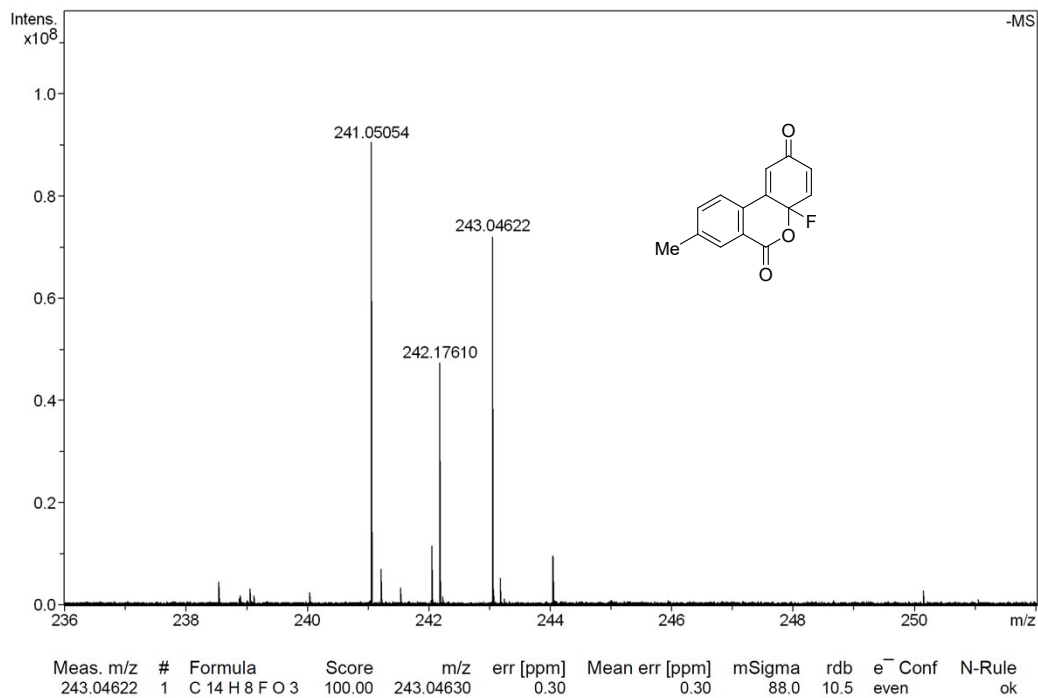

4a-fluoro-8-nitro-6H-benzo[c]chromene-2,6(4aH)-dione (**2e**)

$^1\text{H}$  NMR (500 MHz,  $\text{CDCl}_3$ )

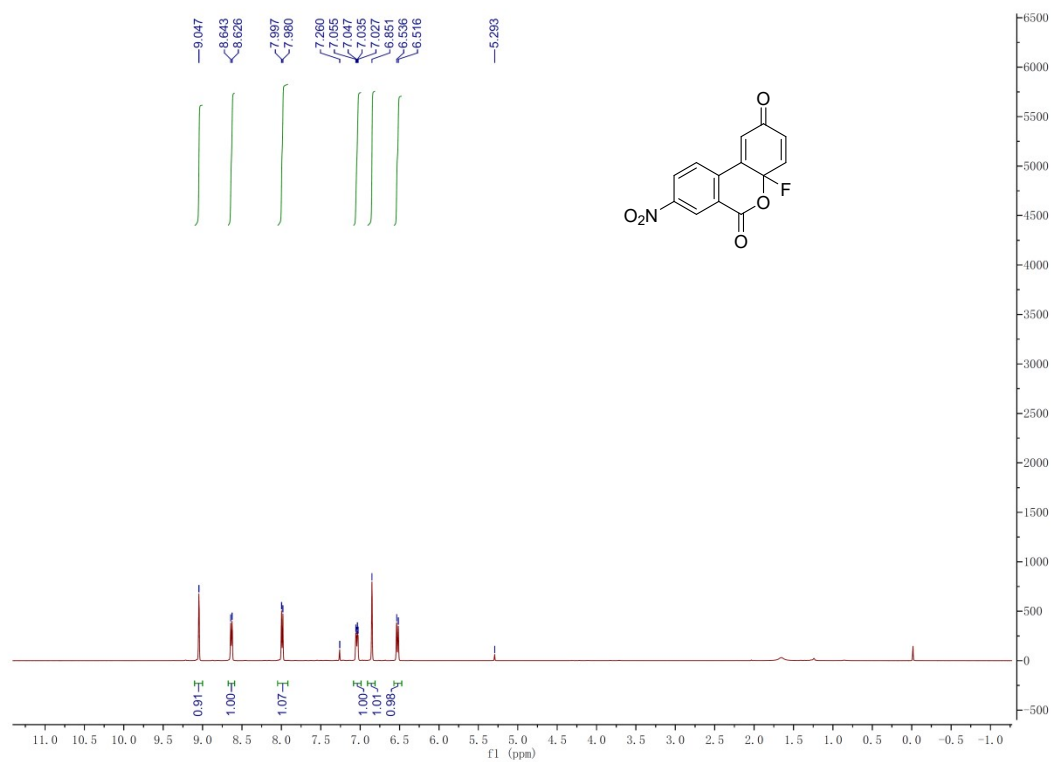

$^{13}\text{C}$  { $^1\text{H}$ } NMR (126 MHz,  $\text{CDCl}_3$ )

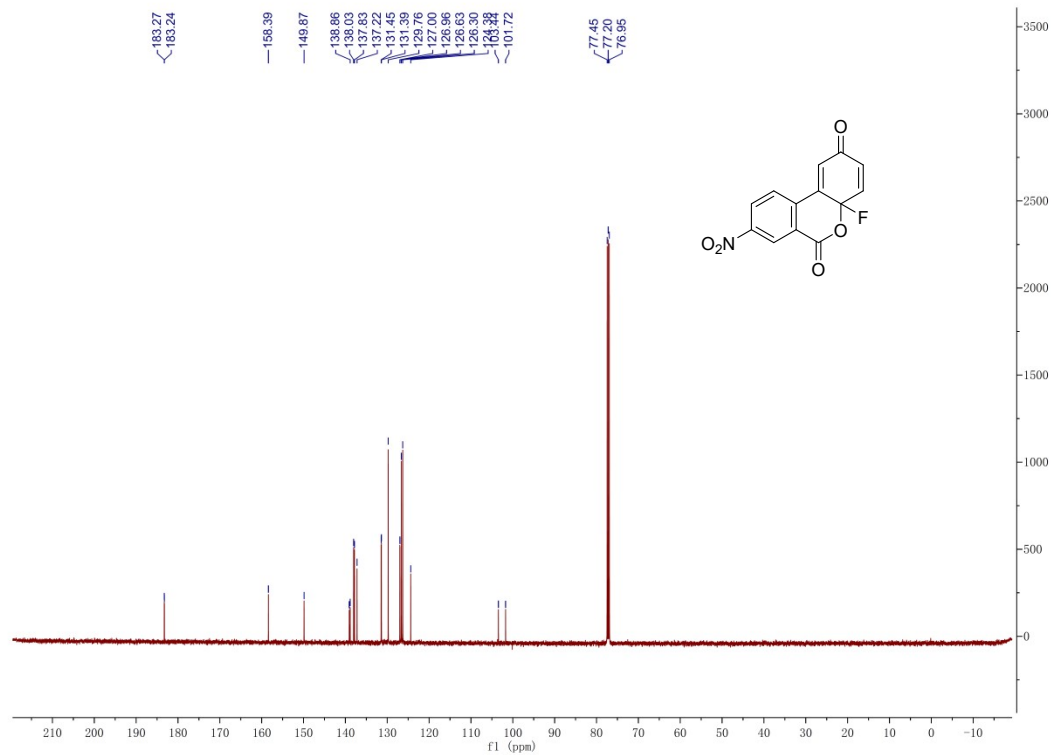

<sup>19</sup>F NMR(376 MHz, CDCl<sub>3</sub>)

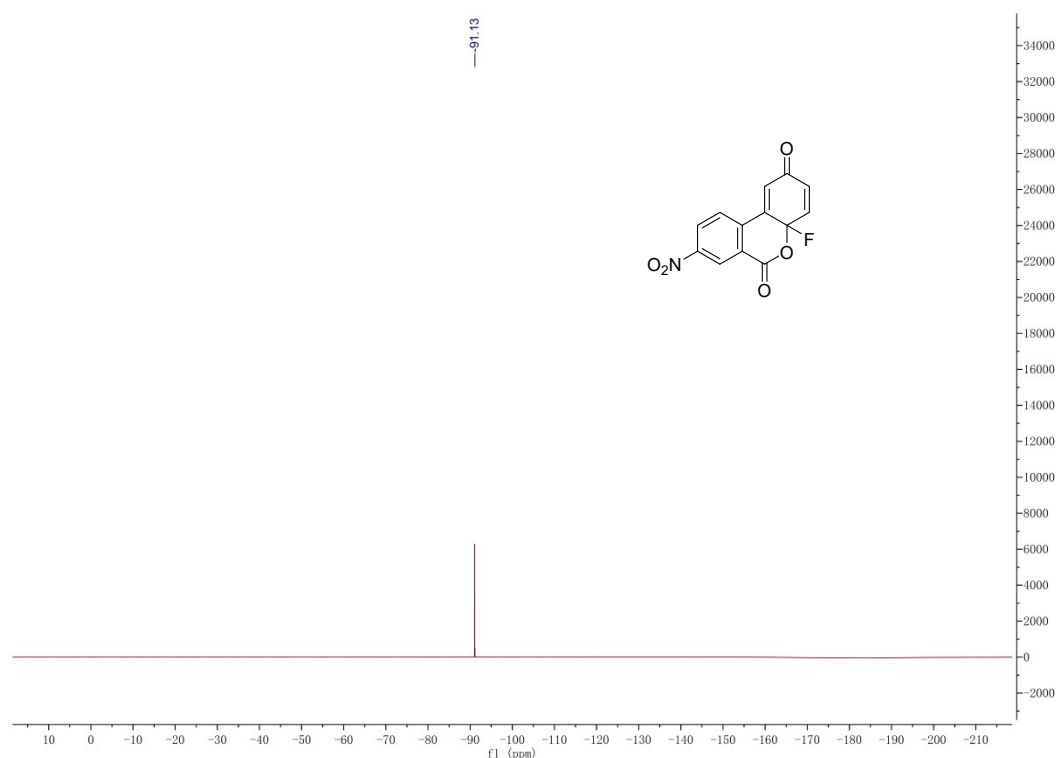

HRMS (ESI-TOF) m/z calcd for C<sub>13</sub>H<sub>6</sub>FNO<sub>5</sub> (M-H)<sup>-</sup> 274.0157, found 274.0152.

Acquisition Parameter

|                          |            |                   |     |                       |                          |
|--------------------------|------------|-------------------|-----|-----------------------|--------------------------|
| Polarity                 | Negative   | n/a               | n/a | No. of Laser Shots    | 200                      |
| n/a                      | n/a        | No. of Cell Fills | 1   | Laser Power           | 20.0 lp                  |
| Broadband Low Mass       | 200.7 m/z  | n/a               | n/a | n/a                   | n/a                      |
| Broadband High Mass      | 1000.0 m/z | n/a               | n/a | n/a                   | n/a                      |
| Acquisition Mode         | Single MS  | n/a               | n/a | Calibration Date      | Wed Jun 17 02:41:42      |
| Pulse Program            | basic      | n/a               | n/a | Data Acquisition Size | 2028576                  |
| Source Accumulation      | 0.500 sec  | n/a               | n/a | Apodization           | Sine-Bell Multiplication |
| Ion Accumulation Time    | 0.200 sec  | n/a               | n/a |                       |                          |
| Flight Time to Acq. Cell | 0.001 sec  | n/a               | n/a |                       |                          |

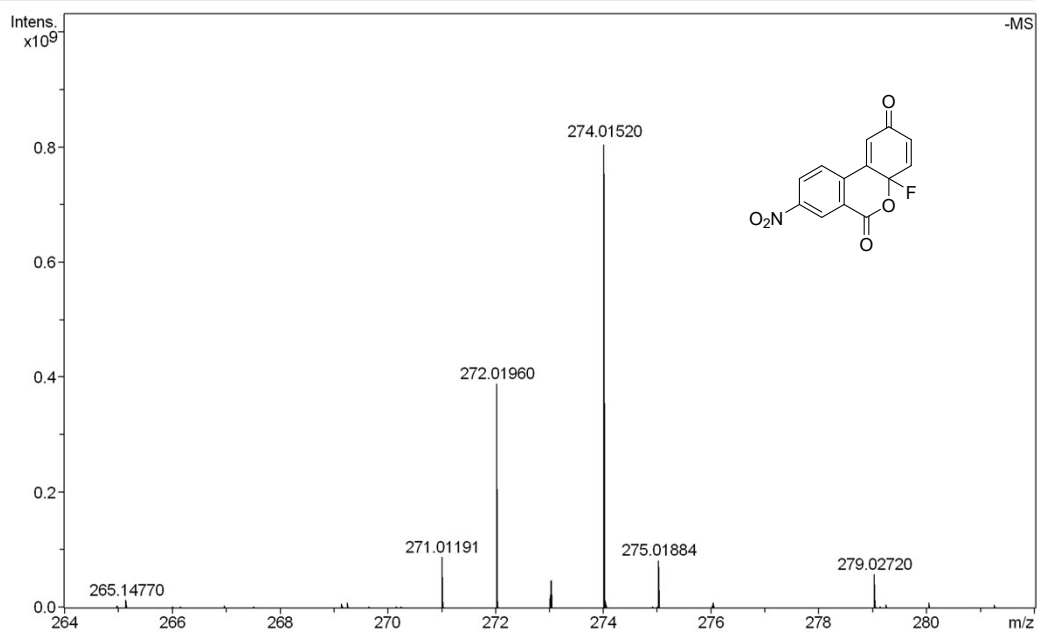

| Meas. m/z | # | Formula                                         | Score  | m/z       | err [ppm] | Mean err [ppm] | mSigma | rdb  | e <sup>-</sup> Conf | N-Rule |
|-----------|---|-------------------------------------------------|--------|-----------|-----------|----------------|--------|------|---------------------|--------|
| 274.01520 | 1 | C <sub>13</sub> H <sub>5</sub> FNO <sub>5</sub> | 100.00 | 274.01572 | 1.92      | 1.82           | 26.9   | 11.5 | even                | ok     |

### 4a,8-difluoro-6H-benzo[c]chromene-2,6(4aH)-dione (**2f**)

<sup>1</sup>H NMR (500 MHz, CDCl<sub>3</sub>)

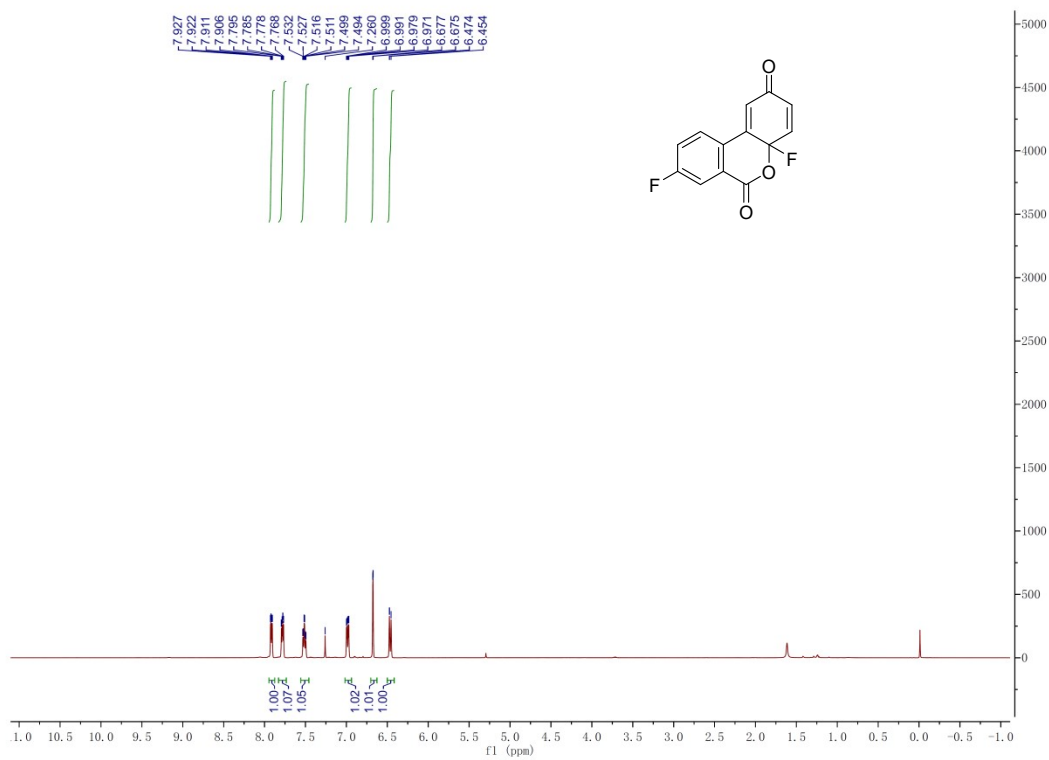

<sup>13</sup>C {<sup>1</sup>H} NMR (126 MHz, CDCl<sub>3</sub>)

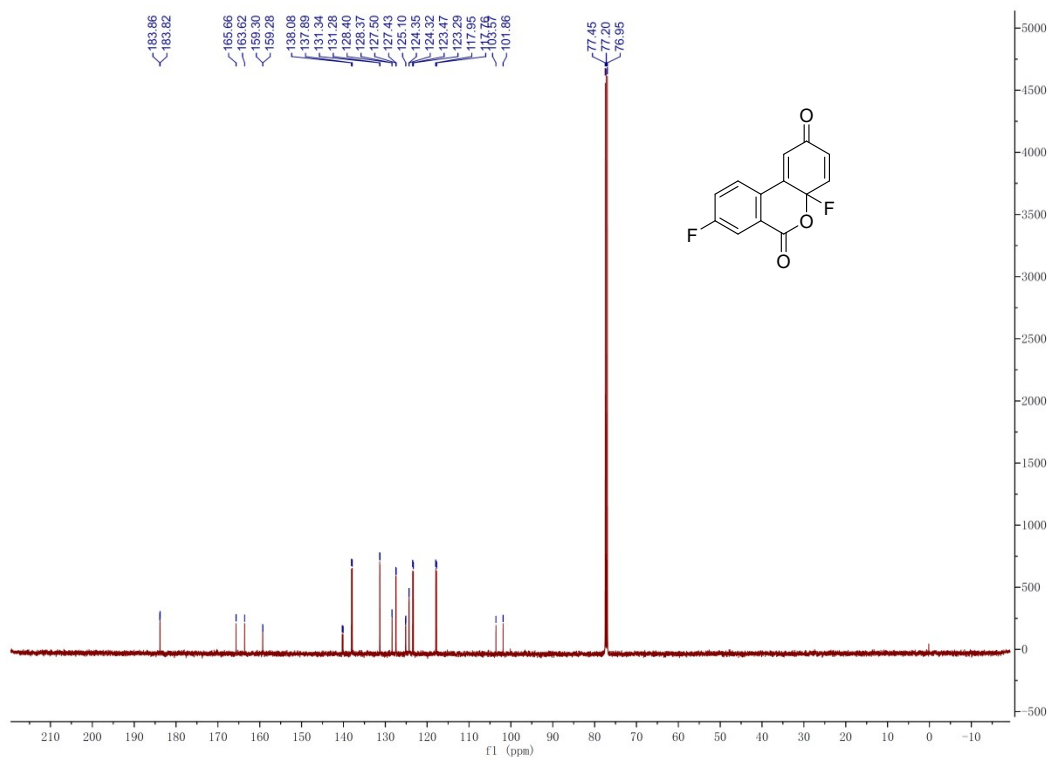

<sup>19</sup>F NMR (376 MHz, CDCl<sub>3</sub>)

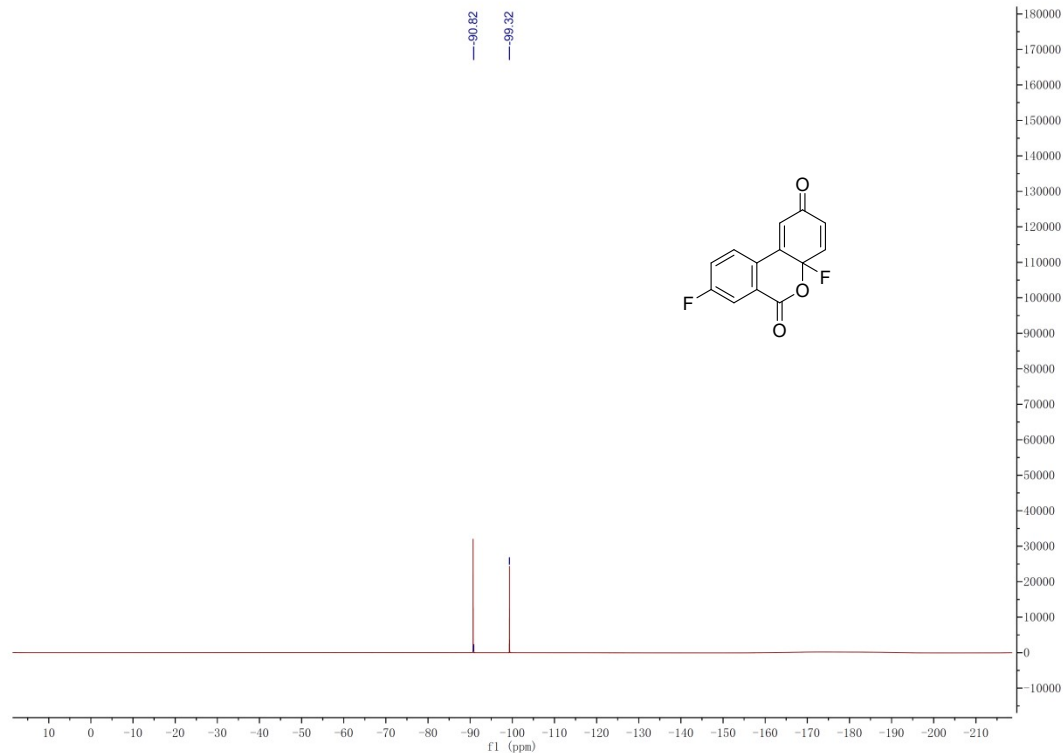

HRMS (ESI-TOF)  $m/z$  calcd for  $C_{13}H_6F_2O_3$  (M-H)<sup>-</sup> 247.0212, found 247.0213.

**Acquisition Parameter**

|                          |            |                   |     |                       |                          |
|--------------------------|------------|-------------------|-----|-----------------------|--------------------------|
| Polarity                 | Negative   | n/a               | n/a | No. of Laser Shots    | 200                      |
| n/a                      | n/a        | No. of Cell Fills | 1   | Laser Power           | 20.0 lp                  |
| Broadband Low Mass       | 200.7 m/z  | n/a               | n/a | n/a                   | n/a                      |
| Broadband High Mass      | 1000.0 m/z | n/a               | n/a | n/a                   | n/a                      |
| Acquisition Mode         | Single MS  | n/a               | n/a | Calibration Date      | Wed Jun 17 02:41:42      |
| Pulse Program            | basic      | n/a               | n/a | Data Acquisition Size | 2020576                  |
| Source Accumulation      | 0.500 sec  | n/a               | n/a | Apodization           | Sine-Bell Multiplication |
| Ion Accumulation Time    | 0.100 sec  | n/a               | n/a |                       |                          |
| Flight Time to Acq. Cell | 0.001 sec  |                   |     |                       |                          |

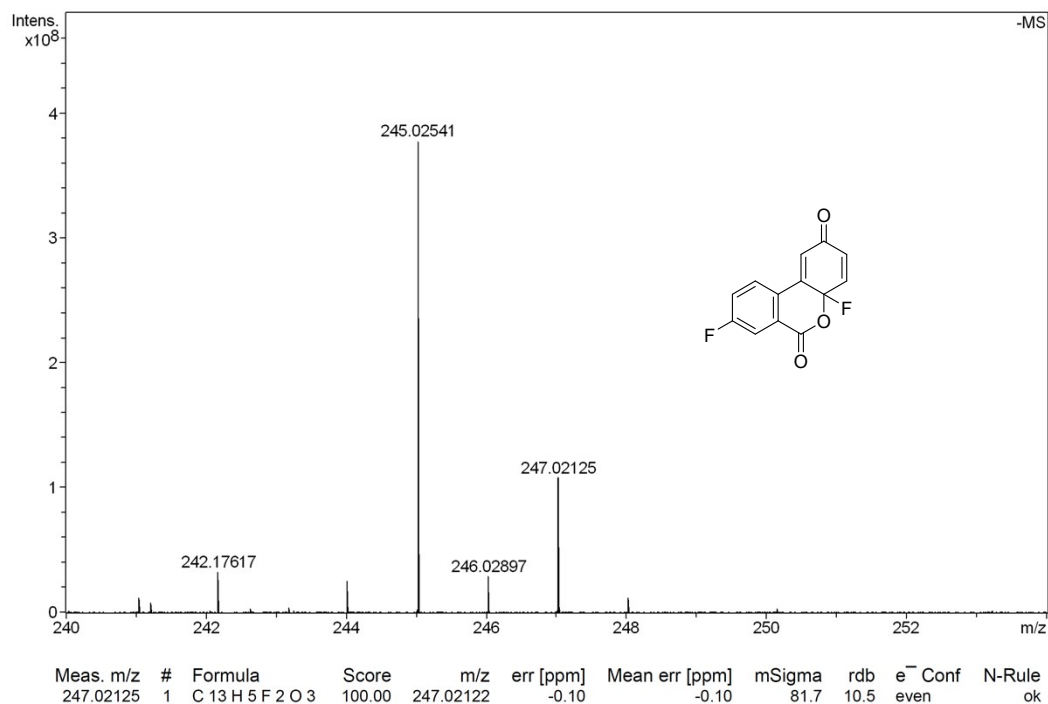

4a-fluoro-8-methoxy-6H-benzo[c]chromene-2,6(4aH)-dione (**2g**)

<sup>1</sup>H NMR (500 MHz, CDCl<sub>3</sub>)

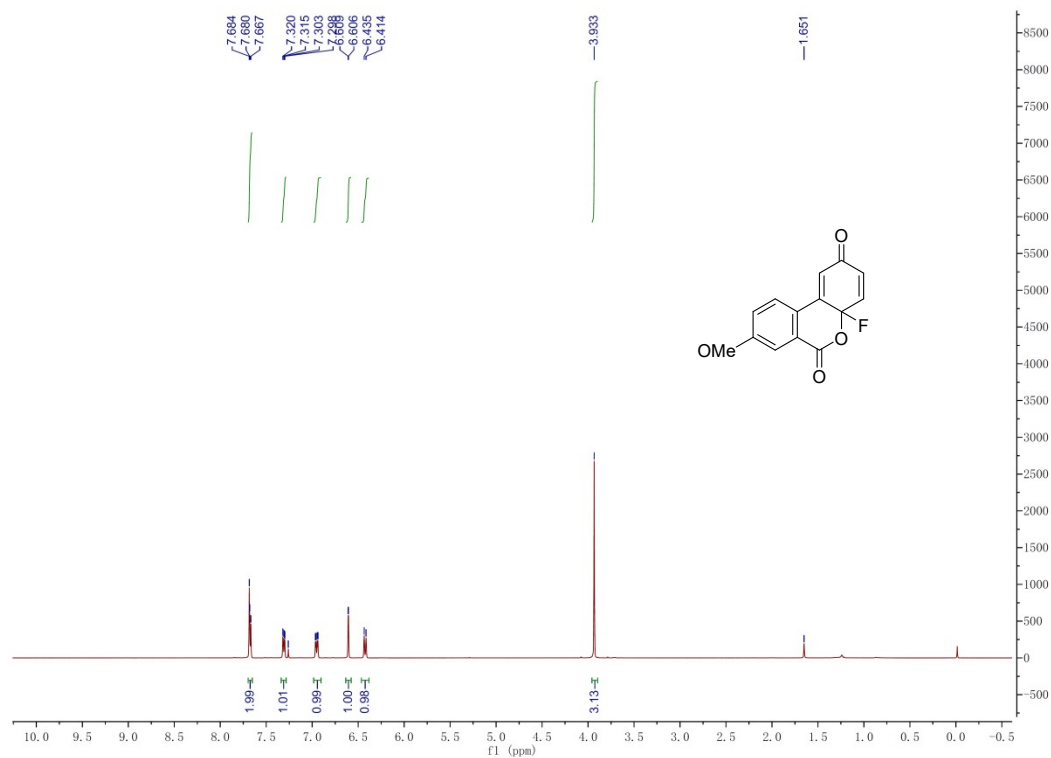

<sup>13</sup>C {<sup>1</sup>H} NMR (126 MHz, CDCl<sub>3</sub>)

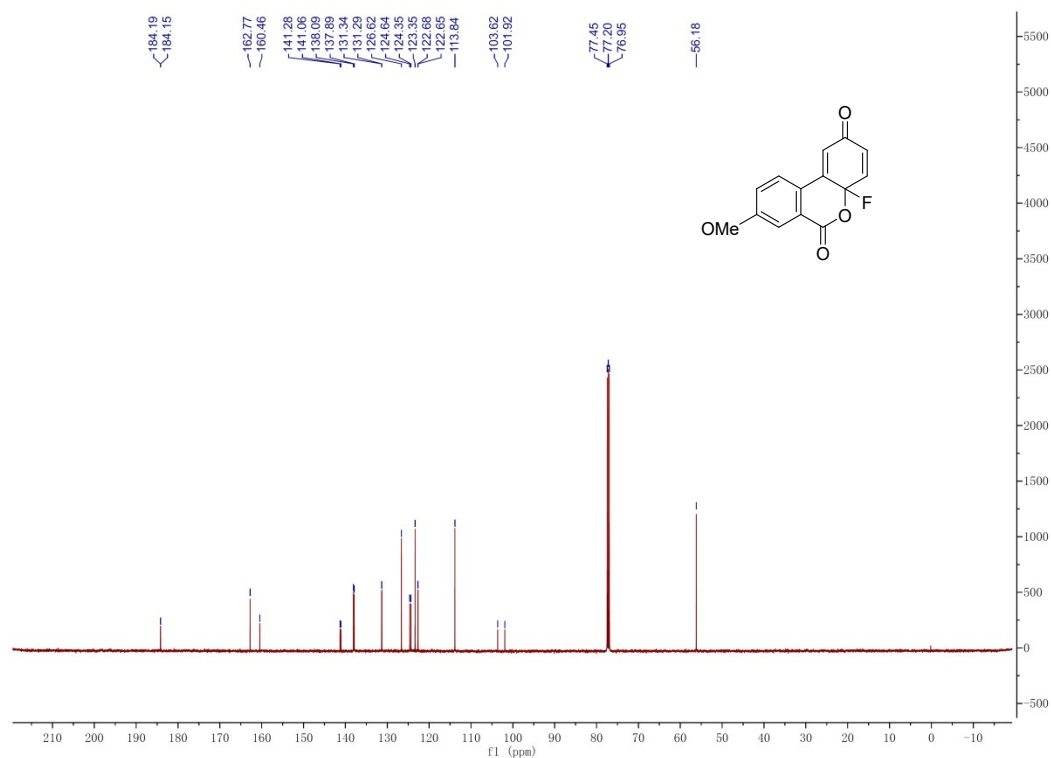

<sup>19</sup>F NMR (376 MHz, CDCl<sub>3</sub>)

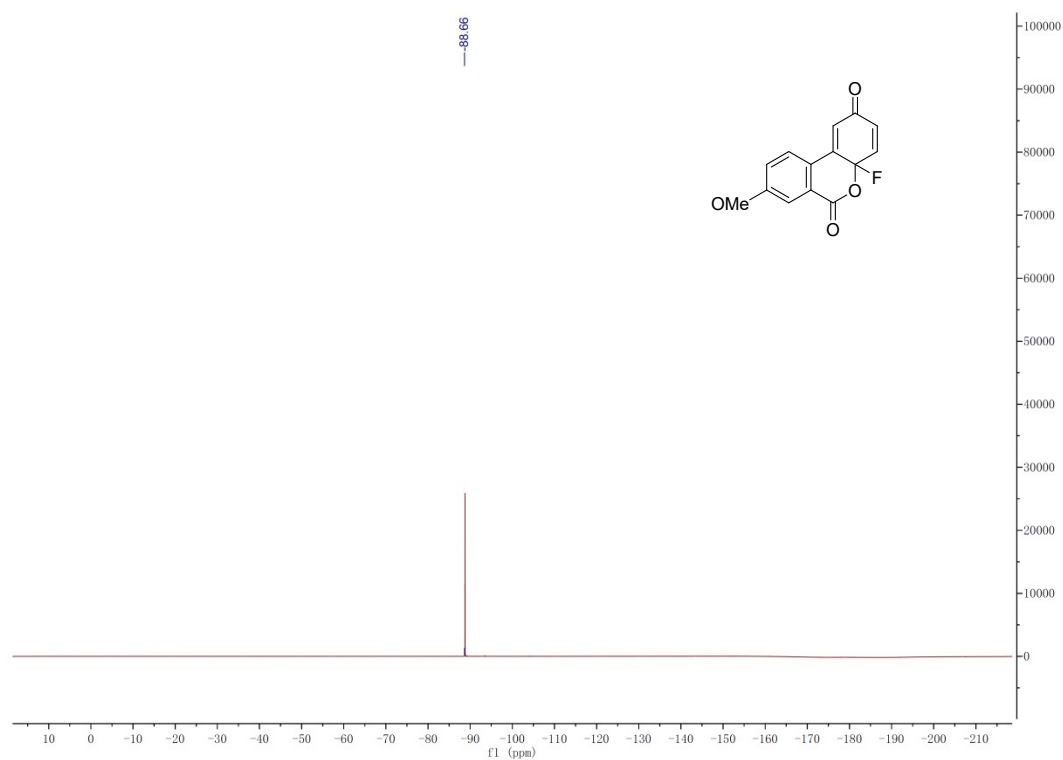

HRMS (ESI-TOF)  $m/z$  calcd for  $C_{14}H_9FO_4$  (M-H)<sup>-</sup> 259.0412, found 259.0411.

**Acquisition Parameter**

|                          |            |                   |     |                       |                          |
|--------------------------|------------|-------------------|-----|-----------------------|--------------------------|
| Polarity                 | Negative   | n/a               | n/a | No. of Laser Shots    | 200                      |
| n/a                      | n/a        | No. of Cell Fills | 1   | Laser Power           | 20.0 lp                  |
| Broadband Low Mass       | 200.7 m/z  | n/a               | n/a | n/a                   | n/a                      |
| Broadband High Mass      | 1000.0 m/z | n/a               | n/a | n/a                   | n/a                      |
| Acquisition Mode         | Single MS  | n/a               | n/a | Calibration Date      | Wed Jun 17 02:41:42      |
| Pulse Program            | basic      | n/a               | n/a | Data Acquisition Size | 2029576                  |
| Source Accumulation      | 0.500 sec  | n/a               | n/a | Apodization           | Sine-Bell Multiplication |
| Ion Accumulation Time    | 0.200 sec  | n/a               | n/a |                       |                          |
| Flight Time to Acq. Cell | 0.001 sec  |                   |     |                       |                          |

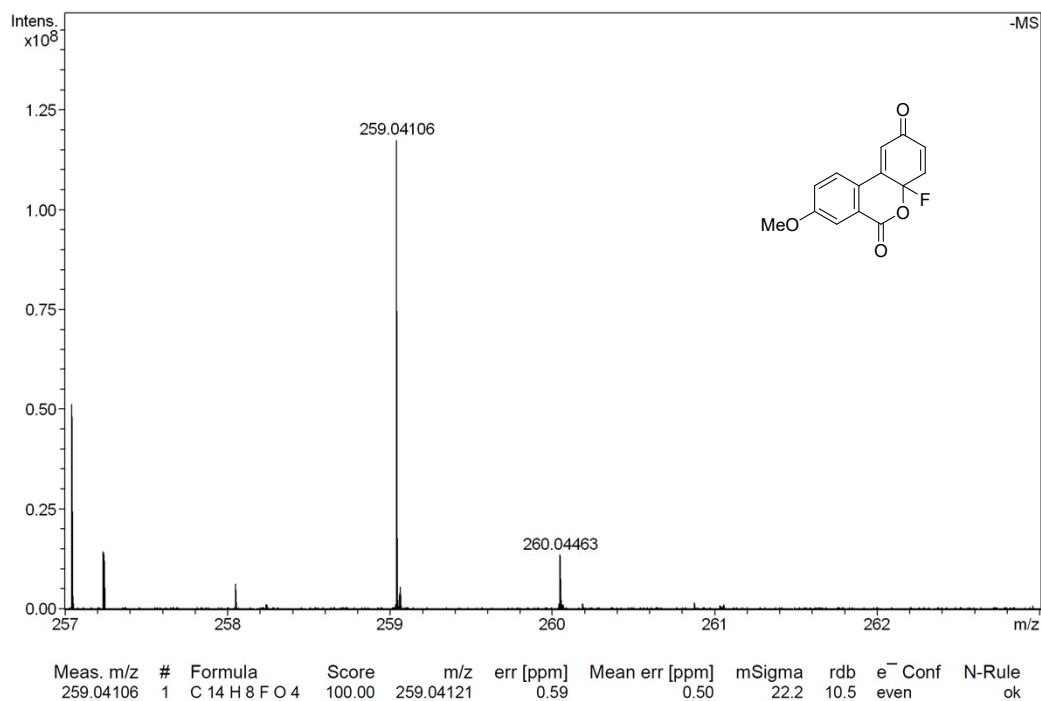

7-chloro-4a-fluoro-6H-benzo[c]chromene-2,6(4aH)-dione (**2h**)

$^1\text{H}$  NMR (500 MHz,  $\text{CDCl}_3$ )

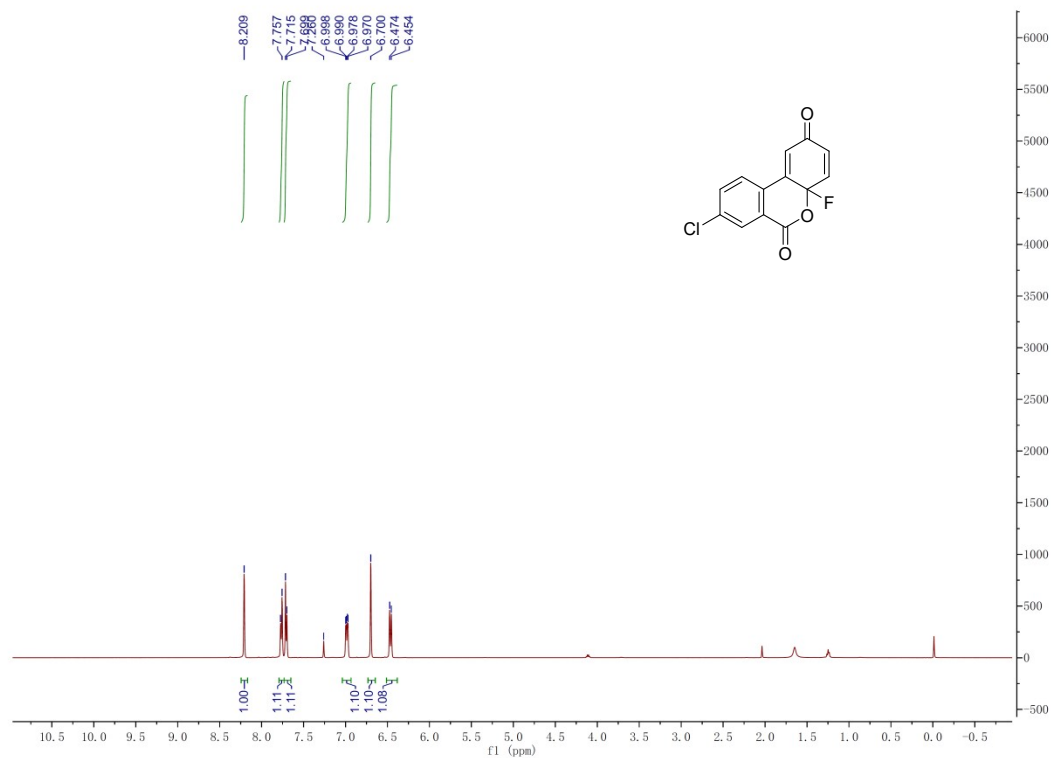

$^{13}\text{C}$  { $^1\text{H}$ } NMR (126 MHz,  $\text{CDCl}_3$ )

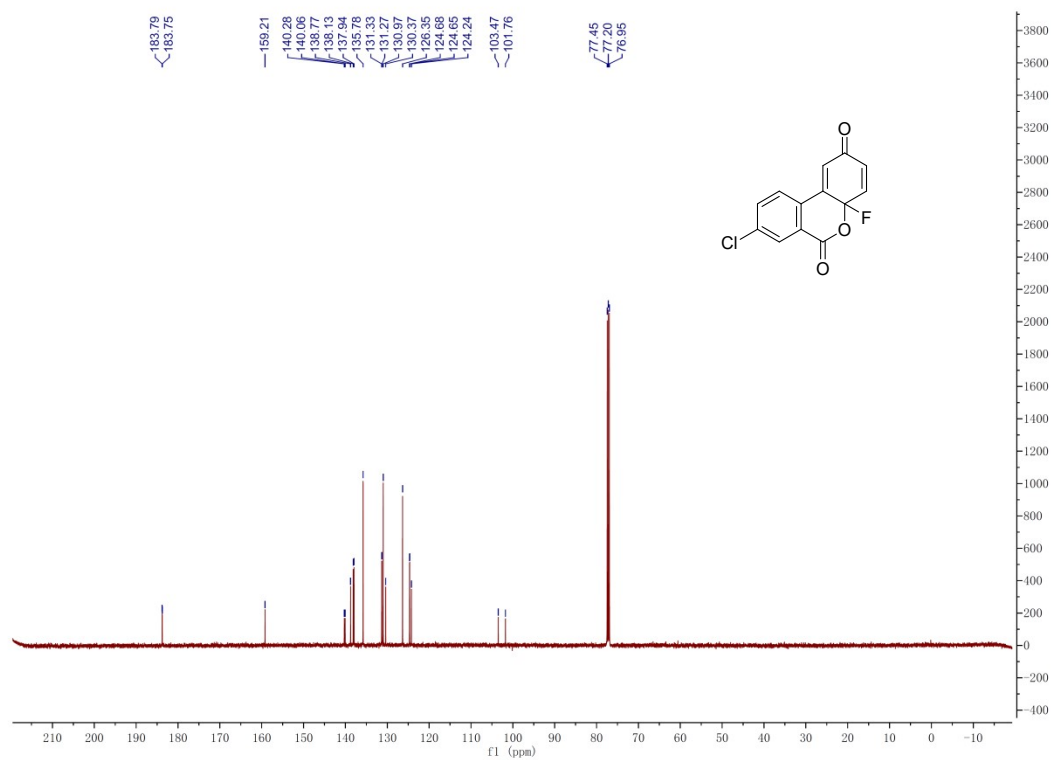

$^{19}\text{F}$  NMR (376 MHz,  $\text{CDCl}_3$ )



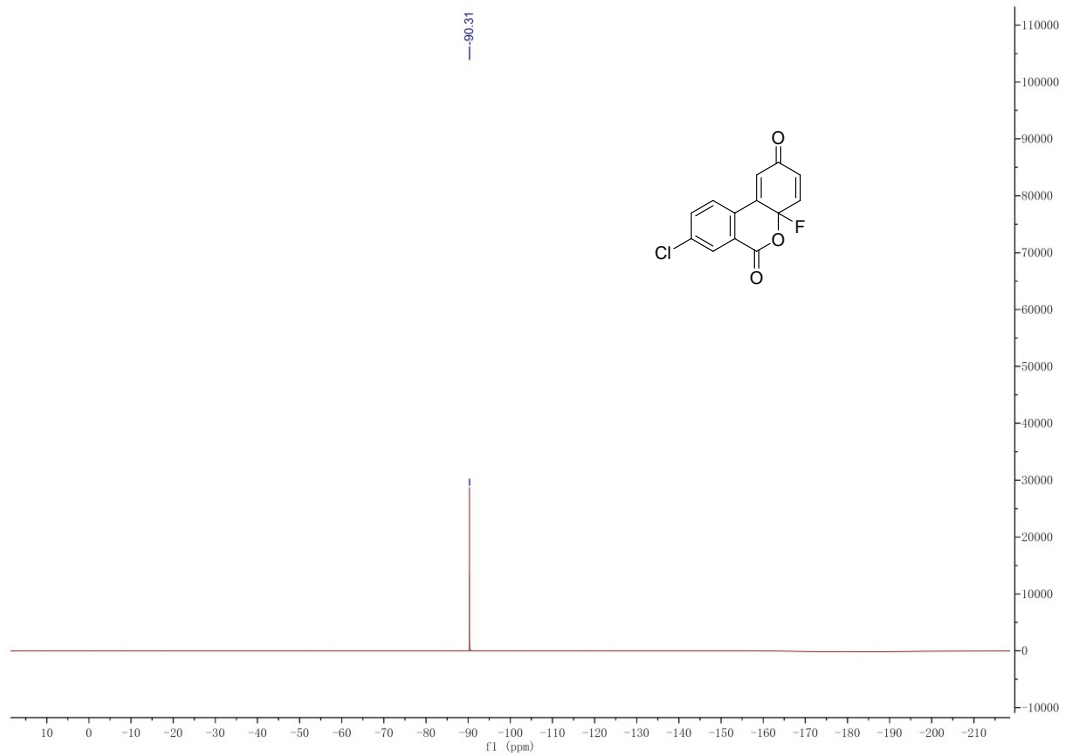

HRMS (ESI-TOF)  $m/z$  calcd for  $C_{13}H_6ClFO_3$  (M-H)<sup>-</sup> 262.9917, found 262.9920.

**Acquisition Parameter**

|                          |            |                   |     |                       |                          |
|--------------------------|------------|-------------------|-----|-----------------------|--------------------------|
| Polarity                 | Negative   | n/a               | n/a | No. of Laser Shots    | 200                      |
| n/a                      | n/a        | No. of Cell Fills | 1   | Laser Power           | 20.0 lp                  |
| Broadband Low Mass       | 100.4 m/z  | n/a               | n/a | n/a                   | n/a                      |
| Broadband High Mass      | 1000.0 m/z | n/a               | n/a | n/a                   | n/a                      |
| Acquisition Mode         | Single MS  | n/a               | n/a | Calibration Date      | Wed Jun 17 02:41:42      |
| Pulse Program            | basic      | n/a               | n/a | Data Acquisition Size | 2020576                  |
| Source Accumulation      | 0.500 sec  | n/a               | n/a | Apodization           | Sine-Bell Multiplication |
| Ion Accumulation Time    | 0.200 sec  | n/a               | n/a |                       |                          |
| Flight Time to Acq. Cell | 0.001 sec  | n/a               | n/a |                       |                          |

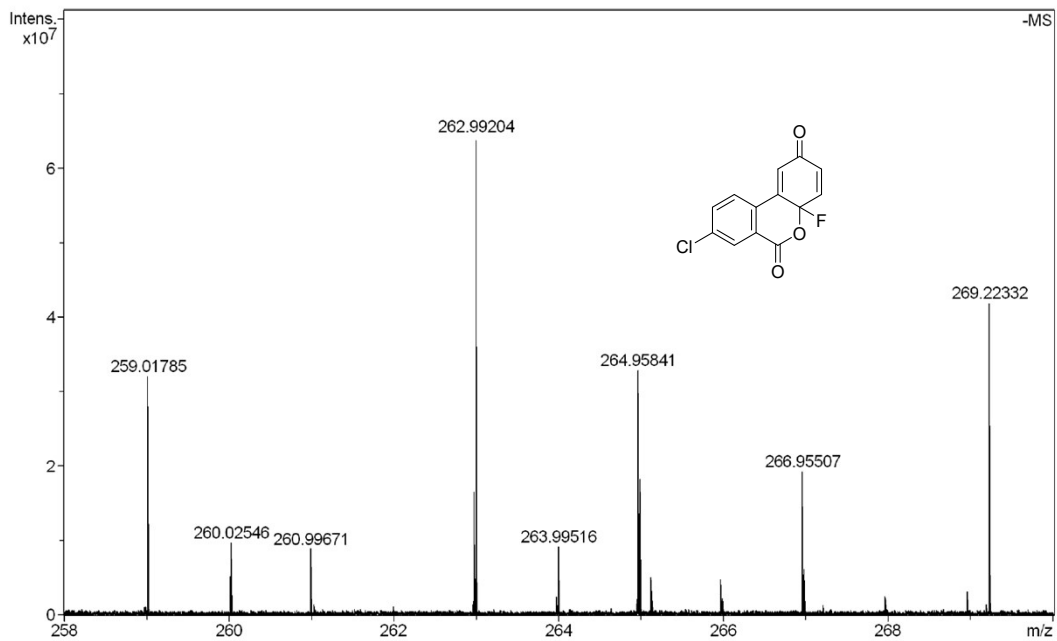

| Meas. $m/z$ | # | Formula                                          | Score  | $m/z$     | err [ppm] | Mean err [ppm] | mSigma | rdb  | e <sup>-</sup> Conf | N-R ulation |
|-------------|---|--------------------------------------------------|--------|-----------|-----------|----------------|--------|------|---------------------|-------------|
| 262.99204   | 1 | C <sub>13</sub> H <sub>5</sub> ClFO <sub>3</sub> | 100.00 | 262.99167 | -1.39     | -1.28          | 169.0  | 10.5 | even                | ok          |

7-chloro-4a-fluoro-6H-benzo[*c*]chromene-2,6(4a*H*)-dione (**2i**)

$^1\text{H}$  NMR (500 MHz,  $\text{CDCl}_3$ )

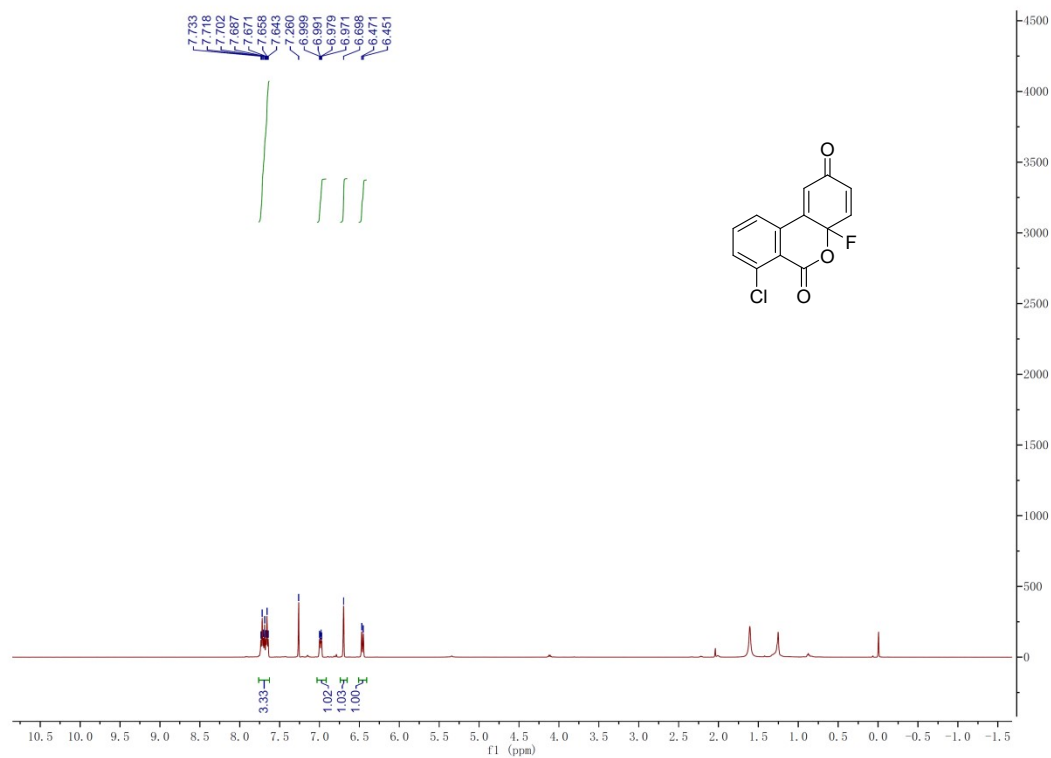

$^{13}\text{C}$  { $^1\text{H}$ } NMR (126 MHz,  $\text{CDCl}_3$ )

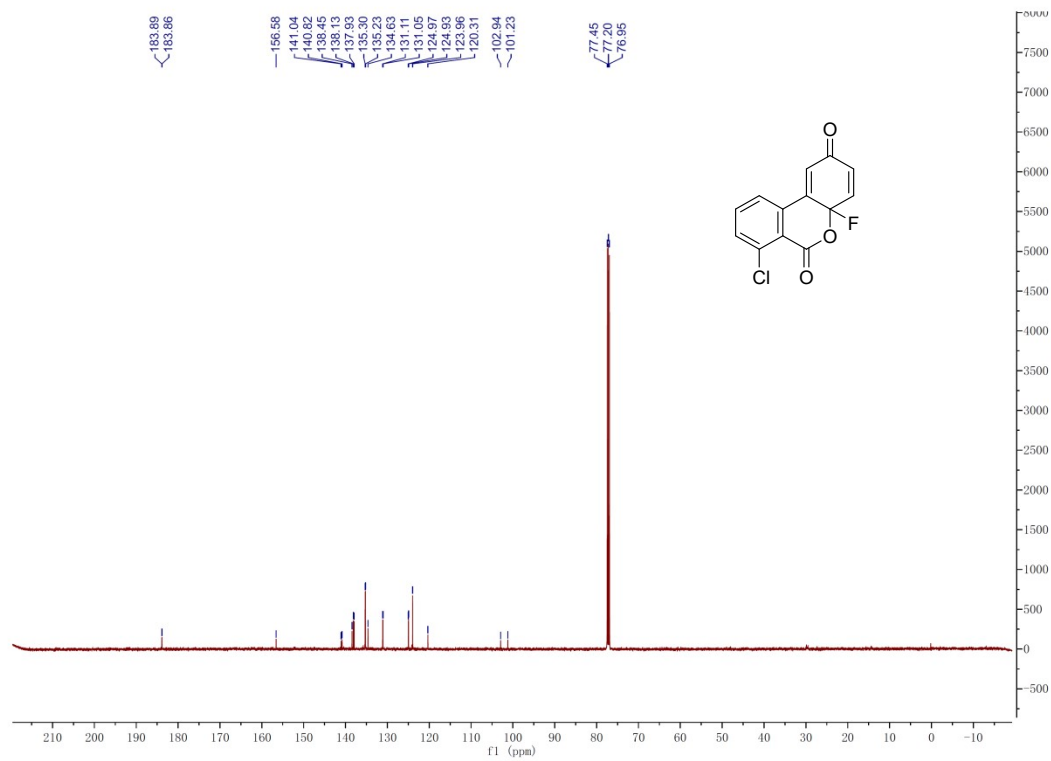

$^{19}\text{F}$  NMR(376 MHz,  $\text{CDCl}_3$ )

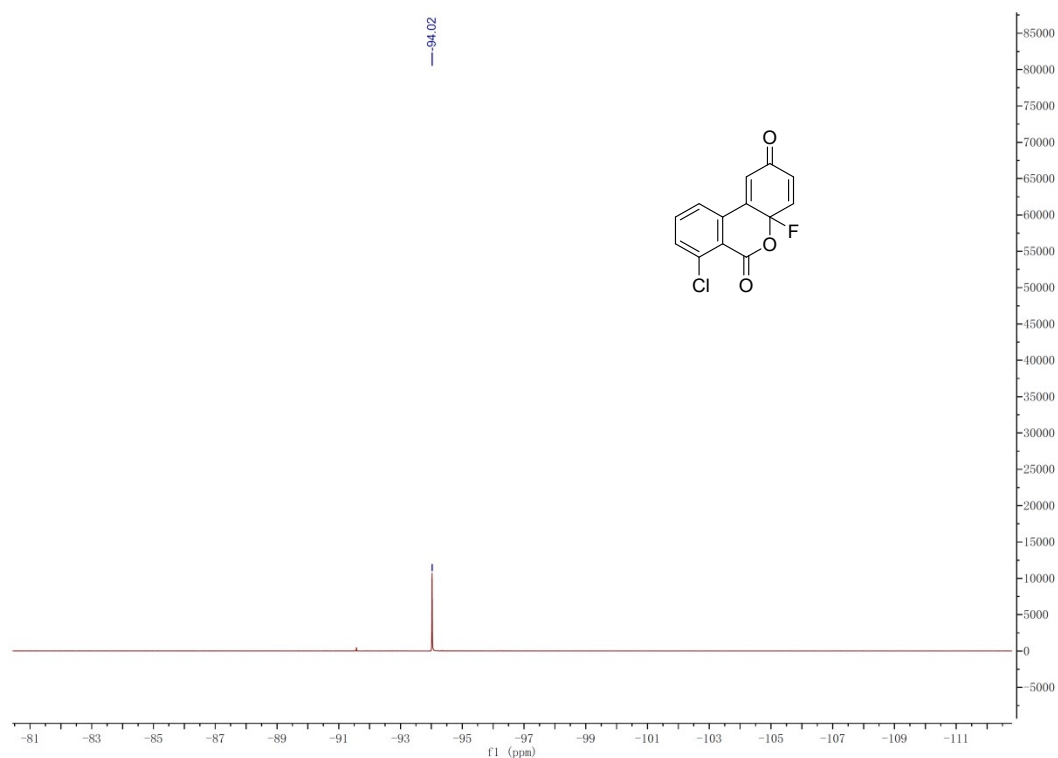

HRMS (ESI-TOF)  $m/z$  calcd for  $\text{C}_{13}\text{H}_6\text{ClFO}_3$  (M-H) $^-$  262.9917, found 262.9913.

Acquisition Parameter

|                          |            |                   |     |                       |                          |
|--------------------------|------------|-------------------|-----|-----------------------|--------------------------|
| Polarity                 | Negative   | n/a               | n/a | No. of Laser Shots    | 200                      |
| n/a                      | n/a        | No. of Cell Fills | 1   | Laser Power           | 20.0 lp                  |
| Broadband Low Mass       | 200.7 m/z  | n/a               | n/a | n/a                   | n/a                      |
| Broadband High Mass      | 1000.0 m/z | n/a               | n/a | n/a                   | n/a                      |
| Acquisition Mode         | Single MS  | n/a               | n/a | Calibration Date      | Wed Jun 17 02:41:42      |
| Pulse Program            | basic      | n/a               | n/a | Data Acquisition Size | 2020576                  |
| Source Accumulation      | 0.500 sec  | n/a               | n/a | Apodization           | Sine-Bell Multiplication |
| Ion Accumulation Time    | 0.200 sec  | n/a               | n/a |                       |                          |
| Flight Time to Acq. Cell | 0.001 sec  |                   |     |                       |                          |

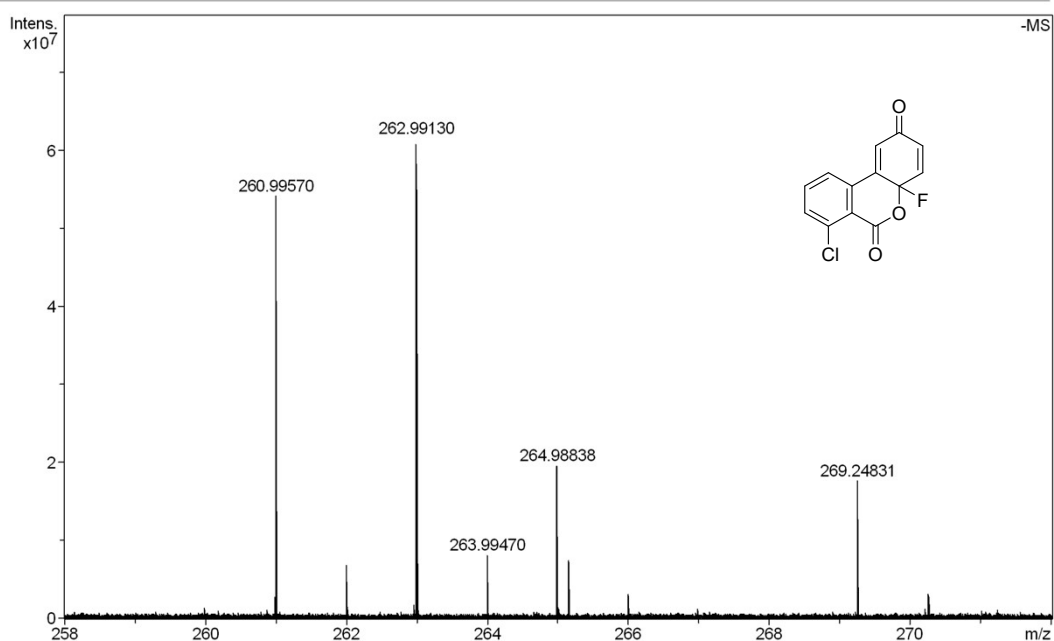

| Meas. $m/z$ | # | Formula                                | Score  | $m/z$     | err [ppm] | Mean err [ppm] | mSig | rdb  | $e^-$ Conf | N-R rule |
|-------------|---|----------------------------------------|--------|-----------|-----------|----------------|------|------|------------|----------|
| 262.99130   | 1 | $\text{C}_{13}\text{H}_5\text{ClFO}_3$ | 100.00 | 262.99167 | 1.42      | 1.45           | 24.2 | 10.5 | even       | ok       |

4a,9-difluoro-6H-benzo[c]chromene-2,6(4aH)-dione (**2j**)

$^1\text{H}$  NMR (500 MHz,  $\text{CDCl}_3$ )

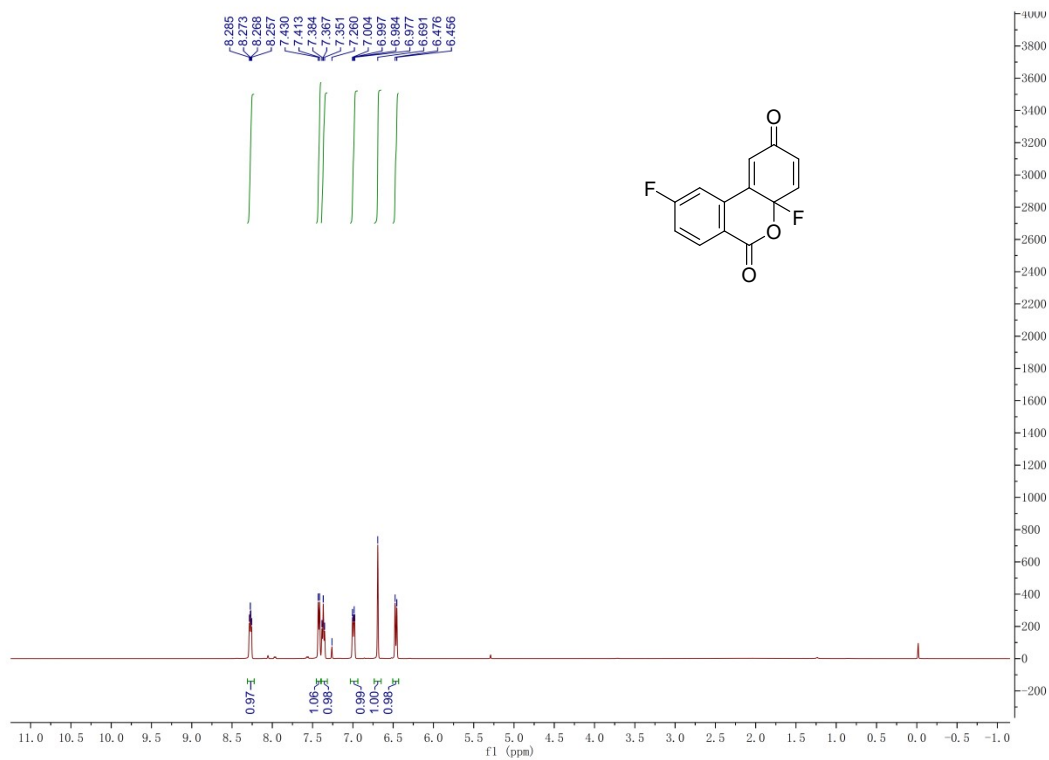

$^{13}\text{C}$  { $^1\text{H}$ } NMR (126 MHz,  $\text{CDCl}_3$ )

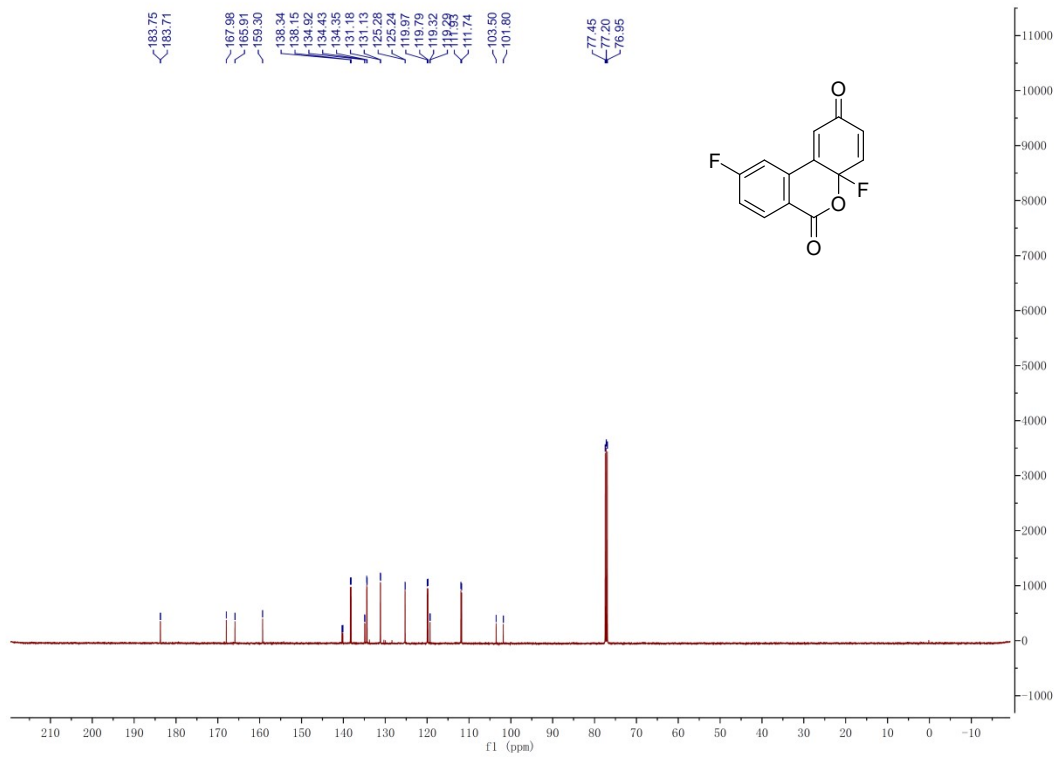

$^{19}\text{F}$  NMR(376 MHz,  $\text{CDCl}_3$ )

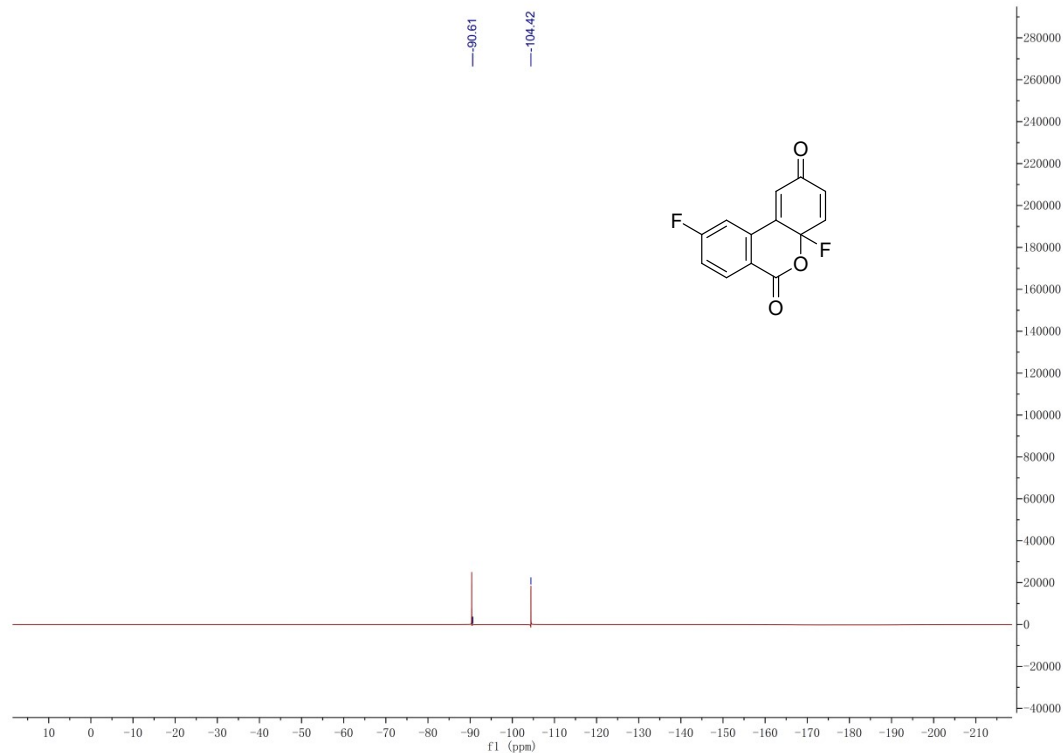

HRMS (ESI-TOF)  $m/z$  calcd for  $C_{13}H_6F_2O_3$  (M-H)<sup>-</sup> 247.0212, found 247.0211.

**Acquisition Parameter**

|                          |            |                   |     |                       |                          |
|--------------------------|------------|-------------------|-----|-----------------------|--------------------------|
| Polarity                 | Negative   | n/a               | n/a | No. of Laser Shots    | 200                      |
| n/a                      | n/a        | No. of Cell Fills | 1   | Laser Power           | 20.0 lp                  |
| Broadband Low Mass       | 200.7 m/z  | n/a               | n/a | n/a                   | n/a                      |
| Broadband High Mass      | 1000.0 m/z | n/a               | n/a | n/a                   | n/a                      |
| Acquisition Mode         | Single MS  | n/a               | n/a | Calibration Date      | Wed Jun 17 02:41:42      |
| Pulse Program            | basic      | n/a               | n/a | Data Acquisition Size | 2028576                  |
| Source Accumulation      | 0.500 sec  | n/a               | n/a | Apodization           | Sine-Bell Multiplication |
| Ion Accumulation Time    | 0.200 sec  | n/a               | n/a |                       |                          |
| Flight Time to Acq. Cell | 0.001 sec  |                   |     |                       |                          |

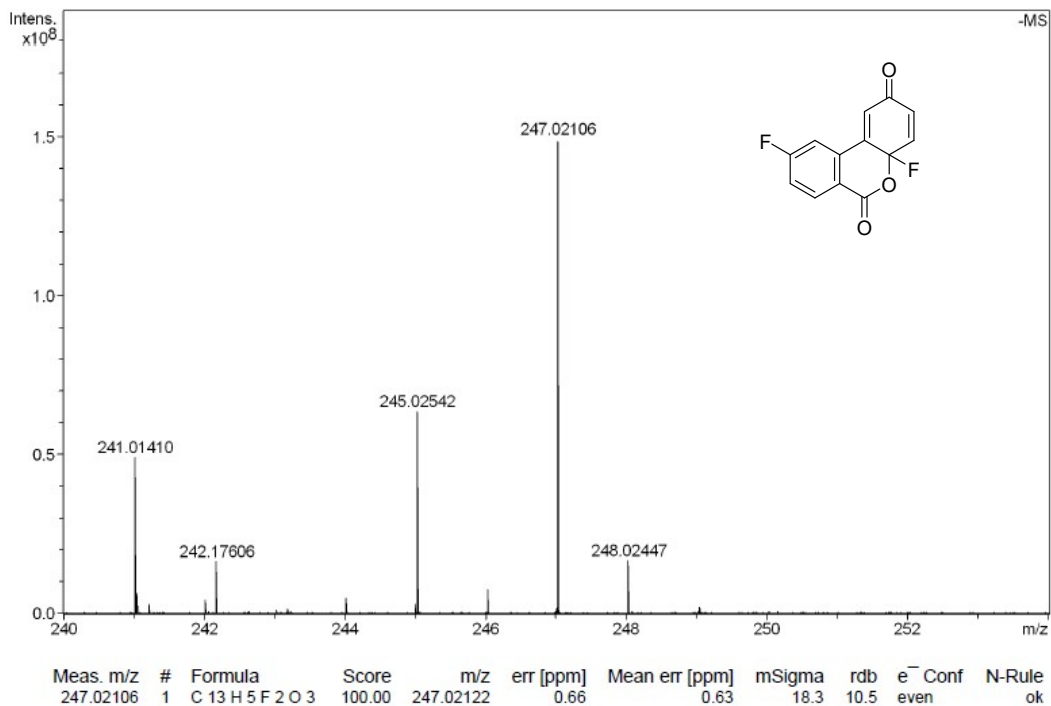

4a-fluoro-9-nitro-6H-benzo[c]chromene-2,6(4aH)-dione (**2k**)

$^1\text{H}$  NMR (500 MHz,  $\text{CDCl}_3$ )

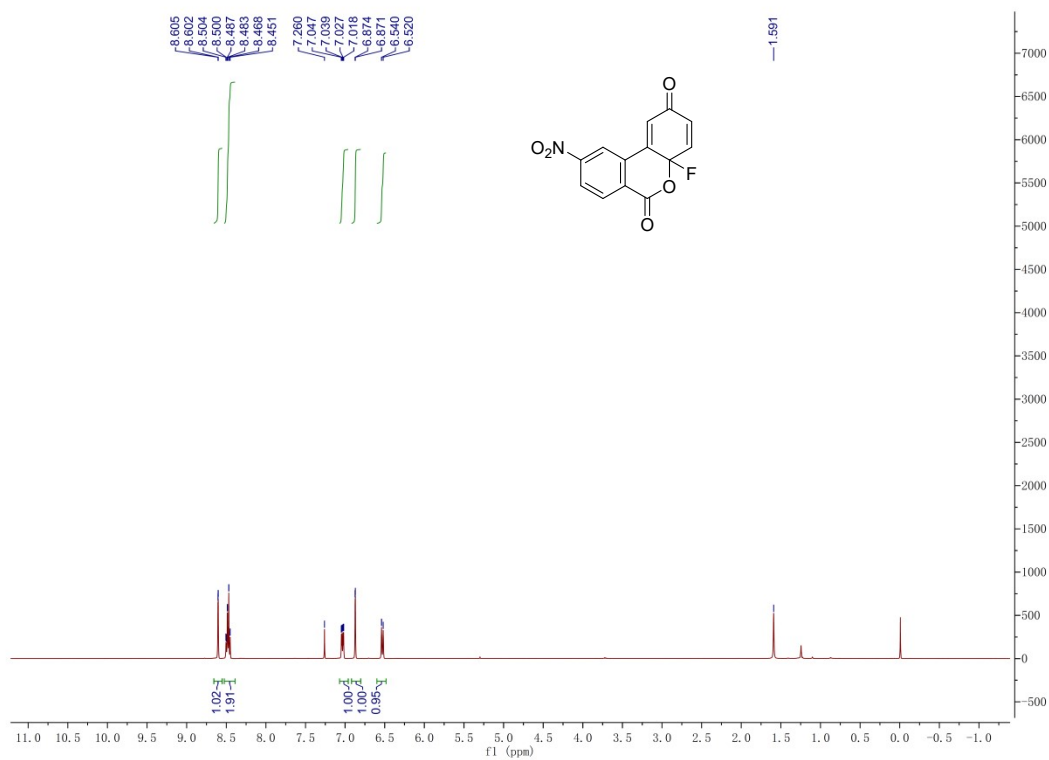

$^{13}\text{C}$  { $^1\text{H}$ } NMR (126 MHz,  $\text{CDCl}_3$ )

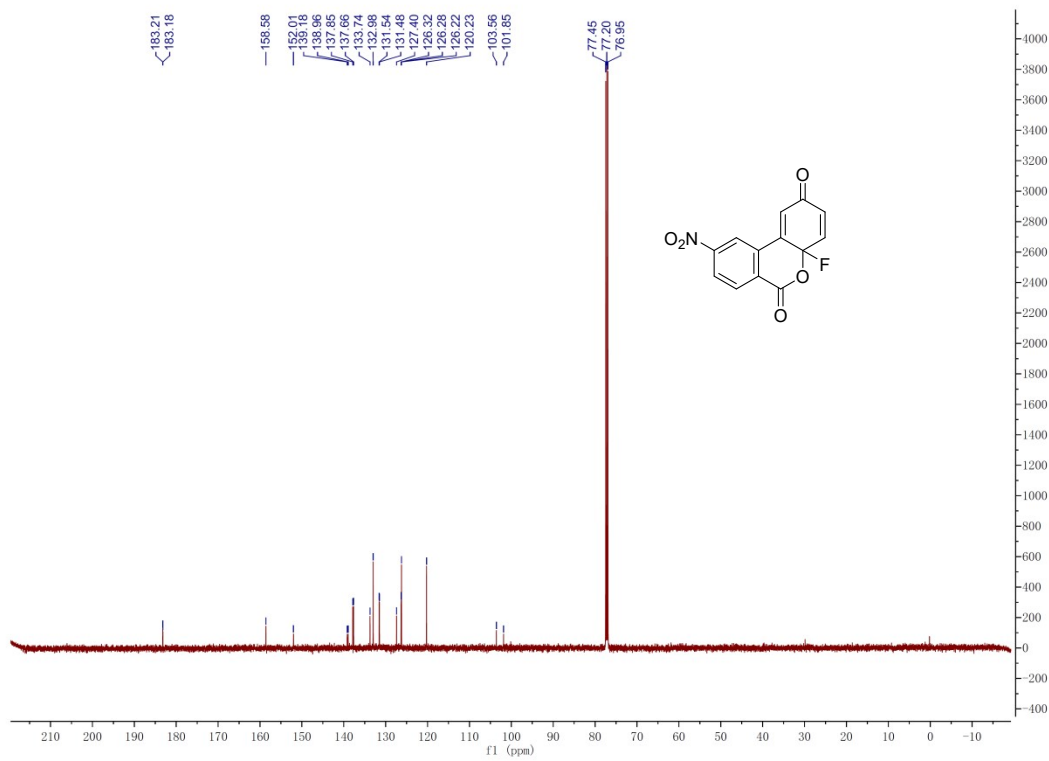

<sup>19</sup>F NMR(376 MHz, CDCl<sub>3</sub>)

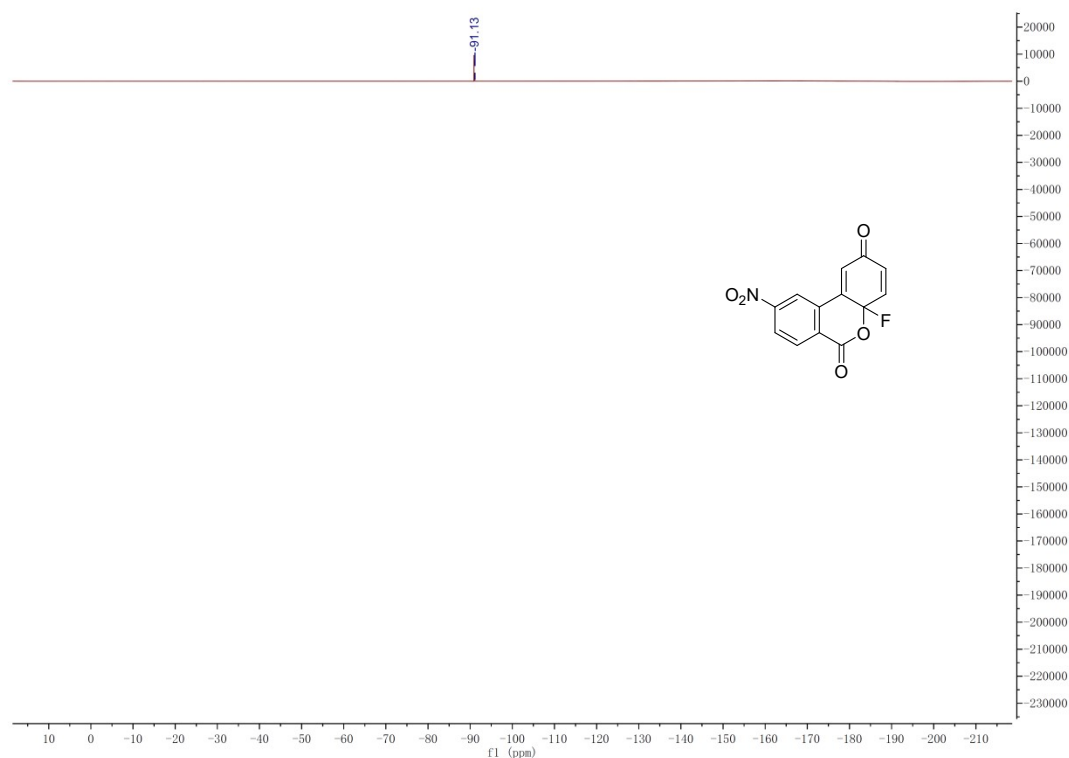

HRMS (ESI-TOF) m/z calcd for C<sub>13</sub>H<sub>6</sub>FNO<sub>5</sub> (M-H)<sup>-</sup> 274.0157, found 274.0155.

Acquisition Parameter

|                          |            |                   |     |                       |                          |
|--------------------------|------------|-------------------|-----|-----------------------|--------------------------|
| Polarity                 | Negative   | n/a               | n/a | No. of Laser Shots    | 200                      |
| n/a                      | n/a        | No. of Cell Fills | 1   | Laser Power           | 20.0 lp                  |
| Broadband Low Mass       | 200.7 m/z  | n/a               | n/a | n/a                   | n/a                      |
| Broadband High Mass      | 1000.0 m/z | n/a               | n/a | n/a                   | n/a                      |
| Acquisition Mode         | Single MS  | n/a               | n/a | Calibration Date      | Wed Jun 17 02:41:42      |
| Pulse Program            | basic      | n/a               | n/a | Data Acquisition Size | 2026576                  |
| Source Accumulation      | 0.500 sec  | n/a               | n/a | Apodization           | Sine-Bell Multiplication |
| Ion Accumulation Time    | 0.200 sec  | n/a               | n/a |                       |                          |
| Flight Time to Acq. Cell | 0.001 sec  | n/a               | n/a |                       |                          |

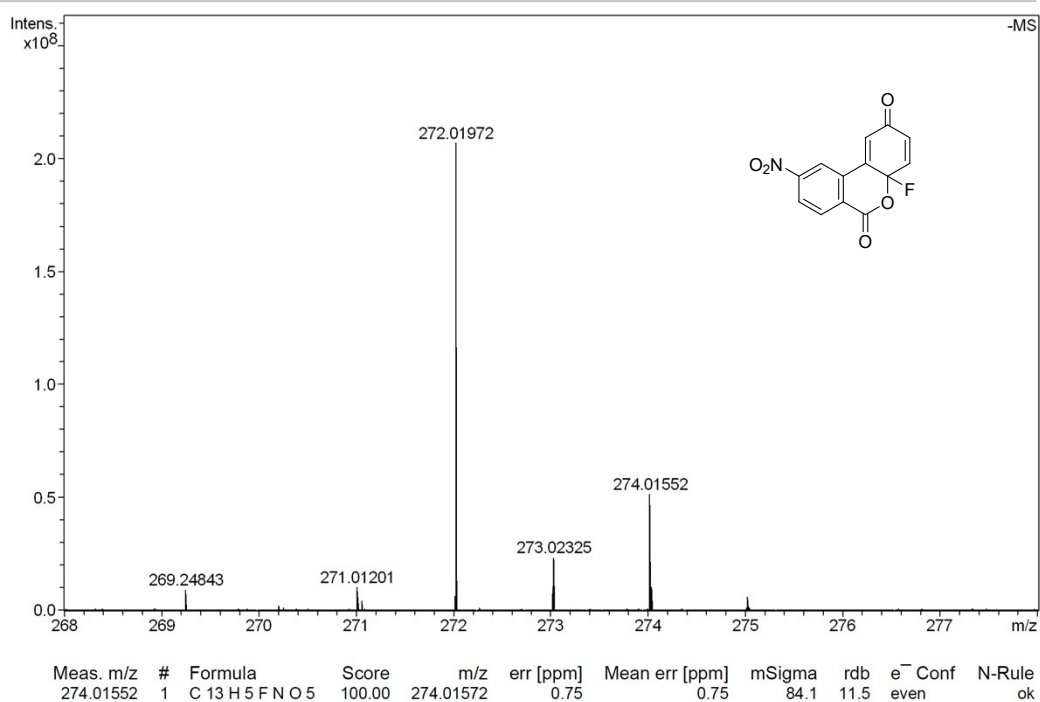

| Meas. m/z | # | Formula                                         | Score  | m/z       | err [ppm] | Mean err [ppm] | mSigma | rdb  | e <sup>-</sup> Conf | N-Rule |
|-----------|---|-------------------------------------------------|--------|-----------|-----------|----------------|--------|------|---------------------|--------|
| 274.01552 | 1 | C <sub>13</sub> H <sub>6</sub> FNO <sub>5</sub> | 100.00 | 274.01572 | 0.75      | 0.75           | 84.1   | 11.5 | even                | ok     |

4a-fluoro-1-methyl-6H-benzo[*c*]chromene-2,6(4aH)-dione (**21**)

<sup>1</sup>H NMR (500 MHz, CDCl<sub>3</sub>)

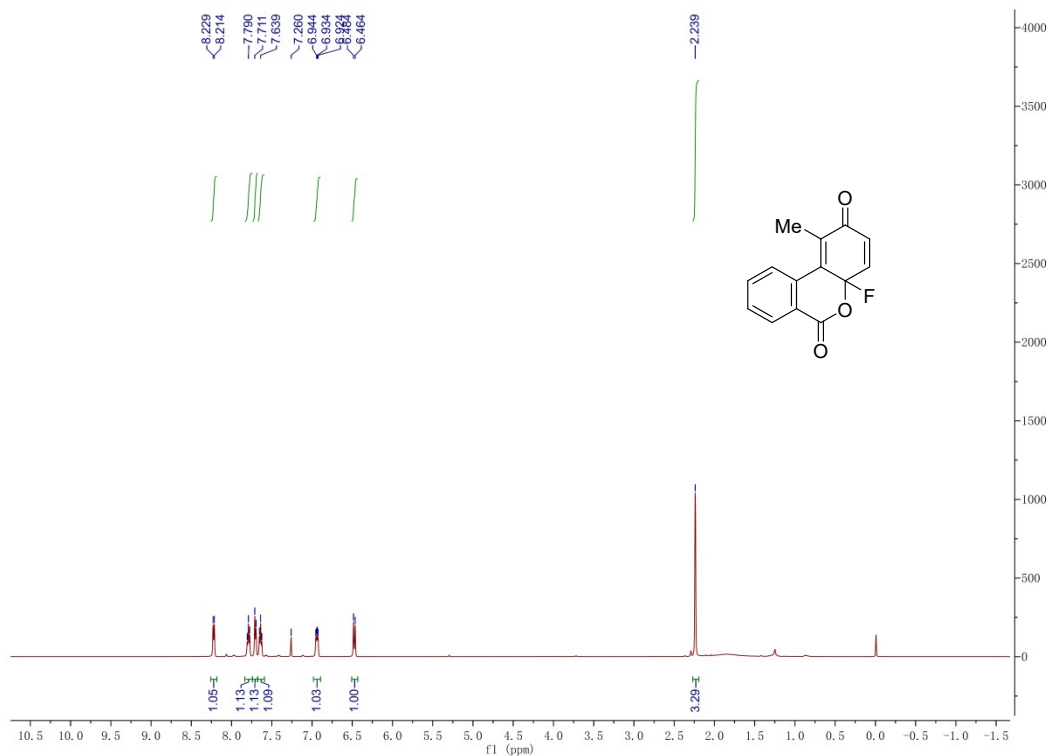

<sup>13</sup>C {<sup>1</sup>H} NMR (126 MHz, CDCl<sub>3</sub>)

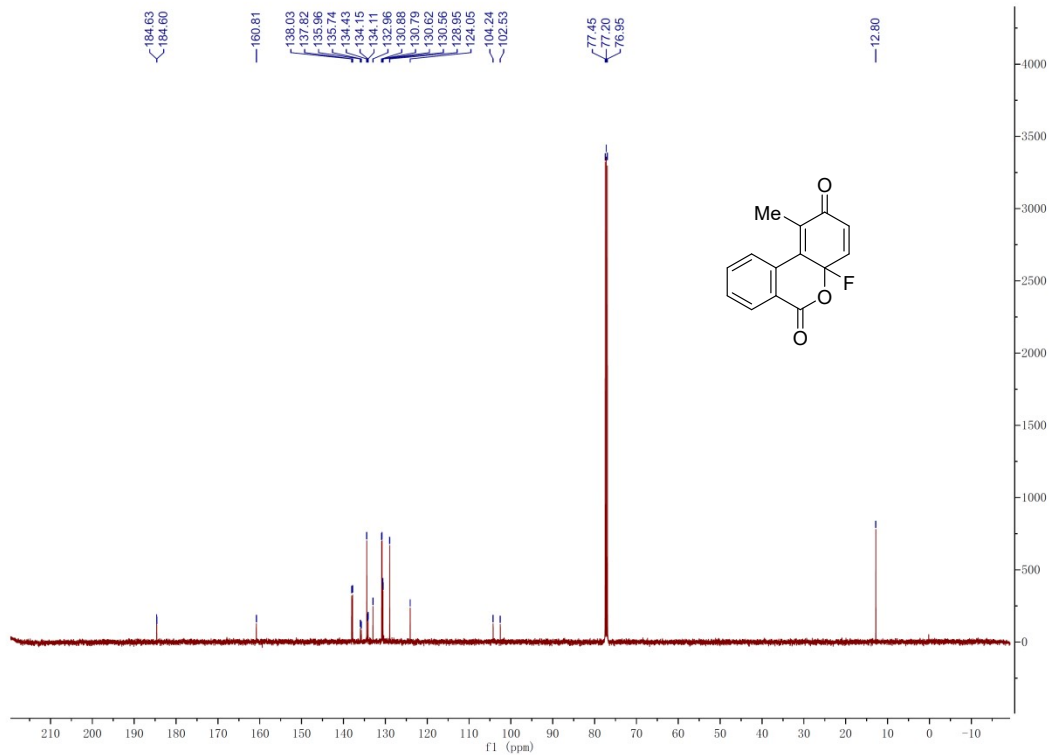

<sup>19</sup>F NMR(376 MHz, CDCl<sub>3</sub>)



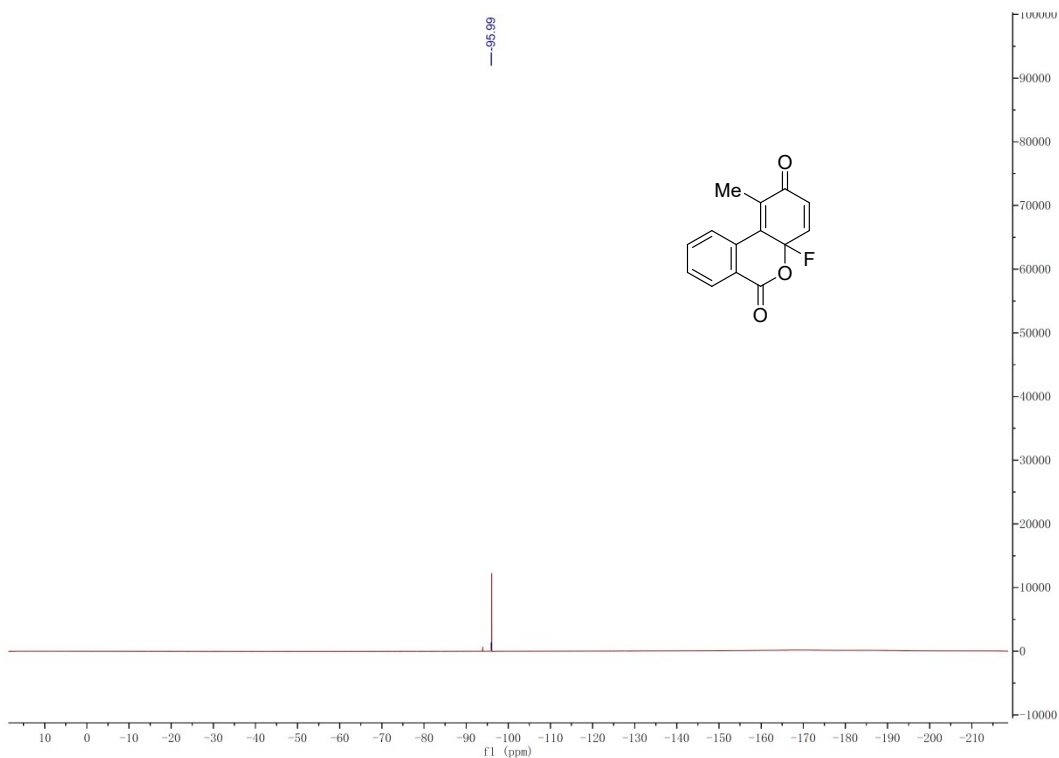

HRMS (ESI-TOF)  $m/z$  calcd for  $C_{14}H_9FO_3$  (M+H)<sup>+</sup> 267.0428, found 267.0430.

**Acquisition Parameter**

|                          |            |                   |     |                       |                          |
|--------------------------|------------|-------------------|-----|-----------------------|--------------------------|
| Polarity                 | Positive   | n/a               | n/a | No. of Laser Shots    | 200                      |
| n/a                      | n/a        | No. of Cell Fills | 1   | Laser Power           | 20.0 Ip                  |
| Broadband Low Mass       | 100.4 m/z  | n/a               | n/a | n/a                   | n/a                      |
| Broadband High Mass      | 1000.0 m/z | n/a               | n/a | n/a                   | n/a                      |
| Acquisition Mode         | Single MS  | n/a               | n/a | Calibration Date      | Wed Jun 17 02:41:42      |
| Pulse Program            | basic      | n/a               | n/a | Data Acquisition Size | 2026576                  |
| Source Accumulation      | 0.500 sec  | n/a               | n/a | Apodization           | Sine-Bell Multiplication |
| Ion Accumulation Time    | 0.200 sec  | n/a               | n/a |                       |                          |
| Flight Time to Acq. Cell | 0.001 sec  |                   |     |                       |                          |

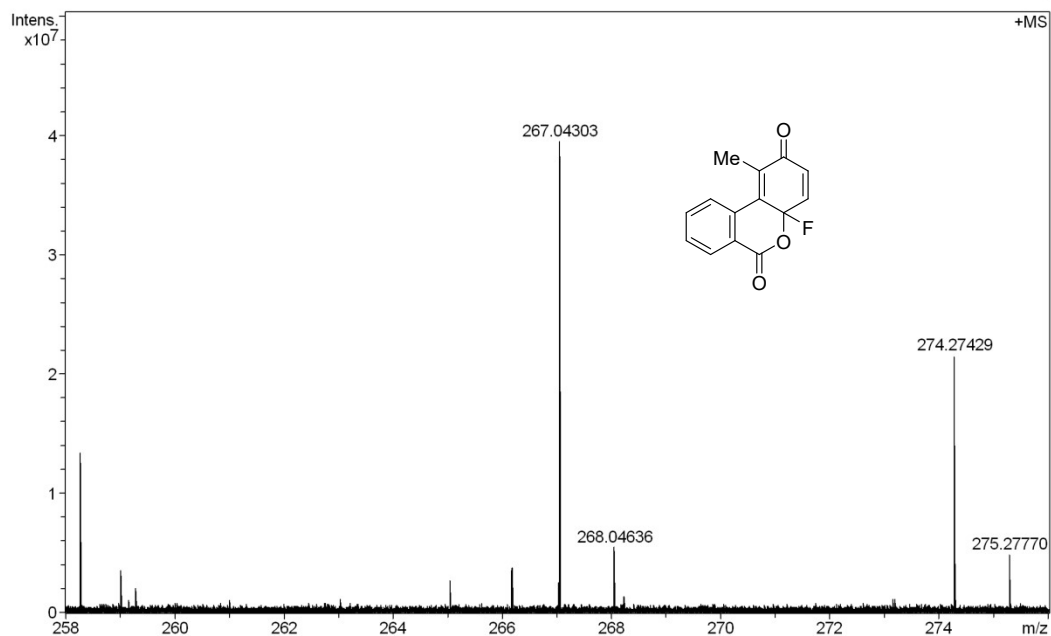

| Meas. $m/z$ | # | Formula                                        | Score  | $m/z$     | err [ppm] | Mean err [ppm] | mSig ma | rdb | e <sup>-</sup> Conf | N-R ulti |
|-------------|---|------------------------------------------------|--------|-----------|-----------|----------------|---------|-----|---------------------|----------|
| 267.04303   | 1 | C <sub>14</sub> H <sub>9</sub> FO <sub>3</sub> | 100.00 | 267.04279 | -0.89     | -0.88          | 11.3    | 9.5 | even                | ok       |

4a-fluoro-4-(trifluoromethyl)-6H-benzo[c]chromene-2,6(4aH)-dione (**2m**)

$^1\text{H}$  NMR (500 MHz,  $\text{CDCl}_3$ )

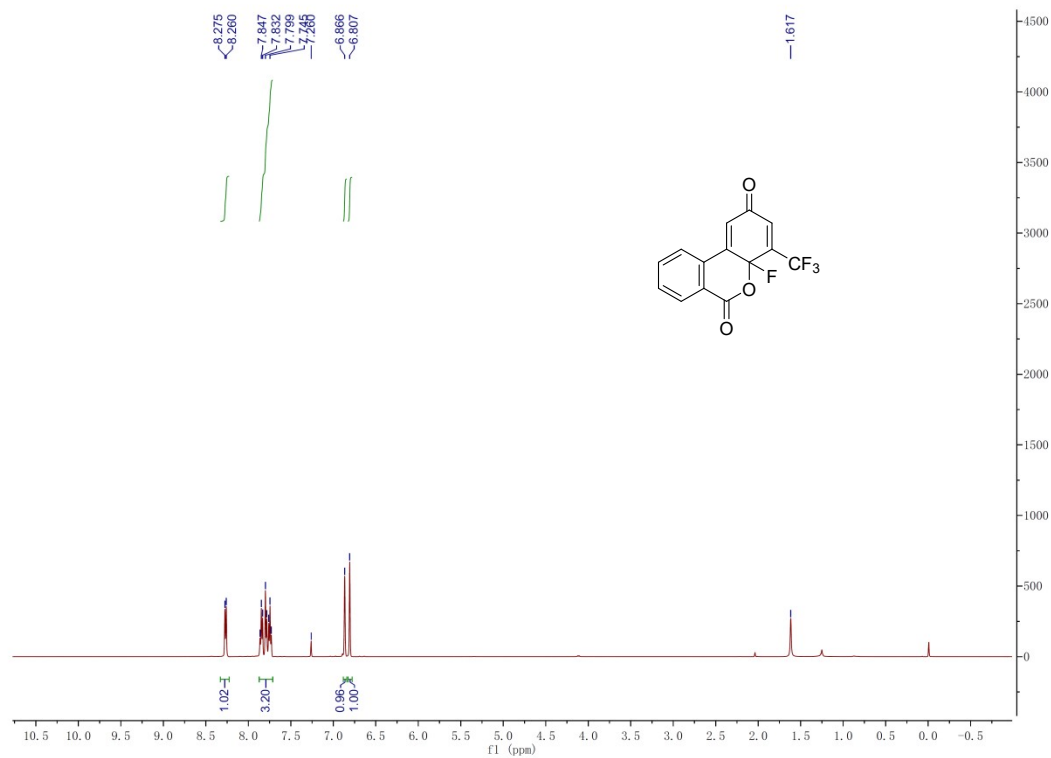

$^{13}\text{C}$  { $^1\text{H}$ } NMR (126 MHz,  $\text{CDCl}_3$ )

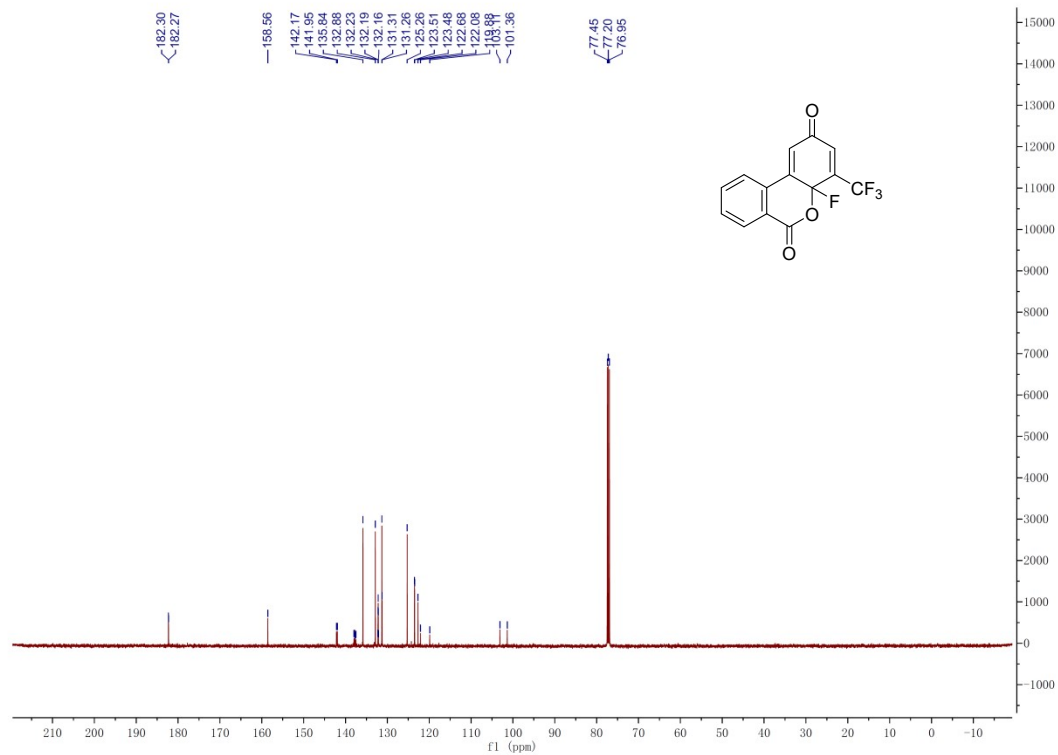

$^{19}\text{F}$  NMR(376 MHz,  $\text{CDCl}_3$ )

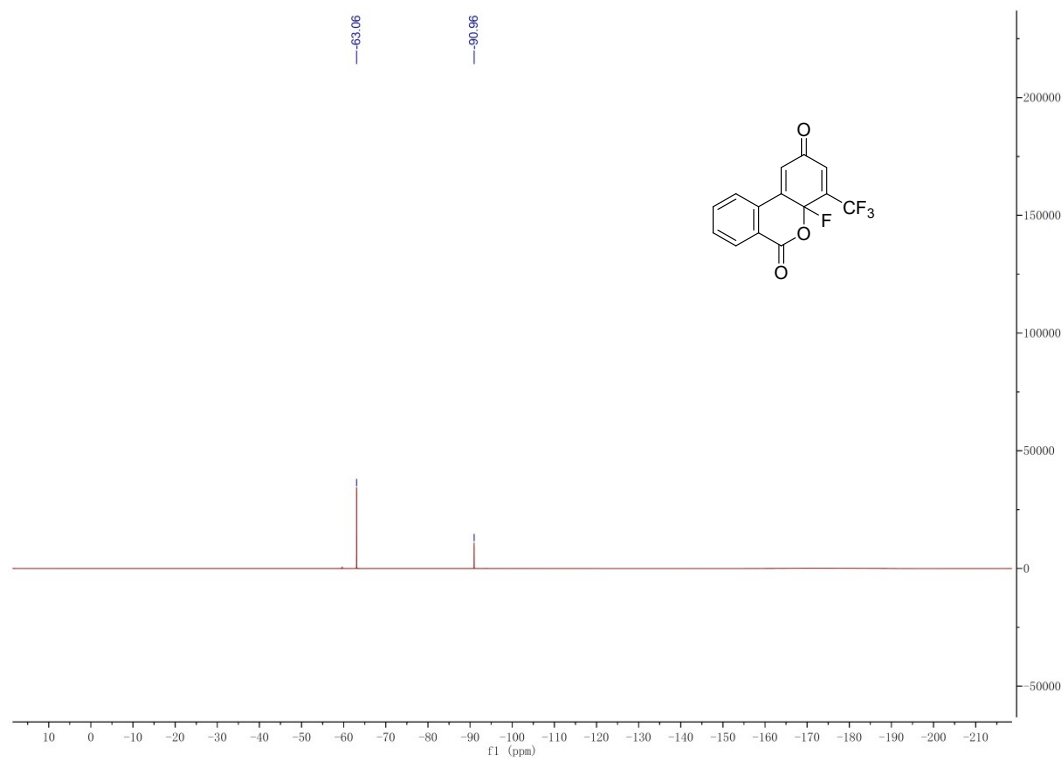

HRMS (ESI-TOF)  $m/z$  calcd for  $\text{C}_{14}\text{H}_6\text{F}_4\text{O}_3$  ( $\text{M}-\text{H}$ ) $^-$  297.0180, found 297.0178.

**Acquisition Parameter**

|                          |              |                   |     |                       |                          |
|--------------------------|--------------|-------------------|-----|-----------------------|--------------------------|
| Polarity                 | Negative     | n/a               | n/a | No. of Laser Shots    | 200                      |
| n/a                      | n/a          | No. of Cell Fills | 1   | Laser Power           | 20.0 lp                  |
| Broadband Low Mass       | 200.7 $m/z$  | n/a               | n/a | n/a                   | n/a                      |
| Broadband High Mass      | 1000.0 $m/z$ | n/a               | n/a | n/a                   | n/a                      |
| Acquisition Mode         | Single MS    | n/a               | n/a | Calibration Date      | Wed Jun 17 02:41:42      |
| Pulse Program            | basic        | n/a               | n/a | Data Acquisition Size | 2028576                  |
| Source Accumulation      | 0.500 sec    | n/a               | n/a | Apodization           | Sine-Bell Multiplication |
| Ion Accumulation Time    | 0.200 sec    | n/a               | n/a |                       |                          |
| Flight Time to Acq. Cell | 0.001 sec    |                   |     |                       |                          |

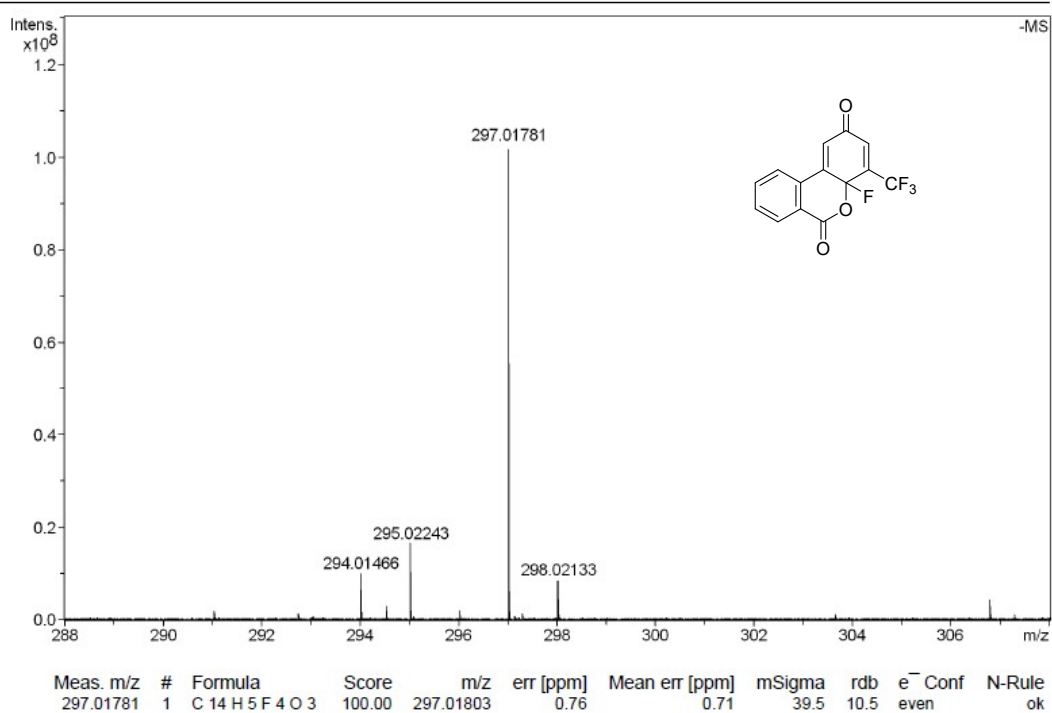

4-chloro-4a-fluoro-6H-benzo[*c*]chromene-2,6(4a*H*)-dione (**2n**)

$^1\text{H}$  NMR (500 MHz,  $\text{CDCl}_3$ )

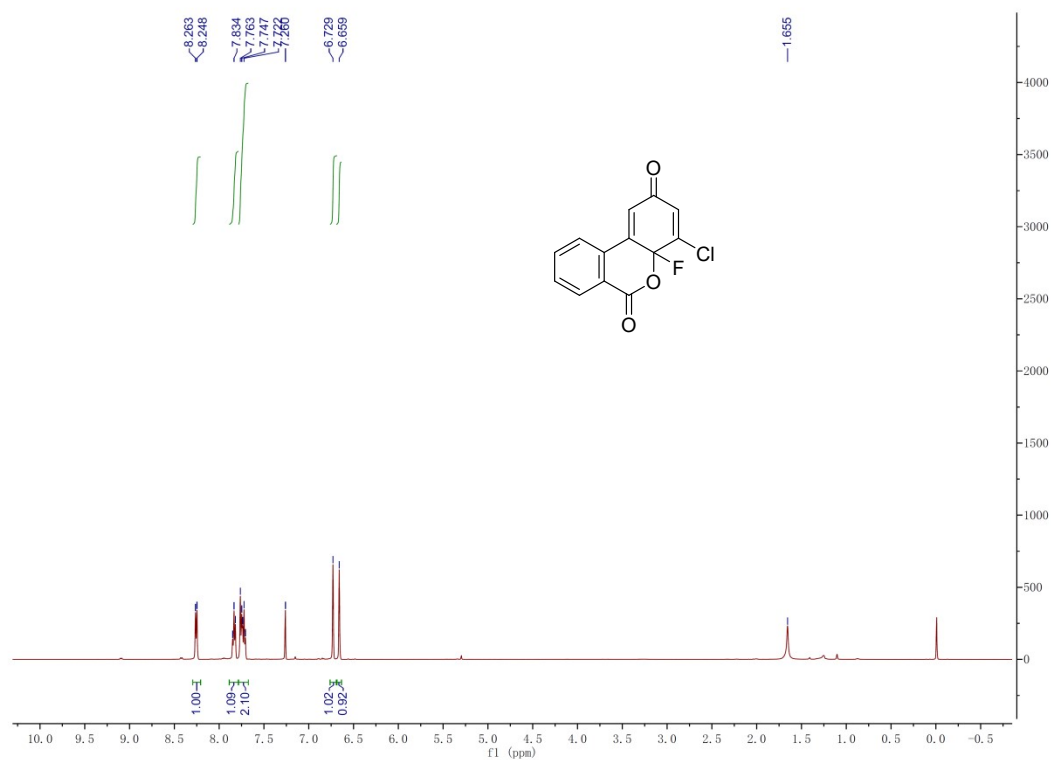

$^{13}\text{C}$  { $^1\text{H}$ } NMR (126 MHz,  $\text{CDCl}_3$ )

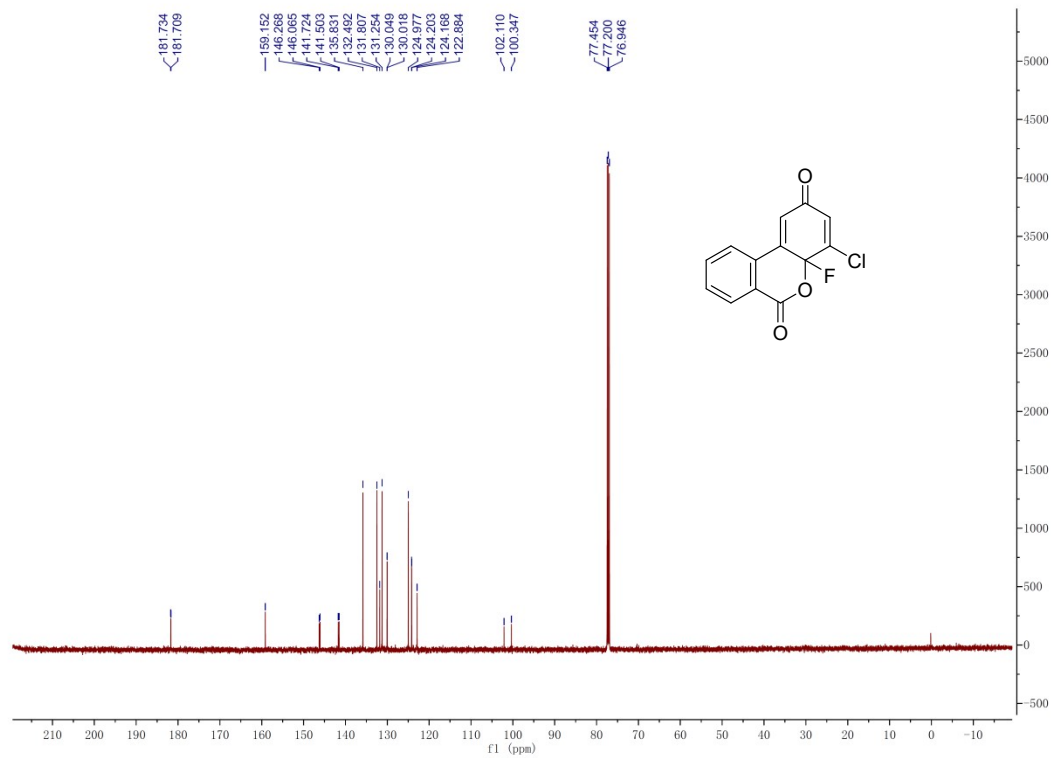

$^{19}\text{F}$  NMR(376 MHz,  $\text{CDCl}_3$ )

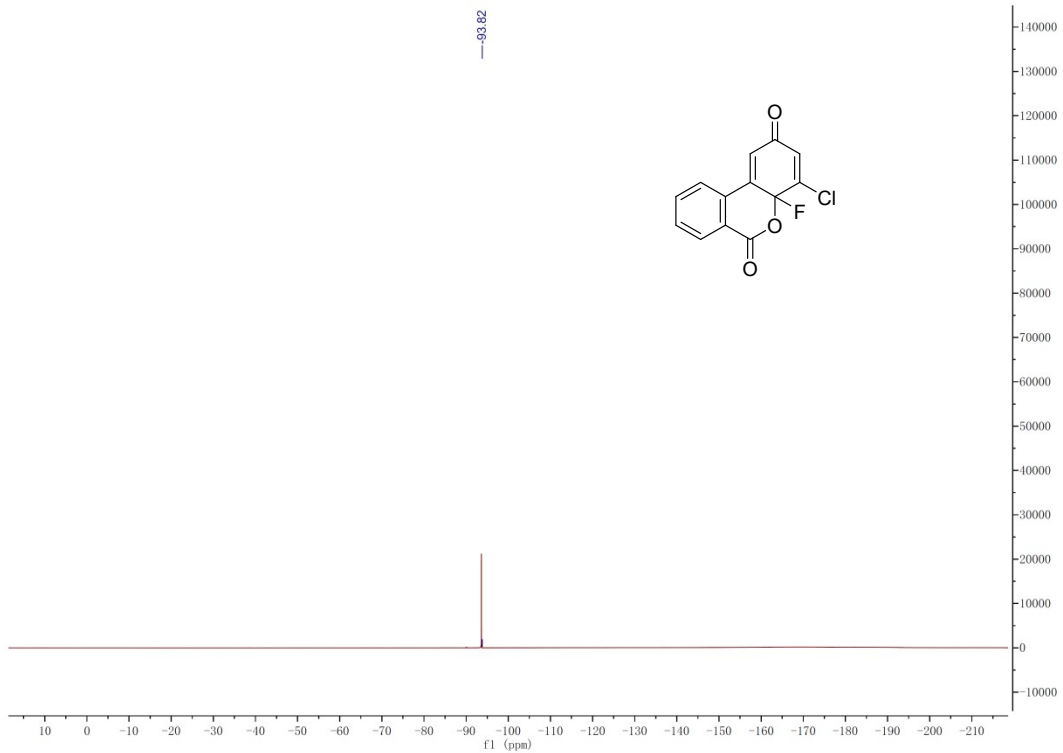

HRMS (ESI-TOF)  $m/z$  calcd for  $C_{13}H_6ClFO_3$  (M-H)<sup>-</sup> 262.9917, found 262.9915.

**Acquisition Parameter**

|                          |            |                   |     |                       |                          |
|--------------------------|------------|-------------------|-----|-----------------------|--------------------------|
| Polarity                 | Negative   | n/a               | n/a | No. of Laser Shots    | 200                      |
| n/a                      | n/a        | No. of Cell Fills | 1   | Laser Power           | 20.0 lp                  |
| Broadband Low Mass       | 200.7 m/z  | n/a               | n/a | n/a                   | n/a                      |
| Broadband High Mass      | 1000.0 m/z | n/a               | n/a | n/a                   | n/a                      |
| Acquisition Mode         | Single MS  | n/a               | n/a | Calibration Date      | Wed Jun 17 02:41:42      |
| Pulse Program            | basic      | n/a               | n/a | Data Acquisition Size | 2029576                  |
| Source Accumulation      | 0.500 sec  | n/a               | n/a | Apodization           | Sine-Bell Multiplication |
| Ion Accumulation Time    | 0.100 sec  | n/a               | n/a |                       |                          |
| Flight Time to Acq. Cell | 0.001 sec  |                   |     |                       |                          |

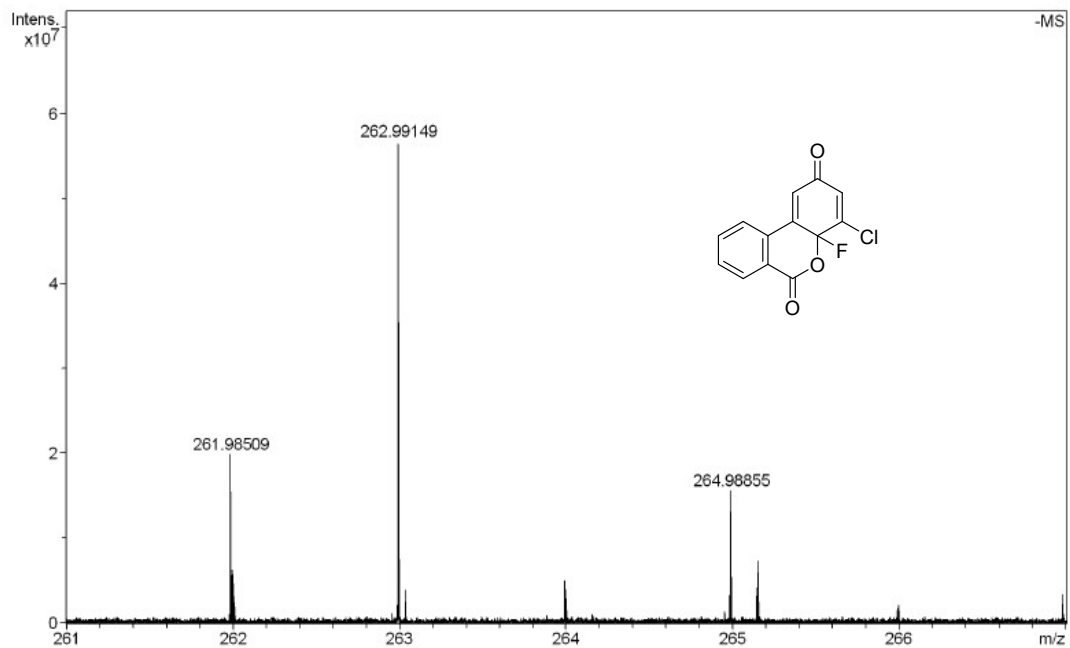

| Meas. $m/z$ | # | Formula                                          | Score  | $m/z$     | err [ppm] | Mean err [ppm] | mSig ma | rdb  | e <sup>-</sup> Conf | N-R ule |
|-------------|---|--------------------------------------------------|--------|-----------|-----------|----------------|---------|------|---------------------|---------|
| 262.99149   | 1 | C <sub>13</sub> H <sub>5</sub> ClFO <sub>3</sub> | 100.00 | 262.99167 | 0.69      | 0.75           | 79.6    | 10.5 | even                | ok      |

4a-fluoro-3-methyl-6H-benzo[*c*]chromene-2,6(4aH)-dione (**2o**)

$^1\text{H}$  NMR (500 MHz,  $\text{CDCl}_3$ )

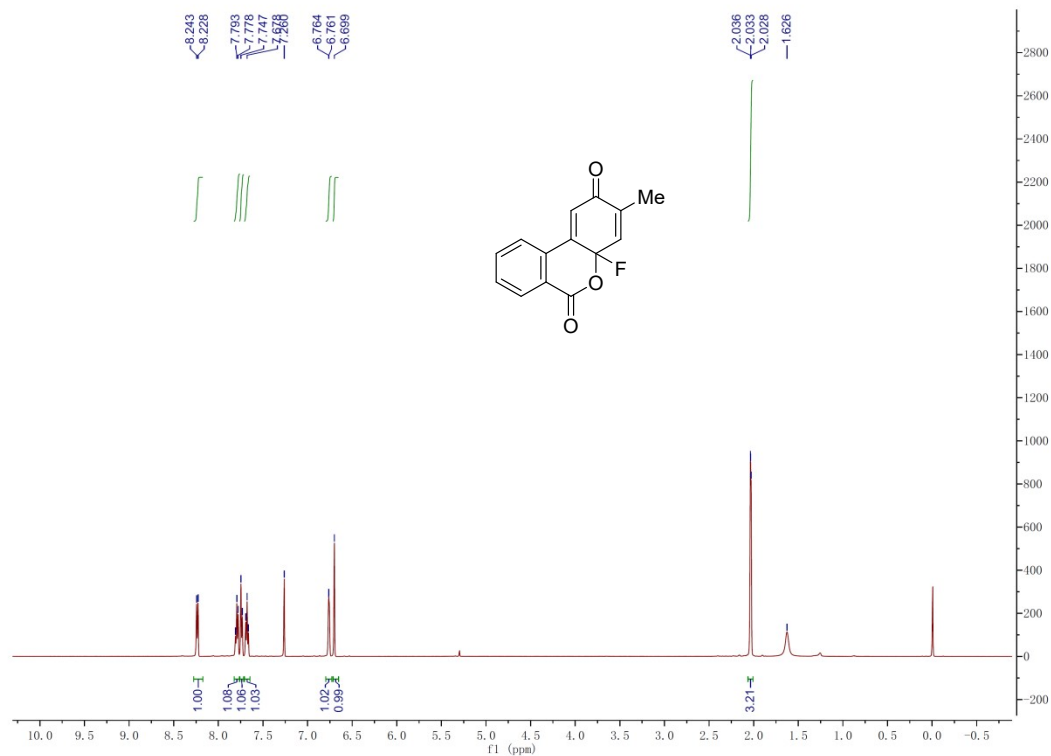

$^{13}\text{C}$  { $^1\text{H}$ } NMR (126 MHz,  $\text{CDCl}_3$ )

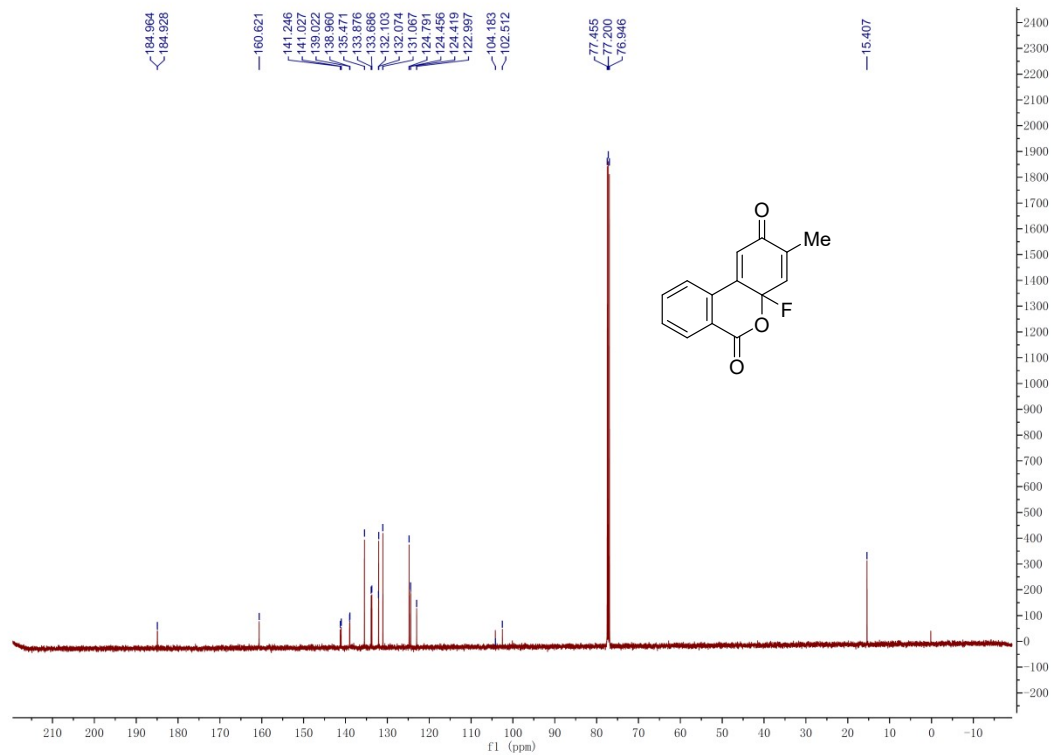

$^{19}\text{F}$  NMR(376 MHz,  $\text{CDCl}_3$ )

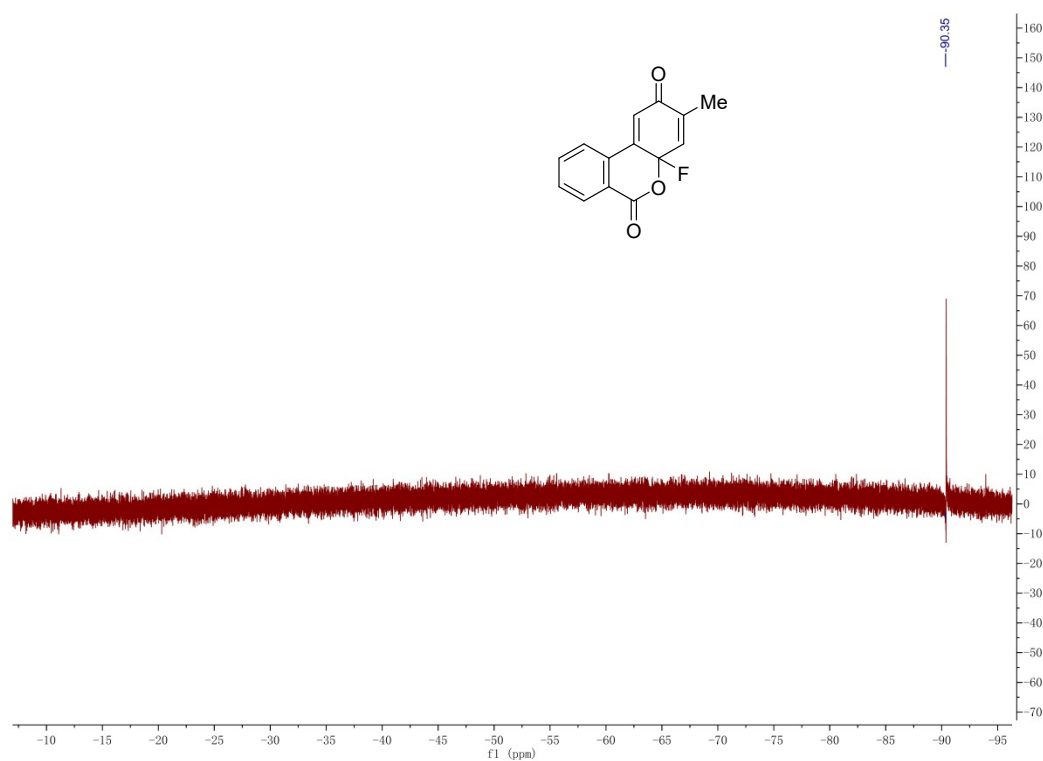

HRMS (ESI-TOF)  $m/z$  calcd for  $\text{C}_{14}\text{H}_9\text{FO}_3$  ( $\text{M}+\text{Na}$ ) $^+$  267.0428, found 267.0432.

**Acquisition Parameter**

|                          |              |                   |     |                       |                          |
|--------------------------|--------------|-------------------|-----|-----------------------|--------------------------|
| Polarity                 | Positive     | n/a               | n/a | No. of Laser Shots    | 200                      |
| n/a                      | n/a          | No. of Cell Fills | 1   | Laser Power           | 20.0 lp                  |
| Broadband Low Mass       | 200.7 $m/z$  | n/a               | n/a | n/a                   | n/a                      |
| Broadband High Mass      | 1000.0 $m/z$ | n/a               | n/a | n/a                   | n/a                      |
| Acquisition Mode         | Single MS    | n/a               | n/a | Calibration Date      | Tue Sep 29 10:34:51 2020 |
| Pulse Program            | basic        | n/a               | n/a | Data Acquisition Size | 1048576                  |
| Source Accumulation      | 0.500 sec    | n/a               | n/a | Apodization           | Sine-Bell Multiplication |
| Ion Accumulation Time    | 0.100 sec    | n/a               | n/a |                       |                          |
| Flight Time to Acq. Cell | 0.001 sec    |                   |     |                       |                          |

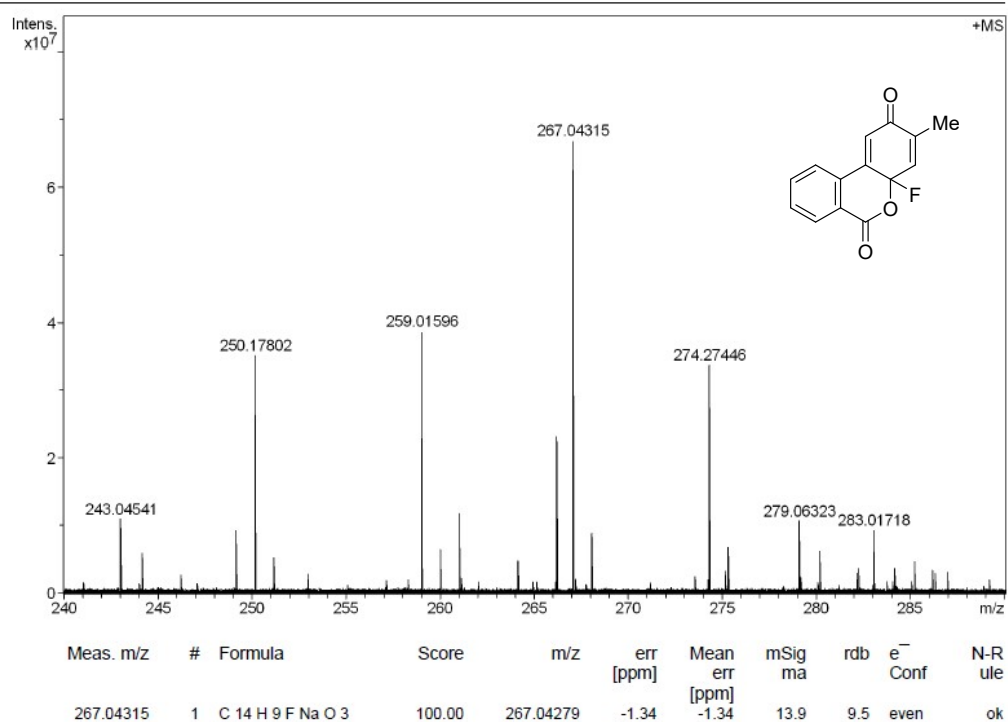

3,4a-difluoro-6H-benzo[c]chromene-2,6(4aH)-dione (**2p**)

<sup>1</sup>H NMR (500 MHz, CDCl<sub>3</sub>)

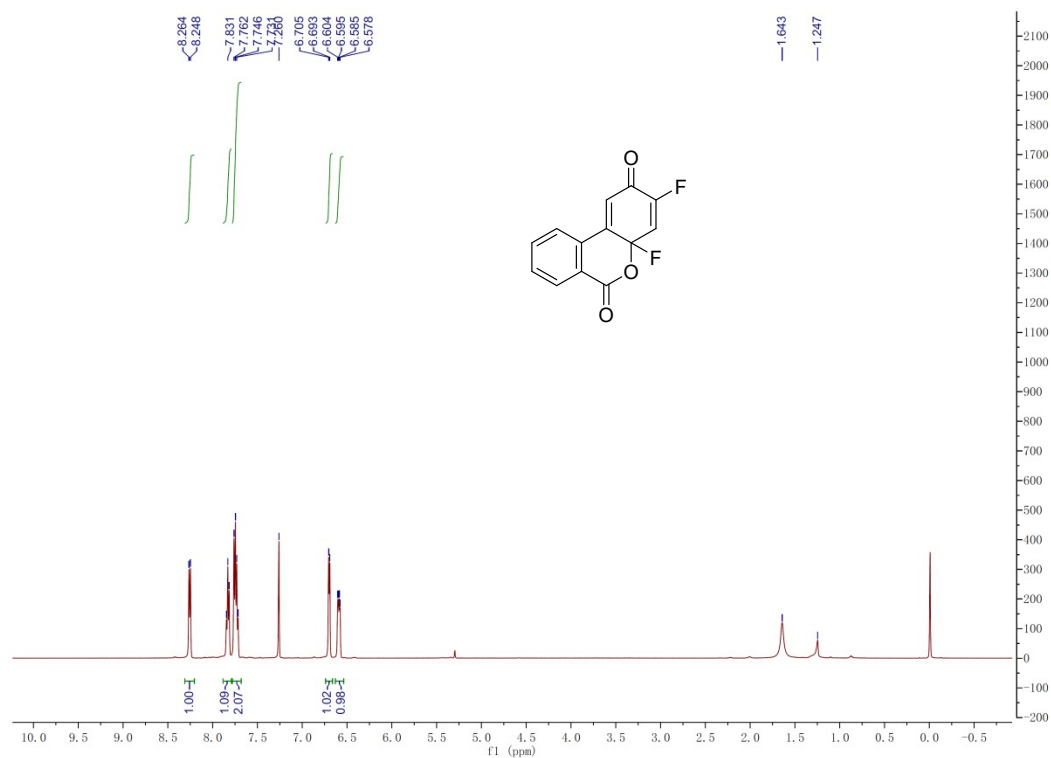

<sup>13</sup>C {<sup>1</sup>H} NMR (126 MHz, CDCl<sub>3</sub>)

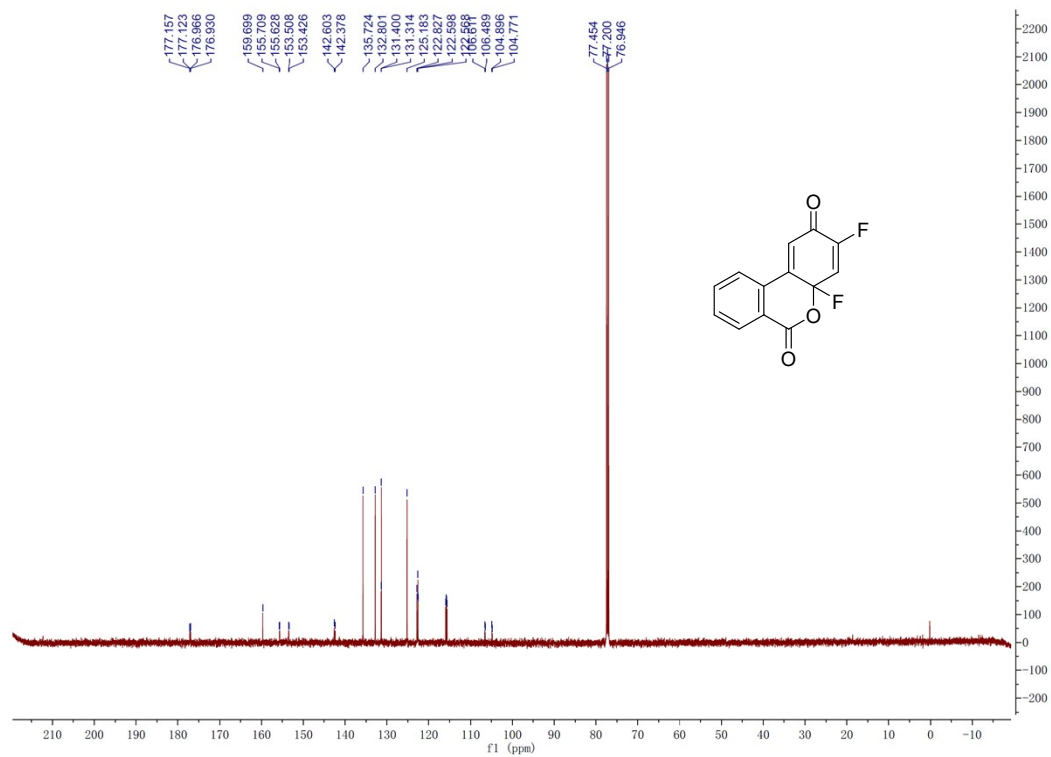

<sup>19</sup>F NMR(376 MHz, CDCl<sub>3</sub>)



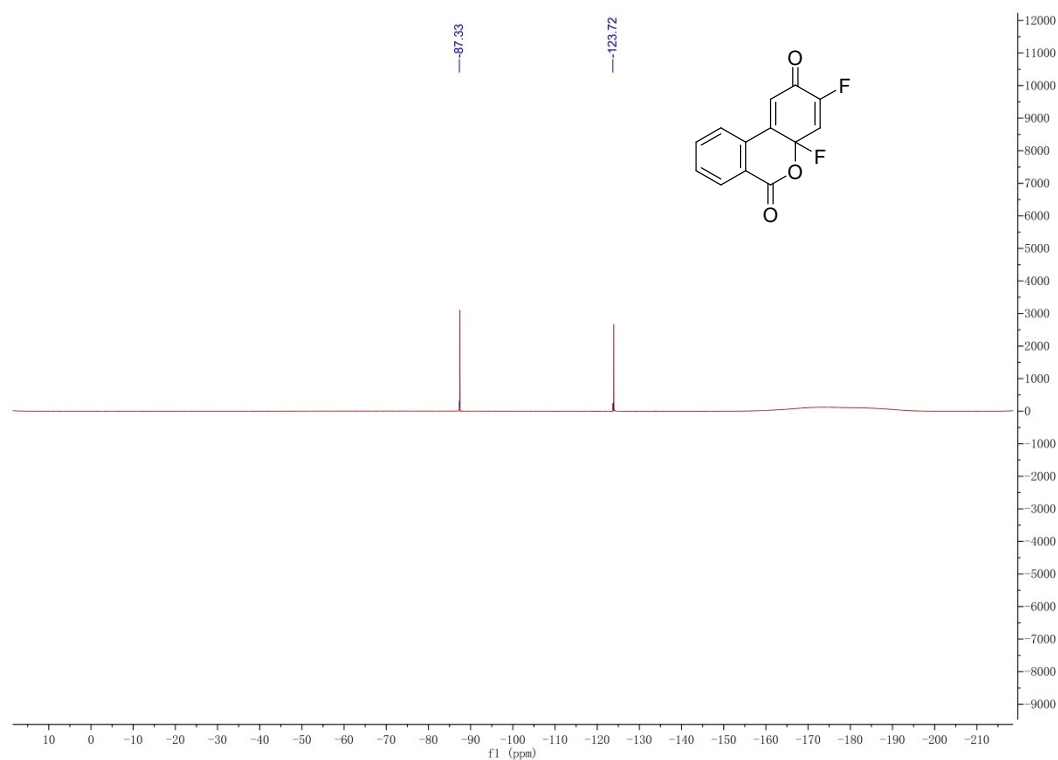

HRMS (ESI-TOF)  $m/z$  calcd for  $C_{13}H_6F_2O_3$  (M-H)<sup>-</sup> 247.0212, found 247.0211.

**Acquisition Parameter**

|                          |            |                   |     |                       |                          |
|--------------------------|------------|-------------------|-----|-----------------------|--------------------------|
| Polarity                 | Negative   | n/a               | n/a | No. of Laser Shots    | 200                      |
| n/a                      | n/a        | No. of Cell Fills | 1   | Laser Power           | 20.0 lp                  |
| Broadband Low Mass       | 200.7 m/z  | n/a               | n/a | n/a                   | n/a                      |
| Broadband High Mass      | 1000.0 m/z | n/a               | n/a | n/a                   | n/a                      |
| Acquisition Mode         | Single MS  | n/a               | n/a | Calibration Date      | Wed Jun 17 02:41:42      |
| Pulse Program            | basic      | n/a               | n/a | Data Acquisition Size | 2028576                  |
| Source Accumulation      | 0.500 sec  | n/a               | n/a | Apodization           | Sine-Bell Multiplication |
| Ion Accumulation Time    | 0.200 sec  | n/a               | n/a |                       |                          |
| Flight Time to Acq. Cell | 0.001 sec  |                   |     |                       |                          |

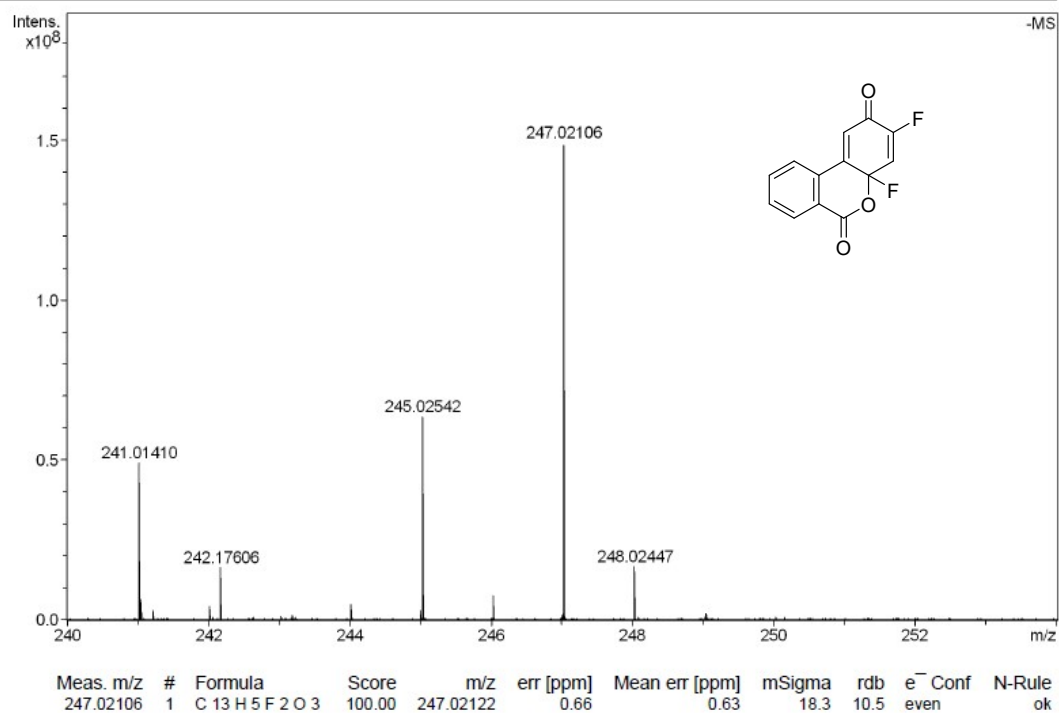

Supplement: d2ob01582j1.pdf [file d2ob01582j1.pdf]
